# Supplementary material for: Iridium-catalyzed C3-selective asymmetric allylation of 7-azaindoles with secondary allylic alcohols
Source: Royal Society of Chemistry journal article supplement (doi:10.1039/d1cc03968g), 2021-01-01
Supplement: d1cc03968g1.pdf [file d1cc03968g1.pdf]

## Supporting Information for

### Iridium-Catalyzed C3-Selective Asymmetric Allylation of 7-Azaindoles with Secondary Allylic Alcohols

Takahiro Sawano,<sup>a</sup> Takeshi Matsui,<sup>a</sup> Marina Koga,<sup>a</sup> Eri Ishikawa,<sup>b</sup> Ryo Takeuchi<sup>a,\*</sup>

<sup>a</sup>*Department of Chemistry and Biological Science, Aoyama Gakuin University, 5-10-1 Fuchinobe, Chuo, Sagamihara, Kanagawa 252-5258, Japan*

<sup>b</sup>*Department of Applied Chemistry, Chubu University, 1200 Matsumoto-cho, Kasugai 487-8501, Japan*

*E-mail: takeuchi@chem.aoyama.ac.jp*

#### Contents of the Supporting Information

|                                                                                                                                                  |         |
|--------------------------------------------------------------------------------------------------------------------------------------------------|---------|
| 1. General Methods and Materials                                                                                                                 | S2      |
| 2. General Procedure for the Asymmetric Allylation of 7-Azaindoles <b>2</b> with Allylic Alcohols <b>1</b> (Schemes 2 and 3)                     | S2-S3   |
| 3. Characterization of <b>3</b>                                                                                                                  | S3-S18  |
| 4. Procedure for the Protonation of 7-Azaindoles <b>2b</b> with Trifluoroacetic Acid                                                             | S18     |
| 5. Procedure for the Asymmetric Allylation of 7-Azaindole <b>2n</b> with Allylic Alcohol <b>1a</b> (Scheme 5)                                    | S18-S19 |
| 6. Procedure for the Deprotection of 7-Azaindoles <b>3ak</b> (Scheme 6)                                                                          | S19     |
| 7. Procedure for the Metathesis Reaction of 7-Azaindole <b>3ab</b> with Methyl Acrylate (Scheme 6)                                               | S19-S20 |
| 8. Procedure for the Hydroboration of 7-Azaindole <b>3ab</b> Followed by Oxidation (Scheme 6)                                                    | S20-S21 |
| 9. Procedure for the Hydrogenation of 7-Azaindole <b>3ab</b> (Scheme 6)                                                                          | S21-S22 |
| 10. The data for X-ray crystal structure of compound [CF <sub>3</sub> COO][HC <sub>8</sub> N <sub>2</sub> H <sub>9</sub> ][CF <sub>3</sub> COOH] | S23-S25 |
| 11. The data for X-ray crystal structure of compound C <sub>17</sub> H <sub>15</sub> BrN <sub>2</sub>                                            | S25-S28 |
| 12. References                                                                                                                                   | S29     |
| 13. <sup>1</sup> H, <sup>13</sup> C, <sup>19</sup> F NMR and HPLC Charts                                                                         | S30-S86 |

## 1. General Methods and Materials

All anaerobic and moisture-sensitive manipulations were carried out with standard Schlenk techniques under predried argon.  $^1\text{H}$ ,  $^{13}\text{C}$ , and  $^{19}\text{F}$  NMR spectra were measured on JEOL ECX 500II spectrometers (500 MHz for  $^1\text{H}$ , 126 MHz for  $^{13}\text{C}$ , 471 MHz for  $^{19}\text{F}$ ). Chemical shifts are reported in  $\delta$  (ppm) referenced to the tetramethylsilane ( $\delta$  0.00) for  $^1\text{H}$  NMR and the residual peaks of  $\text{CDCl}_3$  ( $\delta$  77.00) for  $^{13}\text{C}$  NMR. The following abbreviations are used; s: singlet, d: doublet, t: triplet, sext: sextet, m: multiplet, br: broad. High-resolution mass spectra were obtained with a JEOL JMS-700 Mstation. IR spectra were measured on a JASCO FT/IR-4100 spectrometer. Chiral High Performance Liquid Chromatography (HPLC) was performed on a Shimadzu system under the conditions given for each measurement. The products were purified by column chromatography on 63-210 mesh silica gel (Kanto Kagaku; Silica Gel 60N). Optical rotations were measured on a JASCO P-2200. Single-crystal X-ray diffraction was collected on a Rigaku RAXIS-RAPID imaging plate diffractometer with a graphite monochromatized  $\text{Mo K}\alpha$  ( $\lambda = 0.71069$  Å) radiation. All solvents were dried and distilled before use by the usual procedures.  $[\text{Ir}(\text{cod})\text{Cl}]_2$ , (*R*)-**L1** [CAS RN: 1265884-98-7], and (*R*)-**L2** [CAS RN: 2093047-92-6] were prepared as described in the literature.<sup>1-3</sup> 7-Azaindoles **2a** [CAS RN: 271-63-6], **2l** [CAS RN: 866546-07-8], and **2m** [CAS RN: 183208-35-7] were purchased and used as received. 7-Azaindoles **2b** [CAS RN: 27257-15-4], **2c** [CAS RN: 53277-42-2], **2d** [CAS RN: 183208-23-3], **2e** [CAS RN: 1260874-86-9], **2f** [CAS RN: 183208-22-2], **2g** [CAS RN: 74420-05-6], **2h** [CAS RN: 934568-25-9], **2i** [CAS RN: 1135437-92-1], **2j** [CAS RN: 113975-38-5], **2k** [CAS RN: 418795-13-8], and allylic alcohols **1a** [CAS RN: 4393-06-0], **1b** [CAS RN: 51410-44-7], **1c** [CAS RN: 58824-48-9], **1d** [CAS RN: 39627-62-8], **1e** [CAS RN: 1555908-83-2], **1f** [CAS RN: 58824-56-9], **1g** [CAS RN: 149946-79-2], **1h** [CAS RN: 196519-53-6], **1i** [CAS RN: 123232-63-3], **1j** [CAS RN: 76635-88-6], **1k** [CAS RN: 116914-87-5], **1l** [CAS RN: 393148-57-7] were prepared according to the reported procedures.<sup>4-6</sup>

## 2. General Procedure for the Asymmetric Allylation of 7-Azaindoles **2** with Allylic Alcohols **1** (Schemes 2 and 3)

### Representative Procedure for the Reaction of Allylic Alcohol **1a** with 7-Azaindole **2b**

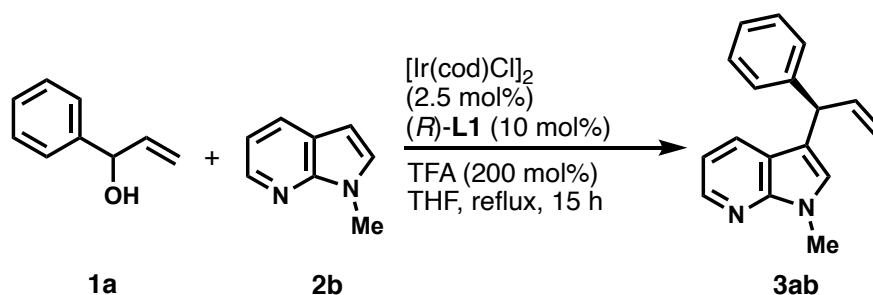

A mixture of  $[\text{Ir}(\text{cod})\text{Cl}]_2$  (8.9 mg, 0.132 mmol) and (*R*)-**L1** (26.3 mg, 0.0518 mmol) in THF (2.0 mL) was stirred at room temperature for 15 min. To the mixture was added **2b** (99.3 mg, 0.751 mmol), **1a** (67.6 mg, 0.504 mmol), and TFA (114 mg, 1.00 mmol), and the mixture was stirred under reflux for 15 h. After the solvent was removed on a rotary evaporator, the residue was subjected to column chromatography (silica gel, toluene/EtOAc = 98/2) to give compounds **3ab** (102.1 mg, 0.4111 mmol, 82% yield, 99% ee).

### 3. Characterization of 3

#### (*R*)-3-(1-Phenylallyl)-1*H*-pyrrolo[2,3-*b*]pyridine (**3aa**)

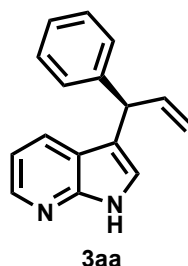

Compound **3aa** was prepared according to general procedure using **1a** (68.7 mg, 0.512 mmol) and **2a** (89.3 mg, 0.756 mmol). The crude reaction mixture was purified by column chromatography using toluene/EtOAc (80/20) to afford **3aa** (28.1 mg, 0.1199 mmol, 23% yield, >99.5% ee) as a brown oil. The ee was measured by HPLC (Chiralcel OJ-H column, 1.0 mL/min, hexane/2-propanol = 95/5, 230 nm,  $t_1$  = 16.8 min (*minor*),  $t_2$  = 23.7 min (*major*));  $[\alpha]_D^{24}$  -20 (*c* 0.50,  $\text{CHCl}_3$ ) for >99.5% ee.  $^1\text{H}$  NMR (500 MHz,  $\text{CDCl}_3$ )  $\delta$  11.17 (s, 1H), 8.28 (dd,  $J$  = 4.6, 1.1 Hz, 1H), 7.67 (dd,  $J$  = 8.1, 1.5 Hz, 1H), 7.35–7.26 (m, 4H), 7.26–7.19 (m, 1H), 7.07 (s, 1H), 6.97 (dd,  $J$  = 8.0, 4.6 Hz, 1H), 6.34 (ddd,  $J$  = 17.2, 10.3, 7.0 Hz, 1H), 5.25–5.18 (m, 1H), 5.12–5.05 (m, 1H), 4.93 (d,  $J$  = 6.9 Hz, 1H);  $^{13}\text{C}\{^1\text{H}\}$  NMR (126 MHz,  $\text{CDCl}_3$ )  $\delta$  149.4, 142.8, 142.3, 140.1, 128.4, 128.35, 128.33, 126.4, 123.3, 119.6, 116.5, 115.7, 115.2, 47.1; IR (neat,  $\text{cm}^{-1}$ ) 3153, 3084, 3026, 2927, 2887, 2786, 1637,

1602, 1581, 1493, 1451, 1419, 1335, 1294, 1218, 1120, 995, 918, 807, 764, 702, 675, 651, 574, 528, 499; HRMS (FAB)  $m/z$   $[M+H]^+$  calcd for  $C_{16}H_{15}N_2$  235.1230; found 235.1233.

**(R)-1-Methyl-3-(1-phenylallyl)-1H-pyrrolo[2,3-b]pyridine (3ab)**

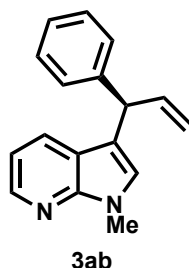

Compound **3ab** was prepared according to general procedure using **1a** (67.6 mg, 0.504 mmol) and **2b** (99.3 mg, 0.751 mmol). The crude reaction mixture was purified by column chromatography using toluene/EtOAc (99/1) to afford **3ab** (102.1 mg, 0.4111 mmol, 82% yield, 99% ee) as a brown oil. The ee was measured by HPLC (Chiralcel OJ-H column, 1.0 mL/min, hexane/2-propanol = 99/1, 230 nm,  $t_1$  = 20.1 min (*minor*),  $t_2$  = 25.4 min (*major*));  $[\alpha]^{25}_D$  -6 ( $c$  1.05,  $CHCl_3$ ) for 99% ee.  $^1H$  NMR (500 MHz,  $CDCl_3$ )  $\delta$  8.29 (dd,  $J$  = 5.2, 1.4 Hz, 1H), 7.62 (dd,  $J$  = 7.5, 1.5 Hz, 1H), 7.32–7.20 (m, 5H), 6.93 (dd,  $J$  = 8.0, 4.9 Hz, 1H), 6.85 (s, 1H), 6.31 (ddd,  $J$  = 17.2, 9.7, 7.2 Hz, 1H), 5.24–5.18 (m, 1H), 5.07 (dt,  $J$  = 16.6, 1.4 Hz, 1H), 4.91 (d,  $J$  = 7.5 Hz, 1H), 3.83 (s, 3H);  $^{13}C\{^1H\}$  NMR (126 MHz,  $CDCl_3$ )  $\delta$  148.3, 142.8, 142.7, 140.1, 128.4, 128.3, 128.0, 127.1, 126.4, 119.5, 115.7, 115.3, 114.9, 47.0, 31.0; IR (neat,  $cm^{-1}$ ) 3382, 3058, 3029, 2975, 2937, 2862, 1706, 1635, 1598, 1575, 1537, 1491, 1459, 1409, 1347, 1298, 1142, 997, 919, 796, 771, 702; HRMS (FAB)  $m/z$   $[M+H]^+$  calcd for  $C_{17}H_{17}N_2$  249.1386; found 249.1382.

**(R)-3-(1-(4-Methoxyphenyl)allyl)-1-methyl-1H-pyrrolo[2,3-b]pyridine (3bb)**

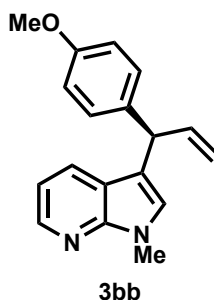

Compound **3bb** was prepared according to general procedure using **1b** (83.2 mg, 0.507 mmol) and **2b** (92.5 mg, 0.700 mmol). The crude reaction mixture was purified by column chromatography using toluene/EtOAc (9/1) to afford **3bb** (120.5 mg, 0.4329 mmol, 85% yield, 96% ee) as a yellow oil. The ee was measured by HPLC (Chiralcel OJ-H

column, 1.0 mL/min, hexane/2-propanol = 99/1, 230 nm,  $t_1$  = 11.3 min (*major*),  $t_2$  = 16.1 min (*minor*);  $[\alpha]^{25}_D -4$  ( $c$  1.01, CHCl<sub>3</sub>) for 96% ee. <sup>1</sup>H NMR (500 MHz, CDCl<sub>3</sub>)  $\delta$  8.29 (d,  $J$  = 4.6 Hz, 1H), 7.62 (d,  $J$  = 8.1 Hz, 1H), 7.17 (d,  $J$  = 8.6 Hz, 2H), 6.93 (dd,  $J$  = 8.0, 5.0 Hz, 1H), 6.85 (d,  $J$  = 8.0 Hz, 2H), 6.84 (s, 1H), 6.29 (ddd,  $J$  = 17.2, 10.3, 7.2 Hz, 1H), 5.18 (d,  $J$  = 10.3 Hz, 1H), 5.05 (d,  $J$  = 17.2 Hz, 1H), 4.86 (d,  $J$  = 6.9 Hz, 1H), 3.83 (s, 3H), 3.79 (s, 3H); <sup>13</sup>C{<sup>1</sup>H} NMR (126 MHz, CDCl<sub>3</sub>)  $\delta$  158.2, 148.3, 142.8, 140.4, 134.9, 129.2, 128.0, 127.0, 119.5, 115.6, 115.4, 114.9, 113.8, 55.2, 46.2, 31.0; IR (neat, cm<sup>-1</sup>) 3057, 3034, 3004, 2951, 2934, 2910, 2835, 1635, 1608, 1599, 1537, 1459, 1409, 1347, 1299, 1247, 1177, 1144, 1036, 919, 826, 807, 772, 643, 545; HRMS (FAB)  $m/z$  [M+H]<sup>+</sup> calcd for C<sub>18</sub>H<sub>19</sub>N<sub>2</sub>O 279.1492; found 279.1489.

**(R)-1-Methyl-3-(1-(*p*-tolyl)allyl)-1*H*-pyrrolo[2,3-*b*]pyridine (3cb)**

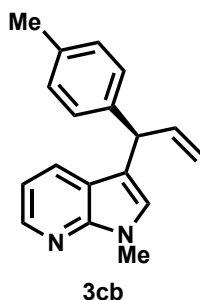

Compound **3cb** was prepared according to general procedure using **1c** (74.0 mg, 0.499 mmol) and **2b** (99.5 mg, 0.753 mmol). The crude reaction mixture was purified by column chromatography using toluene/EtOAc (98/2) to afford **3cb** (111.2 mg, 0.4239 mmol, 85% yield, 98% ee) as a brown oil. The ee was measured by HPLC (Chiralcel OD-H column, 1.0 mL/min, hexane/2-propanol = 99/1, 230 nm,  $t_1$  = 8.5 min (*major*),  $t_2$  = 10.0 min (*minor*);  $[\alpha]^{28}_D +5$  ( $c$  1.09, CHCl<sub>3</sub>) for 98% ee. <sup>1</sup>H NMR (500 MHz, CDCl<sub>3</sub>)  $\delta$  8.29 (dd,  $J$  = 4.6, 1.2 Hz, 1H), 7.63 (dd,  $J$  = 8.1, 1.7 Hz, 1H), 7.19–7.08 (m, 4H), 6.93 (dd,  $J$  = 8.0, 4.9 Hz, 1H), 6.84 (s, 1H), 6.30 (ddd,  $J$  = 17.2, 10.3, 7.2 Hz, 1H), 5.21–5.15 (m, 1H), 5.10–5.03 (m, 1H), 4.87 (d,  $J$  = 6.9 Hz, 1H), 3.82 (s, 3H), 2.32 (s, 3H); <sup>13</sup>C{<sup>1</sup>H} NMR (126 MHz, CDCl<sub>3</sub>)  $\delta$  148.3, 142.8, 140.3, 139.8, 136.0, 129.1, 128.1, 128.0, 127.0, 119.6, 115.51, 115.46, 114.9, 46.7, 31.0, 21.0; IR (neat, cm<sup>-1</sup>) 3051, 3007, 2971, 2922, 2854, 1635, 1597, 1571, 1537, 1511, 1490, 1459, 1409, 1347, 1298, 1143, 996, 918, 811, 771, 732, 640, 546, 523; HRMS (FAB)  $m/z$  [M+H]<sup>+</sup> calcd for C<sub>18</sub>H<sub>19</sub>N<sub>2</sub> 263.1543; found 263.1544.

**(R)-1-Methyl-3-(1-(*o*-tolyl)allyl)-1*H*-pyrrolo[2,3-*b*]pyridine (3db)**

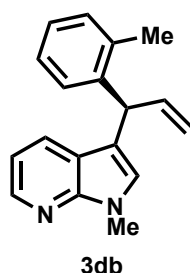

Compound **3db** was prepared according to general procedure using **1d** (76.4 mg, 0.516 mmol) and **2b** (98.7 mg, 0.747 mmol). The crude reaction mixture was purified by column chromatography using hexane/EtOAc (99/1) to afford **3db** (129.8 mg, 0.4947 mmol, 96% yield, >99.5% ee) as a brown oil. The ee was measured by HPLC (Chiralcel OD-H column, 1.0 mL/min, hexane/2-propanol = 99/1, 230 nm,  $t_1$  = 7.0 min (*major*),  $t_2$  = 8.9 min (*minor*));  $[\alpha]^{27}_D +23$  ( $c$  0.54, CHCl<sub>3</sub>) for >99.5% ee. <sup>1</sup>H NMR (500 MHz, CDCl<sub>3</sub>)  $\delta$  8.29 (dd,  $J$  = 5.2, 1.4 Hz, 1H), 7.61 (dd,  $J$  = 8.0, 1.4 Hz, 1H), 7.22–7.09 (m, 4H), 6.94 (dd,  $J$  = 8.0, 4.6 Hz, 1H), 6.75 (s, 1H), 6.27 (ddd,  $J$  = 17.2, 10.3, 6.7 Hz, 1H), 5.21 (dt,  $J$  = 9.8, 1.4 Hz, 1H), 5.09 (d,  $J$  = 5.8 Hz, 1H), 4.97 (dt,  $J$  = 17.2, 1.7 Hz, 1H), 3.82 (s, 3H), 2.33 (s, 3H); <sup>13</sup>C{<sup>1</sup>H} NMR (126 MHz, CDCl<sub>3</sub>)  $\delta$  148.3, 142.8, 140.7, 139.5, 136.0, 130.4, 128.0, 127.8, 127.5, 126.4, 126.0, 119.8, 115.8, 114.9, 114.8, 42.8, 31.0, 19.5; IR (neat, cm<sup>-1</sup>) 3059, 3014, 2979, 2943, 1635, 1598, 1571, 1537, 1488, 1459, 1409, 1347, 1298, 1141, 998, 919, 797, 771, 749, 733, 545; HRMS (FAB)  $m/z$  [M+H]<sup>+</sup> calcd for C<sub>18</sub>H<sub>19</sub>N<sub>2</sub> 263.1543; found 263.1542.

**(R)-3-(1-(2,6-Dimethylphenyl)allyl)-1-methyl-1H-pyrrolo[2,3-b]pyridine (3eb)**

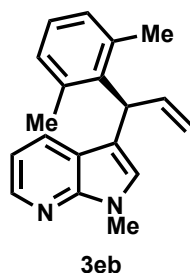

Compound **3eb** was prepared according to general procedure using **1e** (79.9 mg, 0.493 mmol) and **2b** (106.6 mg, 0.8066 mmol). The crude reaction mixture was purified by column chromatography using toluene/EtOAc (98/2) to afford **3eb** (66.6 mg, 0.2410 mmol, 49% yield, >99.5% ee) as a white solid (mp 125.1–126.1 °C). The ee was measured by HPLC (Chiralcel OJ-H column, 1.0 mL/min, hexane/2-propanol = 99/1, 230 nm,  $t_1$  = 5.7 min (*major*),  $t_2$  = 6.5 min (*minor*));  $[\alpha]^{25}_D -76$  ( $c$  1.01, CHCl<sub>3</sub>) for >99.5% ee. <sup>1</sup>H NMR (500 MHz, CDCl<sub>3</sub>)  $\delta$  8.26 (dd,  $J$  = 4.6, 1.7 Hz, 1H), 7.30–7.24 (m, 1H), 7.09 (t,  $J$  = 7.5 Hz, 1H), 7.01 (d,  $J$  = 7.4 Hz, 2H), 6.87–6.82 (m, 2H), 6.48 (ddd,  $J$  = 16.9, 9.9, 6.7 Hz, 1H), 5.35

(d,  $J = 6.9$  Hz, 1H), 5.24 (d,  $J = 10.3$  Hz, 1H), 5.18–5.10 (m, 1H), 3.84 (s, 3H), 2.23 (s, 6H);  $^{13}\text{C}$  NMR (126 MHz,  $\text{CDCl}_3$ )  $\delta$  148.2, 142.7, 138.6, 137.9, 137.0, 129.2, 127.9, 126.5, 126.2, 119.7, 116.1, 114.83, 114.76, 42.6, 31.1, 21.3; IR (KBr,  $\text{cm}^{-1}$ ) 3441, 3055, 3014, 2935, 1536, 1489, 1460, 1407, 1343, 1295, 1215, 1142, 1017, 925, 810, 794, 776; HRMS (FAB)  $m/z$   $[\text{M}+\text{H}]^+$  calcd for  $\text{C}_{19}\text{H}_{21}\text{N}_2$  277.1699; found 277.1703.

**(R)-3-(1-(4-Bromophenyl)allyl)-1-methyl-1H-pyrrolo[2,3-b]pyridine (3fb)**

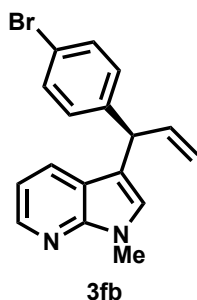

Compound **3fb** was prepared according to general procedure using **1f** (107.3 mg, 0.504 mmol) and **2b** (98.7 mg, 0.747 mmol). The crude reaction mixture was purified by column chromatography using toluene/EtOAc (98/2) to afford **3fb** (103.1 mg, 0.3151 mmol, 63% yield, 99% ee) as a brown oil. The ee was measured by HPLC (Chiralcel OD-H column, 1.0 mL/min, hexane/2-propanol = 99/1, 230 nm,  $t_1 = 9.6$  min (*major*),  $t_2 = 10.9$  min (*minor*));  $[\alpha]_D^{28} -10$  ( $c$  0.50,  $\text{CHCl}_3$ ) for 99% ee.  $^1\text{H}$  NMR (500 MHz,  $\text{CDCl}_3$ )  $\delta$  8.30 (dd,  $J = 5.2, 1.4$  Hz, 1H), 7.58 (dd,  $J = 8.0, 1.7$  Hz, 1H), 7.44–7.39 (m, 2H), 7.15–7.10 (m, 2H), 6.94 (dd,  $J = 8.0, 4.6$  Hz, 1H), 6.85 (s, 1H), 6.26 (ddd,  $J = 17.2, 10.3, 7.0$  Hz, 1H), 5.22 (d,  $J = 10.3$  Hz, 1H), 5.06 (dt,  $J = 16.6, 1.4$  Hz, 1H), 4.86 (d,  $J = 6.9$  Hz, 1H), 3.84 (s, 3H);  $^{13}\text{C}\{^1\text{H}\}$  NMR (126 MHz,  $\text{CDCl}_3$ )  $\delta$  148.3, 143.0, 141.8, 139.5, 131.5, 130.1, 127.8, 127.1, 120.3, 119.3, 116.2, 115.0, 114.7, 46.4, 31.1; IR (neat,  $\text{cm}^{-1}$ ) 3080, 3057, 3007, 2979, 2935, 2858, 1636, 1597, 1572, 1537, 1487, 1459, 1408, 1347, 1298, 1143, 1072, 1011, 921, 802, 771, 546; HRMS (FAB)  $m/z$   $[\text{M}+\text{H}]^+$  calcd for  $\text{C}_{17}\text{H}_{16}\text{BrN}_2$  327.0491; found 327.0495.

**(R)-1-Methyl-3-(1-(4-(trifluoromethyl)phenyl)allyl)-1H-pyrrolo[2,3-b]pyridine (3gb)**

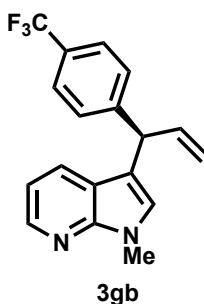

Compound **3gb** was prepared according to general procedure using **1g** (109.2 mg, 0.540 mmol) and **2b** (100.8 mg, 0.7627 mmol). The crude reaction mixture was purified by column chromatography using toluene/EtOAc (98/2) to afford **3gb** (68.2 mg, 0.2156 mmol, 40% yield, 99% ee) as a yellow oil. The ee was measured by HPLC (Chiralcel OJ-H column, 1.0 mL/min, hexane/2-propanol = 99/1, 230 nm,  $t_1$  = 9.4 min (*minor*),  $t_2$  = 10.5 min (*major*));  $[\alpha]^{25}_D -15$  ( $c$  0.97, CHCl<sub>3</sub>) for 99% ee. <sup>1</sup>H NMR (500 MHz, CDCl<sub>3</sub>)  $\delta$  8.31 (dd,  $J$  = 4.6, 1.7 Hz, 1H), 7.59 (dd,  $J$  = 8.1, 1.7 Hz, 1H), 7.56 (d,  $J$  = 8.1 Hz, 1H), 7.38 (d,  $J$  = 8.1 Hz, 2H), 6.95 (dd,  $J$  = 8.0, 4.6 Hz, 1H), 6.88 (s, 1H), 6.29 (ddd,  $J$  = 17.2, 9.8, 7.2 Hz, 1H), 5.28–5.23 (m, 1H), 5.13–5.05 (m, 1H), 4.97 (d,  $J$  = 7.5 Hz, 1H), 3.85 (s, 3H); <sup>13</sup>C{<sup>1</sup>H} NMR (126 MHz, CDCl<sub>3</sub>)  $\delta$  148.3, 146.9, 143.1, 139.2, 128.8 (q,  $J_{C-F}$  = 32.2 Hz), 128.7, 127.8, 127.2, 125.4 (q,  $J_{C-F}$  = 3.6 Hz), 124.2 (q,  $J_{C-F}$  = 270.7 Hz), 119.3, 116.5, 115.1, 114.4, 46.8, 31.1; <sup>19</sup>F NMR (471 MHz, CDCl<sub>3</sub>)  $\delta$  -62.2; IR (neat, cm<sup>-1</sup>) 3059, 3010, 2979, 2937, 2862, 1721, 1636, 1617, 1598, 1537, 1491, 1460, 1411, 1326, 1299, 1164, 1123, 1067, 1017, 924, 832, 805, 772, 602; HRMS (FAB)  $m/z$  [M+H]<sup>+</sup> calcd for C<sub>18</sub>H<sub>16</sub>F<sub>3</sub>N<sub>2</sub> 317.1260; found 317.1261.

**Methyl (R)-4-(1-(1-methyl-1H-pyrrolo[2,3-b]pyridin-3-yl)allyl)benzoate (3hb)**

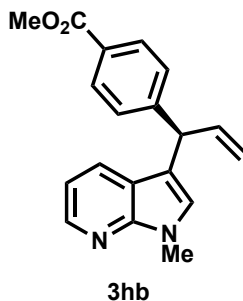

Compound **3hb** was prepared according to general procedure using **1h** (95.9 mg, 0.499 mmol) and **2b** (104.0 mg, 0.7869 mmol). The crude reaction mixture was purified by column chromatography using hexane/EtOAc (3/1) to afford **3hb** (82.6 mg, 0.2696 mmol, 54% yield, 99% ee) as a yellow oil. The ee was measured by HPLC (Chiralcel OJ-3 column, 1.0 mL/min, hexane/2-propanol = 96/4, 230 nm,  $t_1$  = 24.9 min (*minor*),  $t_2$  = 28.2 min (*major*));  $[\alpha]^{25}_D -16$  ( $c$  0.99, CHCl<sub>3</sub>) for 99% ee. <sup>1</sup>H NMR (500 MHz, CDCl<sub>3</sub>)  $\delta$  8.30 (dd,  $J$  = 4.6, 1.7 Hz, 1H), 8.01–7.96 (m, 2H), 7.57 (dd,  $J$  = 8.0, 1.7 Hz, 1H), 7.36–7.32 (m, 2H), 6.94 (dd,  $J$  = 8.1, 4.9 Hz, 1H), 6.87 (s, 1H), 6.30 (ddd,  $J$  = 17.2, 9.7, 7.2 Hz, 1H), 5.27–5.22 (m, 1H), 5.08 (dt,  $J$  = 17.2, 1.3 Hz, 1H), 4.96 (d,  $J$  = 6.9 Hz, 1H), 3.90 (s, 3H), 3.85 (s, 3H); <sup>13</sup>C{<sup>1</sup>H} NMR (126 MHz, CDCl<sub>3</sub>)  $\delta$  167.0, 148.3, 148.1, 143.0, 139.2, 129.8, 128.5, 128.4, 127.8, 127.2, 119.3, 116.4, 115.1, 114.5, 52.0, 47.0, 31.1; IR (neat, cm<sup>-1</sup>) 3423, 3057,

3006, 2951, 2857, 1721, 1608, 1572, 1536, 1491, 1460, 1436, 1410, 1347, 1280, 1179, 1112, 1019, 922, 805, 767, 727, 710, 602, 579, 545; HRMS (FAB)  $m/z$   $[M+H]^+$  calcd for  $C_{19}H_{19}N_2O_2$  307.1441; found 307.1443.

**(R)-1-Methyl-3-(1-(4-nitrophenyl)allyl)-1H-pyrrolo[2,3-b]pyridine (3ib)**

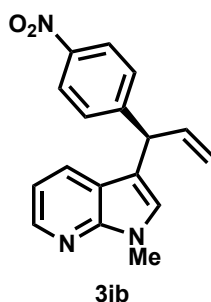

Compound **3ib** was prepared according to general procedure using **1i** (90.1 mg, 0.503 mmol) and **2b** (99.4 mg, 0.752 mmol). The crude reaction mixture was purified by column chromatography using hexane/EtOAc (3/1) to afford **3ib** (38.6 mg, 0.132 mmol, 26% yield, >99.5% ee) as a yellow oil. The ee was measured by HPLC (Chiralpak AD-3 column, 1.0 mL/min, hexane/2-propanol = 95/5, 230 nm,  $t_1$  = 20.4 min (*major*),  $t_2$  = 21.5 min (*minor*));  $[\alpha]_D^{24}$  -24 ( $c$  0.17,  $CHCl_3$ ) for >99.5% ee.  $^1H$  NMR (500 MHz,  $CDCl_3$ )  $\delta$  8.32 (dd,  $J$  = 4.6, 1.7 Hz, 1H), 8.19–8.13 (m, 2H), 7.58–7.53 (m, 1H), 7.42 (d,  $J$  = 8.6 Hz, 2H), 6.96 (dd,  $J$  = 8.1, 4.6 Hz, 1H), 6.92 (s, 1H), 6.30 (ddd,  $J$  = 17.2, 10.3, 6.9 Hz, 1H), 5.29 (d,  $J$  = 9.8 Hz, 1H), 5.10 (d,  $J$  = 17.2 Hz, 1H), 5.03 (d,  $J$  = 6.9 Hz, 1H), 3.87 (s, 3H);  $^{13}C$   $\{^1H\}$  NMR (126 MHz,  $CDCl_3$ )  $\delta$  150.4, 148.3, 146.7, 143.3, 138.6, 129.2, 127.6, 127.2, 119.1, 117.1, 115.3, 113.7, 46.8, 31.1; IR (neat,  $cm^{-1}$ ) 3105, 3077, 3058, 2926, 2855, 1720, 1657, 1637, 1598, 1519, 1491, 1460, 1409, 1345, 1299, 1142, 1123, 1109, 925, 853, 841, 805, 772, 753, 723, 705, 545; HRMS (FAB)  $m/z$   $[M+H]^+$  calcd for  $C_{17}H_{16}N_3O_2$  294.1237; found 294.1237.

**(R)-1-Methyl-3-(1-(naphthalen-2-yl)allyl)-1H-pyrrolo[2,3-b]pyridine (3jb)**

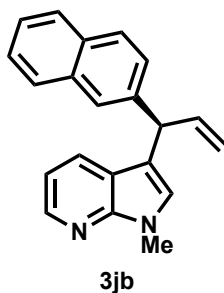

Compound **3jb** was prepared according to general procedure using **1j** (93.7 mg,

0.509 mmol) and **2b** (98.0 mg, 0.741 mmol). The crude reaction mixture was purified by column chromatography using hexane/EtOAc (99/1) to afford **3jb** (143.1 mg, 0.4796 mmol, 94% yield, 99% ee) as a brown oil. The ee was measured by HPLC (Chiralcel OD-H column, 1.0 mL/min, hexane/2-propanol = 99/1, 230 nm,  $t_1$  = 11.2 min (*major*),  $t_2$  = 14.6 min (*minor*));  $[\alpha]^{27}_D +3$  ( $c$  0.59, CHCl<sub>3</sub>) for 99% ee. <sup>1</sup>H NMR (500 MHz, CDCl<sub>3</sub>)  $\delta$  8.29 (dd,  $J$  = 4.6, 1.7 Hz, 1H), 7.84-7.75 (m, 3H), 7.71 (s, 1H), 7.63 (dd,  $J$  = 8.0, 1.4 Hz, 1H), 7.48-7.41 (m, 2H), 7.39 (dd,  $J$  = 8.0, 1.7 Hz, 1H), 6.91 (dd,  $J$  = 7.5, 4.9 Hz, 1H), 6.88 (s, 1H), 6.40 (ddd,  $J$  = 17.2, 9.8, 7.2 Hz, 1H), 5.29-5.23 (m, 1H), 5.16-5.05 (m, 2H), 3.84 (s, 3H); <sup>13</sup>C{<sup>1</sup>H} NMR (126 MHz, CDCl<sub>3</sub>)  $\delta$  148.3, 142.9, 140.3, 139.9, 133.5, 132.3, 128.0, 127.8, 127.6, 127.3, 127.1, 126.5, 126.0, 125.5, 119.6, 116.1, 115.2, 115.0, 47.1, 31.1; IR (neat, cm<sup>-1</sup>) 3055, 3007, 2971, 2938, 1632, 1598, 1571, 1537, 1490, 1459, 1409, 1347, 1298, 1143, 996, 919, 858, 755, 478; HRMS (FAB)  $m/z$  [M+H]<sup>+</sup> calcd for C<sub>21</sub>H<sub>19</sub>N<sub>2</sub> 299.1543; found 299.1546.

**(S)-3-(1-(Furan-2-yl)allyl)-1-methyl-1H-pyrrolo[2,3-b]pyridine (3kb)**

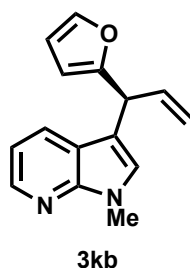

Compound **3kb** was prepared according to general procedure using **1k** (65.0 mg, 0.524 mmol) and **2b** (104.0 mg, 0.7869 mmol). The crude reaction mixture was purified by column chromatography using toluene/EtOAc (98/2) to afford **3kb** (83.0 mg, 0.348 mmol, 66% yield, 83% ee) as a brown oil. The ee was measured by HPLC (Chiralcel OD-H column, 1.0 mL/min, hexane/2-propanol = 99/1, 230 nm,  $t_1$  = 8.9 min (*minor*),  $t_2$  = 9.8 min (*major*));  $[\alpha]^{21}_D +4$  ( $c$  1.00, CHCl<sub>3</sub>) for 83% ee. <sup>1</sup>H NMR (500 MHz, CDCl<sub>3</sub>)  $\delta$  8.31 (dd,  $J$  = 4.6, 1.1 Hz, 1H), 7.74 (dd,  $J$  = 8.0, 1.7 Hz, 1H), 7.37 (s, 1H), 7.03–6.96 (m, 2H), 6.32 (dd,  $J$  = 3.5, 2.0 Hz, 1H), 6.26 (ddd,  $J$  = 17.2, 9.7, 7.0 Hz, 1H), 6.09 (d,  $J$  = 2.9 Hz, 1H), 5.21 (d,  $J$  = 9.7 Hz, 1H), 5.17–5.10 (m, 1H), 4.97 (d,  $J$  = 6.9 Hz, 1H), 3.85 (s, 3H); <sup>13</sup>C{<sup>1</sup>H} NMR (126 MHz, CDCl<sub>3</sub>)  $\delta$  155.8, 148.1, 142.9, 141.6, 137.4, 127.8, 126.9, 119.3, 116.1, 115.1, 112.5, 110.2, 106.2, 40.8, 31.1; IR (neat, cm<sup>-1</sup>) 3116, 3058, 3009, 2975, 2941, 2862, 1723, 1639, 1598, 1538, 1460, 1409, 1348, 1299, 1146, 1010, 921, 799, 770, 599, 546; HRMS (FAB)  $m/z$  [M+H]<sup>+</sup> calcd for C<sub>15</sub>H<sub>15</sub>N<sub>2</sub>O 239.1179; found 239.1180.

**(S)-1-Methyl-3-(1-(thiophen-2-yl)allyl)-1H-pyrrolo[2,3-b]pyridine (3lb)**

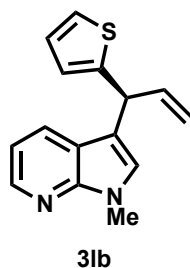

Compound **3lb** was prepared according to general procedure using **1l** (71.3 mg, 0.509 mmol) and **2b** (101.2 mg, 0.7657 mmol). The crude reaction mixture was purified by column chromatography using toluene/EtOAc (98/2) to afford **3lb** (107.5 mg, 0.4226 mmol, 83% yield, 90% ee) as a brown oil. The ee was measured by HPLC (Chiralcel OJ-H column, 1.0 mL/min, hexane/2-propanol = 99/1, 230 nm,  $t_1$  = 26.6 min (*major*),  $t_2$  = 33.1 min (*minor*));  $[\alpha]^{28}_D$  -17 ( $c$  0.53, CHCl<sub>3</sub>) for 90% ee. <sup>1</sup>H NMR (500 MHz, CDCl<sub>3</sub>)  $\delta$  8.31 (dd,  $J$  = 4.6, 1.1 Hz, 1H), 7.72 (dd,  $J$  = 8.0, 1.4 Hz, 1H), 7.18 (dd,  $J$  = 5.2, 1.1 Hz, 1H), 7.01–6.93 (m, 3H), 6.87 (d,  $J$  = 3.5 Hz, 1H), 6.33 (ddd,  $J$  = 16.6, 10.0, 7.2 Hz, 1H), 5.24–5.13 (m, 3H), 3.85 (s, 3H); <sup>13</sup>C{<sup>1</sup>H} NMR (126 MHz, CDCl<sub>3</sub>)  $\delta$  148.2, 146.9, 143.0, 139.6, 127.9, 126.9, 124.7, 126.6, 124.7, 124.0, 119.2, 115.7, 115.1, 115.0, 42.2, 31.1; IR (neat, cm<sup>-1</sup>) 3059, 3007, 2975, 2933, 2858, 1636, 1598, 1571, 1537, 1490, 1459, 1436, 1408, 1347, 1299, 1227, 1141, 1037, 992, 922, 797, 771, 699, 545; HRMS (FAB)  $m/z$  [M+H]<sup>+</sup> calcd for C<sub>15</sub>H<sub>15</sub>N<sub>2</sub>S 255.0951; found 255.0951.

**(R)-5-Methoxy-1-methyl-3-(1-phenylallyl)-1H-pyrrolo[2,3-b]pyridine (3ad)**

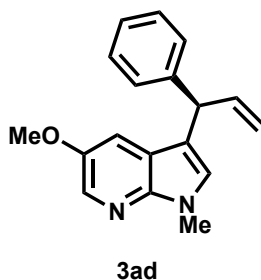

Compound **3ad** was prepared according to general procedure using **1a** (67.3 mg, 0.502 mmol) and **2d** (123.5 mg, 0.7614 mmol). The crude reaction mixture was purified by column chromatography using toluene/EtOAc (98/2) to afford **3ad** (113.4 mg, 0.4074 mmol, 81% yield, 83% ee) as a brown oil. The ee was measured by HPLC (Chiralpak AD-3 column, 1.0 mL/min, hexane/2-propanol = 99/1, 230 nm,  $t_1$  = 15.7 min (*minor*),  $t_2$  = 16.5 min (*major*));  $[\alpha]^{26}_D$  +11 ( $c$  0.53, CHCl<sub>3</sub>) for 83% ee. <sup>1</sup>H NMR (500 MHz, CDCl<sub>3</sub>)  $\delta$  8.07 (d,  $J$  = 2.9 Hz, 1H), 7.34–7.20 (m, 5H), 7.09 (d,  $J$  = 2.5 Hz, 1H), 6.82 (s, 1H), 6.30 (ddd,  $J$  = 17.2, 9.7, 7.2 Hz), 5.21 (d,  $J$  = 10.3 Hz, 1H), 5.08 (d,  $J$  = 17.2 Hz, 1H), 4.86 (d,  $J$  = 7.5

Hz, 1H), 3.80 (s, 3H), 3.76 (s, 3H);  $^{13}\text{C}\{^1\text{H}\}$  NMR (126 MHz,  $\text{CDCl}_3$ )  $\delta$  150.6, 144.0, 142.7, 140.0, 133.2, 128.4, 128.3, 128.0, 126.5, 119.2, 115.7, 114.5, 111.0, 56.4, 47.1, 31.2; IR (neat,  $\text{cm}^{-1}$ ) 3080, 3060, 3026, 3002, 2937, 2834, 1636, 1601, 1535, 1492, 1452, 1407, 1359, 1291, 1261, 1216, 1174, 1140, 1036, 917, 702; HRMS (FAB)  $m/z$   $[\text{M}+\text{H}]^+$  calcd for  $\text{C}_{18}\text{H}_{19}\text{N}_2\text{O}$  279.1492; found 279.1494.

**(R)-5-chloro-1-methyl-3-(1-phenylallyl)-1H-pyrrolo[2,3-b]pyridine (3ae)**

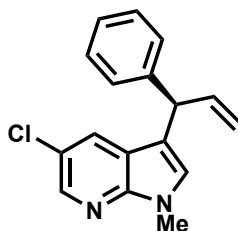

**3ae**

Compound **3ae** was prepared according to general procedure using **1a** (67.1 mg, 0.500 mmol) and **2e** (125.4 mg, 0.7527 mmol). The crude reaction mixture was purified by column chromatography using toluene/EtOAc (98/2) to afford **3ae** (123.7 mg, 0.4375 mmol, 87% yield, 94% ee) as a yellow oil. The ee was measured by HPLC (Chiralcel OZ-H column, 1.0 mL/min, hexane/2-propanol = 99/1, 254 nm,  $t_1$  = 4.9 min (*major*),  $t_2$  = 5.6 min (*minor*));  $[\alpha]_D^{23}$  -3 ( $c$  0.97,  $\text{CHCl}_3$ ) for 94% ee.  $^1\text{H}$  NMR (500 MHz,  $\text{CDCl}_3$ )  $\delta$  8.22 (d,  $J$  = 2.3 Hz, 1H), 7.59 (d,  $J$  = 2.3 Hz, 1H), 7.35–7.29 (m, 2H), 7.27–7.22 (m, 3H), 6.87 (s, 1H), 6.28 (ddd,  $J$  = 17.5, 10.2, 7.2 Hz, 1H), 5.22 (d,  $J$  = 9.8 Hz, 1H), 5.07 (dt,  $J$  = 17.2, 1.4 Hz, 1H), 4.85 (d,  $J$  = 6.9 Hz, 1H), 3.80 (s, 3H);  $^{13}\text{C}\{^1\text{H}\}$  NMR (126 MHz,  $\text{CDCl}_3$ )  $\delta$  146.6, 142.3, 141.4, 139.7, 128.8, 128.5, 128.2, 127.1, 126.7, 123.0, 120.1, 116.1, 115.0, 46.9, 31.2; IR (neat,  $\text{cm}^{-1}$ ) 3081, 3060, 3027, 2976, 2936, 2872, 1636, 1599, 1559, 1532, 1481, 1407, 1348, 1279, 1254, 1222, 1143, 1092, 921, 885, 763, 750, 723, 701, 607, 578; HRMS (FAB)  $m/z$   $[\text{M}+\text{H}]^+$  calcd for  $\text{C}_{17}\text{H}_{16}\text{ClN}_2$  283.0997; found 283.0997.

**(R)-5-Bromo-1-methyl-3-(1-phenylallyl)-1H-pyrrolo[2,3-b]pyridine (3af)**

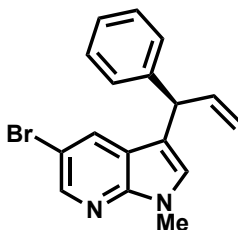

**3af**

Compound **3af** was prepared according to general procedure using **1a** (68.1 mg, 0.508 mmol) and **2f** (158.4 mg, 0.7505 mmol). The crude reaction mixture was purified

by column chromatography using toluene/EtOAc (99/1) to afford **3af** (125.6 mg, 0.3838 mmol, 76% yield, 97% ee) as a brown oil. The ee was measured by HPLC (Chiralcel OZ-H column, 1.0 mL/min, hexane/2-propanol = 99/1, 230 nm,  $t_1$  = 5.3 min (*major*),  $t_2$  = 6.0 min (*minor*));  $[\alpha]^{25}_D +18$  ( $c$  0.50, CHCl<sub>3</sub>) for 97% ee. <sup>1</sup>H NMR (500 MHz, CDCl<sub>3</sub>)  $\delta$  8.30 (d,  $J$  = 1.7 Hz, 1H), 7.74 (d,  $J$  = 2.0 Hz, 1H), 7.32 (t,  $J$  = 7.5 Hz, 2H), 7.27–7.22 (m, 3H), 6.84 (s, 1H), 6.28 (ddd,  $J$  = 17.2, 10.3, 7.0 Hz, 1H), 5.22 (d,  $J$  = 9.8 Hz, 1H), 5.06 (d,  $J$  = 17.2 Hz, 1H), 4.85 (d,  $J$  = 6.9 Hz, 1H), 3.80 (s, 3H); <sup>13</sup>C{<sup>1</sup>H} NMR (126 MHz, CDCl<sub>3</sub>)  $\delta$  146.6, 143.3, 142.3, 139.7, 130.0, 128.6, 128.5, 128.2, 126.7, 121.0, 116.1, 115.0, 111.0, 46.8, 31.2; IR (neat, cm<sup>-1</sup>) 3076, 3060, 3027, 3004, 2979, 2938, 2872, 1636, 1598, 1557, 1531, 1481, 1451, 1408, 1349, 1278, 1255, 1222, 1142, 1079, 995, 920, 882, 815, 762, 701; HRMS (FAB)  $m/z$  [M+H]<sup>+</sup> calcd for C<sub>17</sub>H<sub>16</sub>BrN<sub>2</sub> 327.0491; found 327.0488.

**(R)-4-Chloro-1-methyl-3-(1-phenylallyl)-1H-pyrrolo[2,3-b]pyridine (3ag)**

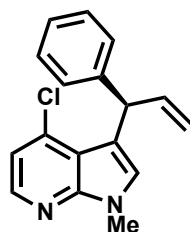

**3ag**

Compound **3ag** was prepared according to general procedure using **1a** (68.5 mg, 0.511 mmol) and **2g** (121.2 mg, 0.7275 mmol). The crude reaction mixture was purified by column chromatography using hexane/EtOAc (9/1) to afford **3ag** (71.4 mg, 0.253 mmol, 49% yield, 97% ee) as a white solid (mp 69.0–69.3 °C). The ee was measured by HPLC (Chiralpak AD-3 column, 1.0 mL/min, hexane/2-propanol = 99/1, 230 nm,  $t_1$  = 7.7 min (*minor*),  $t_2$  = 9.1 min (*major*));  $[\alpha]^{25}_D -6$  ( $c$  0.99, CHCl<sub>3</sub>) for 97% ee. <sup>1</sup>H NMR (500 MHz, CDCl<sub>3</sub>)  $\delta$  8.15 (d,  $J$  = 5.2 Hz, 1H), 7.33–7.27 (m, 2H), 7.26–7.19 (m, 3H), 6.98 (d,  $J$  = 5.2 Hz, 1H), 6.87 (s, 1H), 6.33 (ddd,  $J$  = 17.2, 10.3, 6.4 Hz, 1H), 5.46 (d,  $J$  = 6.3 Hz, 1H), 5.21 (d,  $J$  = 10.3 Hz, 1H), 4.88 (d,  $J$  = 17.2 Hz, 1H), 3.83 (s, 3H); <sup>13</sup>C{<sup>1</sup>H} NMR (126 MHz, CDCl<sub>3</sub>)  $\delta$  149.1, 143.0, 140.9, 136.2, 128.7, 128.2, 126.3, 117.1, 116.4, 115.9, 115.6, 46.0, 31.5; IR (KBr, cm<sup>-1</sup>) 3444, 3085, 3029, 3005, 2941, 2896, 1637, 1590, 1551, 1523, 1487, 1453, 1408, 1348, 1312, 1295, 1150, 1005, 991, 914, 878, 819, 765, 704, 662, 631, 604, 594, 551; HRMS (FAB)  $m/z$  [M+H]<sup>+</sup> calcd for C<sub>17</sub>H<sub>16</sub>ClN<sub>2</sub> 283.0997; found 283.1001.

**(R)-6-Chloro-1-methyl-3-(1-phenylallyl)-1H-pyrrolo[2,3-b]pyridine (3ah)**

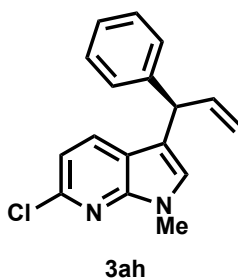

Compound **3ah** was prepared according to general procedure using **1a** (67.0 mg, 0.499 mmol) and **2h** (126.1 mg, 0.7569 mmol). The crude reaction mixture was purified by column chromatography using toluene/EtOAc (98/2) to afford **3ah** (116.3 mg, 0.4113 mmol, 82% yield, 80% ee) as a brown oil. The ee was measured by HPLC (Chiralcel OD-H column, 1.0 mL/min, hexane/2-propanol = 99/1, 230 nm,  $t_1$  = 12.3 min (*major*),  $t_2$  = 13.0 min (*minor*));  $[\alpha]^{26}_D -3$  ( $c$  1.06, CHCl<sub>3</sub>) for 80% ee. <sup>1</sup>H NMR (500 MHz, CDCl<sub>3</sub>)  $\delta$  7.51 (d,  $J$  = 8.0 Hz, 1H), 7.34–7.28 (m, 2H), 7.27–7.21 (m, 3H), 6.93 (d,  $J$  = 8.1 Hz, 1H), 6.82 (s, 1H), 6.28 (ddd,  $J$  = 17.2, 9.8, 7.2 Hz, 1H), 5.21 (dt,  $J$  = 10.3, 1.3 Hz, 1H), 5.06 (dt,  $J$  = 16.6, 1.4 Hz, 1H), 4.86 (d,  $J$  = 6.9 Hz, 1H), 3.80 (s, 3H); <sup>13</sup>C{<sup>1</sup>H} NMR (126 MHz, CDCl<sub>3</sub>)  $\delta$  147.3, 144.5, 142.4, 139.8, 130.3, 128.5, 128.2, 127.3, 126.6, 118.0, 115.94, 115.87, 115.0, 47.0, 31.2; IR (neat, cm<sup>-1</sup>) 3081, 3059, 3026, 2978, 2939, 2872, 1636, 1599, 1563, 1533, 1490, 1438, 1410, 1347, 1306, 1119, 998, 918, 876, 812, 759, 732, 701, 640, 589; HRMS (FAB)  $m/z$  [M+H]<sup>+</sup> calcd for C<sub>17</sub>H<sub>16</sub>ClN<sub>2</sub> 283.0997; found 283.0997.

**(R)-1-Methyl-5-nitro-3-(1-phenylallyl)-1H-pyrrolo[2,3-b]pyridine (3ai)**

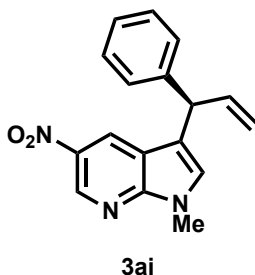

Compound **3ai** was prepared according to general procedure using **1a** (70.7 mg, 0.527 mmol) and **2i** (132.8 mg, 0.7496 mmol). The crude reaction mixture was purified by column chromatography using hexane/EtOAc (95/5) to afford **3ai** (19.7 mg, 0.0672 mmol, 13% yield, 80% ee) as a yellow oil. The ee was measured by HPLC (Chiralpak AS-3 column, 1.0 mL/min, hexane/2-propanol = 95/5, 230 nm,  $t_1$  = 8.9 min (*major*),  $t_2$  = 10.0 min (*minor*));  $[\alpha]^{25}_D +31$  ( $c$  0.60, CHCl<sub>3</sub>) for 80% ee. <sup>1</sup>H NMR (500 MHz, CDCl<sub>3</sub>)  $\delta$  9.18 (d,  $J$  = 2.3 Hz, 1H), 8.47 (d,  $J$  = 2.3 Hz, 1H), 7.34 (t,  $J$  = 7.5 Hz, 2H), 7.27 (t,  $J$  = 7.2 Hz, 3H), 7.00 (s, 1H), 6.31 (ddd,  $J$  = 16.6, 10.0, 7.0 Hz, 1H), 5.27 (d,  $J$  = 10.9 Hz, 1H), 5.10 (d,  $J$  = 16.6 Hz, 1H), 4.94 (d,  $J$  = 6.9 Hz, 1H), 3.89 (s, 3H); <sup>13</sup>C{<sup>1</sup>H} NMR (126 MHz, CDCl<sub>3</sub>)

$\delta$  149.9, 141.7, 139.6, 139.2, 138.5, 130.6, 128.7, 128.2, 127.0, 124.3, 118.5, 118.4, 116.6, 46.7, 31.6; IR (neat,  $\text{cm}^{-1}$ ) 3079, 3023, 2978, 2938, 2855, 1855, 1712, 1637, 1560, 1575, 1538, 1511, 1492, 1447, 1414, 1332, 1298, 1214, 1151, 1105, 992, 920, 822, 778, 749, 703, 609; HRMS (FAB)  $m/z$   $[M+H]^+$  calcd for  $\text{C}_{17}\text{H}_{16}\text{N}_3\text{O}_2$  294.1237; found 294.1237.

**(R)-1,2-Dimethyl-3-(1-phenylallyl)-1H-pyrrolo[2,3-b]pyridine (3aj)**

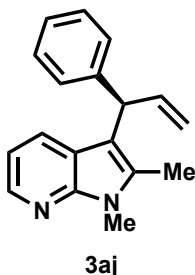

Compound **3aj** was prepared according to general procedure using **1a** (61.0 mg, 0.455 mmol) and **2j** (107.2 mg, 0.7333 mmol). The crude reaction mixture was purified by column chromatography using toluene/EtOAc (8/2) to afford **3aj** (90.7 mg, 0.346 mmol, 76% yield, 96% ee) as a yellow oil. The ee was measured by HPLC (Chiralcel OD-H column, 1.0 mL/min, hexane/2-propanol = 99/1, 230 nm,  $t_1$  = 9.0 min (*major*),  $t_2$  = 11.0 min (*minor*));  $[\alpha]^{25}_{\text{D}} -3$  ( $c$  0.91,  $\text{CHCl}_3$ ) for 96% ee.  $^1\text{H}$  NMR (500 MHz,  $\text{CDCl}_3$ )  $\delta$  8.19 (dd,  $J$  = 4.6, 1.7 Hz, 1H), 7.54 (dd,  $J$  = 7.5, 1.4 Hz, 1H), 7.27 (d,  $J$  = 4.6 Hz, 4H), 7.19 (sextet,  $J$  = 4.2 Hz, 1H), 6.87 (dd,  $J$  = 7.5, 4.6 Hz, 1H), 6.42 (ddd,  $J$  = 17.2, 10.3, 6.9 Hz, 1H), 5.21 (dt,  $J$  = 10.3, 1.6 Hz, 1H), 5.04 (dt,  $J$  = 17.2, 1.7 Hz, 1H), 4.98 (d,  $J$  = 6.9 Hz, 1H), 3.79 (s, 3H), 2.38 (s, 3H);  $^{13}\text{C}\{^1\text{H}\}$  NMR (126 MHz,  $\text{CDCl}_3$ )  $\delta$  148.0, 142.9, 141.3, 139.8, 134.1, 128.2, 128.1, 127.0, 126.1, 119.6, 115.7, 115.0, 110.3, 45.8, 28.0, 10.7; IR (neat,  $\text{cm}^{-1}$ ) 3079, 3058, 3026, 2974, 2935, 2859, 1718, 1659, 1635, 1597, 1573, 1548, 1490, 1459, 1416, 1337, 1307, 1173, 1127, 995, 917, 794, 771, 722, 701, 569; HRMS (FAB)  $m/z$   $[M+H]^+$  calcd for  $\text{C}_{18}\text{H}_{19}\text{N}_2$  263.1543; found 263.1543.

**(R)-1-(4-Methoxybenzyl)-3-(1-phenylallyl)-1H-pyrrolo[2,3-b]pyridine (3ak)**

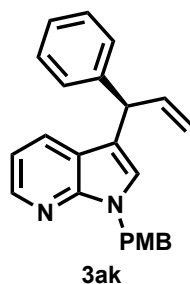

Compound **3ak** was prepared according to general procedure using **1a** (67.8 mg,

0.505 mmol) and **2k** (178.8 mg, 0.7503 mmol). The crude reaction mixture was purified by column chromatography using toluene/EtOAc (98/2) to afford **3ak** (129.2 mg, 0.3645 mmol, 72% yield, 98% ee) as a brown oil. The ee was measured by HPLC (Chiralcel OZ-H column, 1.0 mL/min, hexane/2-propanol = 99/1, 230 nm,  $t_1$  = 20.3 min (*major*),  $t_2$  = 22.5 min (*minor*));  $[\alpha]^{26}_D -14$  ( $c$  0.55, CHCl<sub>3</sub>) for 97% ee. <sup>1</sup>H NMR (500 MHz, CDCl<sub>3</sub>)  $\delta$  8.30 (dd,  $J$  = 4.6, 1.7 Hz, 1H), 7.59 (dd,  $J$  = 8.1, 1.2 Hz, 1H), 7.31-7.26 (m, 2H), 7.25-7.12 (m, 5H), 6.94 (dd,  $J$  = 7.5, 4.9 Hz, 1H), 6.90 (s, 1H), 6.83 (d,  $J$  = 9.2 Hz, 2H), 6.33-6.23 (m, 1H), 5.41 (d,  $J$  = 14.9 Hz, 1H), 5.35 (d,  $J$  = 15.5 Hz, 1H), 5.20-5.15 (m, 1H), 5.08-5.00 (m, 1H), 4.89 (d,  $J$  = 6.9 Hz, 1H), 3.77 (s, 3H); <sup>13</sup>C{<sup>1</sup>H} NMR (126 MHz, CDCl<sub>3</sub>)  $\delta$  159.0, 148.2, 143.0, 142.7, 140.1, 130.0, 128.7, 128.4, 128.3, 128.1, 126.4, 125.8, 119.5, 115.9, 115.7, 115.2, 114.0, 55.2, 47.2, 47.1; IR (neat, cm<sup>-1</sup>) 3059, 3027, 3000, 2956, 2932, 2836, 1725, 1636, 1612, 1597, 1513, 1487, 1451, 1358, 1303, 1249, 1175, 1035, 919, 819, 756, 702; HRMS (FAB)  $m/z$  [M+H]<sup>+</sup> calcd for C<sub>24</sub>H<sub>23</sub>N<sub>2</sub>O 355.1805; found 355.1805.

**(R)-3-(1-(*o*-Tolyl)allyl)-1H-pyrrolo[2,3-*b*]pyridine (3da)**

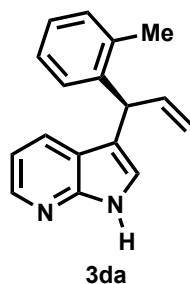

Compound **3da** was prepared according to general procedure using **1d** (72.4 mg, 0.489 mmol) and **2a** (87.7 mg, 0.742 mmol). The crude reaction mixture was purified by column chromatography using toluene/EtOAc (2/1) to afford **3da** (58.0 mg, 0.234 mmol, 48% yield, >99.5% ee) as a pale yellow solid (mp 127.1-127.7 °C). The ee was measured by HPLC (Chiralcel OJ-H column, 1.0 mL/min, hexane/2-propanol = 95/5, 230 nm,  $t_1$  = 14.3 min (*minor*),  $t_2$  = 15.9 min (*major*));  $[\alpha]^{25}_D +21$  ( $c$  1.05, CHCl<sub>3</sub>) for >99.5% ee. <sup>1</sup>H NMR (500 MHz, CDCl<sub>3</sub>)  $\delta$  10.74 (s, 1H), 8.27 (dd,  $J$  = 4.6, 1.5 Hz, 1H), 7.69-7.62 (m, 1H), 7.22-7.10 (m, 4H), 7.01-6.94 (m, 2H), 6.30 (ddd,  $J$  = 16.6, 10.0, 6.6 Hz, 1H), 5.23 (d,  $J$  = 10.3 Hz, 1H), 5.11 (d,  $J$  = 6.3 Hz, 1H), 4.98 (d,  $J$  = 17.2 Hz, 1H), 2.34 (s, 3H); <sup>13</sup>C{<sup>1</sup>H} NMR (126 MHz, CDCl<sub>3</sub>)  $\delta$  149.3, 142.5, 140.6, 139.4, 136.1, 130.4, 128.13, 128.10, 126.4, 126.0, 123.5, 119.7, 116.1, 116.0, 115.3, 42.9, 19.5; IR (KBr, cm<sup>-1</sup>) 3083, 2891, 1636, 1606, 1581, 1488, 1458, 1418, 1335, 1294, 1256, 1120, 997, 918, 897, 795, 767, 753, 726, 647, 505; HRMS (FAB)  $m/z$  [M+H]<sup>+</sup> calcd for C<sub>17</sub>H<sub>17</sub>N<sub>2</sub> 249.1386; found 249.1387.

**(R)-5-Chloro-3-(1-phenylallyl)-1H-pyrrolo[2,3-*b*]pyridine (3al)**

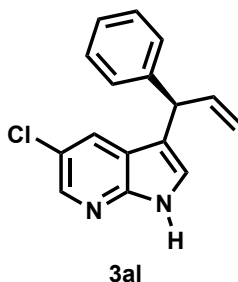

Compound **3al** was prepared according to general procedure using **1a** (67.4 mg, 0.502 mmol) and **2l** (114.0 mg, 0.7471 mmol). The crude reaction mixture was purified by column chromatography using toluene/EtOAc (9/1) followed by hexane/acetone (7/3) to afford **3al** (43.9 mg, 0.163 mmol, 33% yield, 99% ee) as a yellow oil. The ee was measured by HPLC (Chiralcel OJ-3 column, 1.0 mL/min, hexane/2-propanol = 95/5, 230 nm,  $t_1$  = 10.9 min (*minor*),  $t_2$  = 13.4 min (*major*));  $[\alpha]^{26}_D +23$  ( $c$  0.41, CHCl<sub>3</sub>) for 99% ee. <sup>1</sup>H NMR (500 MHz, CDCl<sub>3</sub>)  $\delta$  10.65 (s, 1H), 8.22 (d,  $J$  = 2.3 Hz, 1H), 7.64 (d,  $J$  = 2.3 Hz, 1H), 7.35-7.29 (m, 2H), 7.29-7.22 (m, 3H), 7.07 (d,  $J$  = 1.2 Hz, 1H), 6.31 (ddd,  $J$  = 17.2, 10.3, 7.0 Hz, 1H), 5.27-5.21 (m, 1H), 5.12-5.04 (m, 1H), 4.88 (d,  $J$  = 7.5 Hz, 1H); <sup>13</sup>C{<sup>1</sup>H} NMR (126 MHz, CDCl<sub>3</sub>)  $\delta$  147.5, 142.2, 141.2, 139.6, 128.6, 128.3, 127.6, 126.7, 124.9, 123.3, 120.3, 116.6, 116.2, 46.9; IR (neat, cm<sup>-1</sup>) 3154, 3029, 2915, 2874, 1719, 1636, 1601, 1573, 1477, 1452, 1406, 1289, 1251, 1107, 995, 914, 884, 767, 753, 702, 670, 661, 631; HRMS (FAB)  $m/z$  [M+H]<sup>+</sup> calcd for C<sub>16</sub>H<sub>14</sub>ClN<sub>2</sub> 269.0840; found 269.0841.

**(R)-5-Bromo-3-(1-(*o*-tolyl)allyl)-1H-pyrrolo[2,3-*b*]pyridine (3dm)**

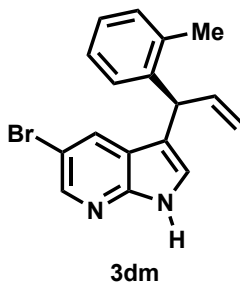

Compound **3dm** was prepared according to general procedure using **1d** (74.3 mg, 0.501 mmol) and **2m** (147.8 mg, 0.7501 mmol). The crude reaction mixture was purified by column chromatography using hexane/EtOAc (7/3) followed by toluene/EtOAc (9/1) to afford **3dm** (76.9 mg, 0.235 mmol, 47% yield, 99% ee) as a pale yellow solid (m.p. 131.9 °C-132.3 °C). The ee was measured by HPLC (Chiralcel OZ-H column, 1.0 mL/min, hexane/2-propanol = 98/2, 230 nm,  $t_1$  = 6.0 min (*major*),  $t_2$  = 7.6 min (*minor*));  $[\alpha]^{24}_D +53$  ( $c$  1.03, CHCl<sub>3</sub>) for 99% ee. <sup>1</sup>H NMR (500 MHz, CDCl<sub>3</sub>)  $\delta$  10.64 (s, 1H), 8.31 (d,  $J$  = 1.7 Hz, 1H), 7.79 (d,  $J$  = 1.7 Hz, 1H), 7.24-7.10 (m, 4H), 6.94 (s, 1H), 6.27 (ddd,  $J$  = 16.6, 10.6, 6.4 Hz, 1H), 5.25 (d,  $J$  = 9.8 Hz, 1H), 5.05 (d,  $J$  = 6.3 Hz, 1H), 4.96 (d,  $J$  = 17.2 Hz,

1H), 2.32 (s, 3H);  $^{13}\text{C}\{^1\text{H}\}$  NMR (126 MHz,  $\text{CDCl}_3$ )  $\delta$  147.6, 143.1, 140.1, 139.0, 136.1, 130.6, 130.3, 127.9, 126.7, 126.1, 125.2, 121.4, 116.3, 115.9, 111.1, 42.6, 19.5; IR (KBr,  $\text{cm}^{-1}$ ) 3147, 2847, 1636, 1603, 1568, 1481, 1461, 1404, 1287, 1251, 1209, 1107, 1083, 997, 921, 906, 879, 749, 724, 694, 634, 612, 549, 452; HRMS (FAB)  $m/z$   $[\text{M}+\text{H}]^+$  calcd for  $\text{C}_{17}\text{H}_{16}\text{BrN}_2$  327.0491; found 327.0495.

#### 4. Procedure for the Protonation of 7-Azaindoles **2b** with Trifluoroacetic Acid

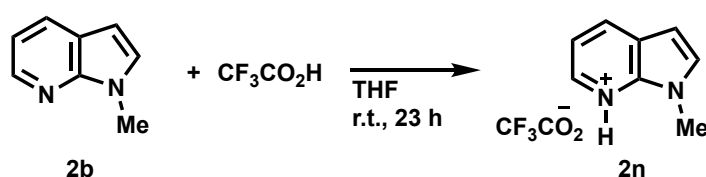

To a solution of **2b** (194.9 mg, 1.475 mmol) in THF (3 mL) was added trifluoroacetic acid (227.4 mg, 1.995 mmol) at r.t. After the mixture was stirred at the same temperature for 23 h, it was concentrated on a rotary evaporator to give **2n** (329.4 mg, 1.338 mmol, 91% yield) as an orange-pink solid (m.p. 55.1 °C-55.3 °C).

Compound **2n**:  $^1\text{H}$  NMR (500 MHz,  $\text{CDCl}_3$ )  $\delta$  8.56 (dd,  $J = 5.8, 1.2$  Hz, 1H), 8.34 (dd,  $J = 8.1, 1.1$  Hz, 1H), 7.38 (dd,  $J = 8.0, 5.8$  Hz, 1H), 7.33 (d,  $J = 3.4$  Hz, 1H), 6.72 (d,  $J = 3.5$  Hz, 1H), 4.09 (s, 3H);  $^{13}\text{C}\{^1\text{H}\}$  NMR (126 MHz,  $\text{CDCl}_3$ )  $\delta$  161.6 (q,  $J_{\text{C-F}} = 37.4$  Hz), 140.7, 135.8, 135.6, 132.3, 125.2, 116.0 (q,  $J_{\text{C-F}} = 287.7$  Hz), 115.3, 102.2, 33.6;  $^{19}\text{F}$  NMR (471 MHz,  $\text{CDCl}_3$ )  $\delta$  -75.6; IR (KBr,  $\text{cm}^{-1}$ ) 3104, 2954, 2822, 2378, 1789, 1685, 1646, 1624, 1527, 1418, 1341, 1271, 1207, 1195, 1134, 884, 834, 804, 734, 723, 709, 526. After recrystallization of **2n** from hexane/ $\text{CHCl}_3$ , a crystal structure was obtained (Figure S1, Tables S1-S3).

#### 5. Procedure for the Asymmetric Allylation of 7-Azaindole **2n** with Allylic Alcohol **1a** (Scheme 6)

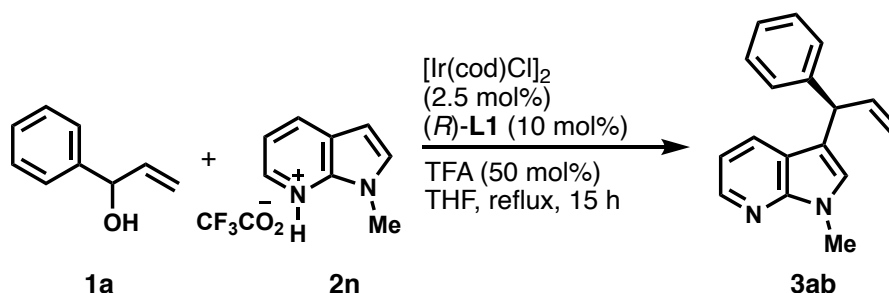

A mixture of  $[\text{Ir}(\text{cod})\text{Cl}]_2$  (8.9 mg, 0.132 mmol) and (*R*)-**L1** (26.3 mg, 0.0518 mmol) in THF (2.0 mL) was stirred at room temperature for 15 min. To the mixture was added **2n** (185.0 mg, 0.7515 mmol), **1a** (68.9 mg, 0.513 mmol), and TFA (29.2 mg, 0.256 mmol), and the mixture was stirred under reflux for 15 h. After the solvent was removed on a rotary evaporator, the residue was subjected to column chromatography (silica gel, toluene/EtOAc = 98/2) to give compounds **3ab** (102.6 mg, 0.4132 mmol, 81% yield, 99% ee).

## 6. Procedure for the Deprotection of 7-Azaindoles **3ak** (Scheme 6)

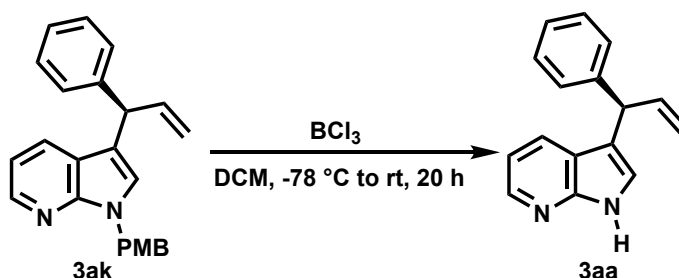

To a solution of **3ak** (129.7 mg, 0.3659 mmol, 98% ee) in DCM (2.0 mL) was added  $\text{BCl}_3$  (1.0 M solution in THF, 2.2 mL, 2.2 mmol) at  $-78\text{ }^\circ\text{C}$ . After the mixture was stirred at the same temperature for 30 min, it was warmed to  $-20\text{ }^\circ\text{C}$ , and then stirred for 1 h before warming to room temperature. After the mixture was stirred for 20 h, MeOH was added. The solution was concentrated on a rotary evaporator. The residue was subjected to column chromatography (silica gel,  $\text{CHCl}_3/\text{MeOH} = 9/1$  followed by hexane/acetone = 2/1) to give compound **3aa** (70.0 mg, 0.299 mmol, 82% yield, 99% ee) as a brown oil.

## 7. Procedure for the Metathesis Reaction of 7-Azaindoles **3ab** with Methyl Acrylate

(Scheme 6)

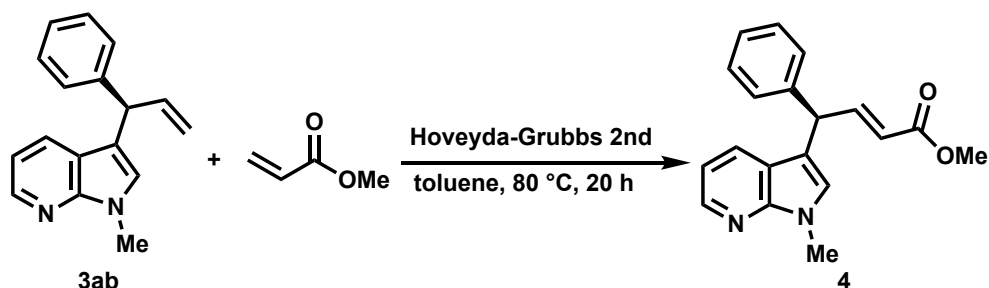

To a solution of Hoveyda-Grubbs 2nd-generation catalyst (19.1 mg, 0.0307 mmol) in toluene (1.0 mL) was added the solution of **3ab** (73.1 mg, 0.294 mmol, 99% ee) and methyl acrylate (76.3mg, 0.886 mmol) in toluene (3.0 mL) at room temperature. After the mixture was stirred at 80 °C for 20 h, it was concentrated on a rotary evaporator. The residue was subjected to column chromatography (silica gel, hexane/EtOAc = 7/3) to give compound **4** (64.1 mg, 0.209 mmol, 71% yield, 99% ee) as a brown oil.

Compound **4**: The ee was measured by HPLC (Chiralcel OD-H column, 1.0 mL/min, hexane/2-propanol = 95/5, 230 nm,  $t_1$  = 11.9 min (*minor*),  $t_2$  = 16.5 min (*major*));  $[\alpha]^{26}_D$  -4 ( $c$  0.99, CHCl<sub>3</sub>) for 99% ee. <sup>1</sup>H NMR (500 MHz, CDCl<sub>3</sub>)  $\delta$  8.31 (dd,  $J$  = 4.6, 1.7 Hz, 1H), 7.58 (dd,  $J$  = 8.0, 1.7 Hz, 1H), 7.43 (dd,  $J$  = 15.5, 7.2 Hz, 1H), 7.33 (t,  $J$  = 7.5 Hz, 2H), 7.30–7.22 (m, 3H), 6.96 (dd,  $J$  = 7.5, 4.9 Hz, 1H), 6.87 (s, 1H), 5.81 (dd,  $J$  = 15.5, 1.7 Hz, 1H), 5.06 (d,  $J$  = 7.5 Hz, 1H), 3.84 (s, 3H), 3.73 (s, 3H); <sup>13</sup>C {<sup>1</sup>H} NMR (126 MHz, CDCl<sub>3</sub>)  $\delta$  167.0, 149.6, 148.2, 143.1, 140.8, 128.7, 128.4, 127.7, 127.3, 127.1, 121.9, 119.2, 115.3, 113.5, 51.6, 45.5, 31.1; IR (neat, cm<sup>-1</sup>) 3059, 3027, 2949, 1721, 1653, 1599, 1538, 1492, 1459, 1436, 1409, 1349, 1298, 1272, 1230, 1194, 1169, 1143, 1038, 985, 801, 756, 731, 702; HRMS (FAB)  $m/z$  [M+H]<sup>+</sup> calcd for C<sub>19</sub>H<sub>19</sub>N<sub>2</sub>O<sub>2</sub> 307.1441; found 307.1442.

**8. Procedure for the Hydroboration of 7-Azaindoles 3ab Followed by Oxidation (Scheme 6)**

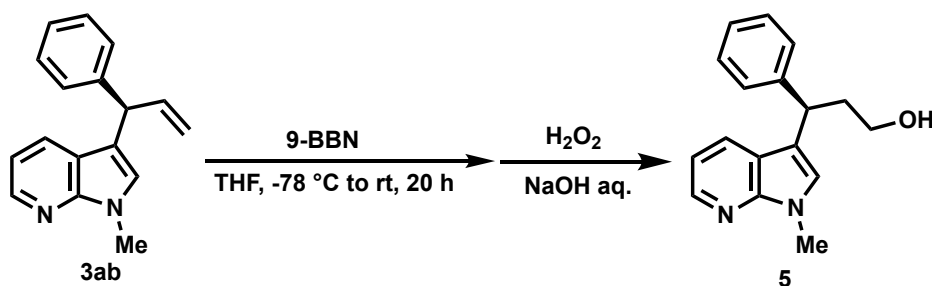

To a solution of **3ab** (74.8 mg, 0.301 mmol, 99% ee) in THF (1.0 mL) was added 9-BBN (1.25 mL, 0.5 M solution in THF, 0.625 mmol) at  $-78\text{ }^\circ\text{C}$ . After the mixture was warmed to room temperature, it was stirred for 20 h. EtOH (0.49 mL), 3 M NaOH aq. (0.25 mL), and  $\text{H}_2\text{O}_2$  (30% in water, 0.25 mL, 2.2 mmol) were added to the mixture at  $0\text{ }^\circ\text{C}$ . The mixture was extracted with 1M NaOH and  $\text{Et}_2\text{O}$ , and then sat.  $\text{NH}_4\text{Cl}$  and  $\text{Et}_2\text{O}$ . The combined organic extracts were dried over  $\text{MgSO}_4$ , and concentrated on a rotary evaporator. The residue was subjected to column chromatography (silica gel, hexane/EtOAc = 1/2) to give compound **5** (70.3 mg, 0.264 mmol, 88% yield, 99% ee) as a brown oil.

Compound **5**: The ee was measured by HPLC (Chiralpak AD-3 column, 1.0 mL/min, hexane/2-propanol = 90/10, 230 nm,  $t_1 = 35.7$  min (*major*),  $t_2 = 38.8$  min (*minor*));  $[\alpha]^{24}_{\text{D}} -21$  ( $c$  0.49,  $\text{CHCl}_3$ ) for 99% ee.  $^1\text{H}$  NMR (500 MHz,  $\text{CDCl}_3$ )  $\delta$  8.25 (dd,  $J = 4.6, 1.4$  Hz, 1H), 7.67 (dd,  $J = 8.0, 1.4$  Hz, 1H), 7.33–7.23 (m, 4H), 7.21–7.15 (m, 1H), 7.01 (s, 1H), 6.93–6.88 (m, 1H), 4.36 (t,  $J = 7.7$  Hz, 1H), 3.83 (s, 3H), 3.72–3.58 (m, 2H), 2.50–2.38 (m, 1H), 2.31–2.20 (m, 1H), 1.92 (br, 1H);  $^{13}\text{C}\{^1\text{H}\}$  NMR (126 MHz,  $\text{CDCl}_3$ )  $\delta$  148.1, 144.3, 142.8, 128.5, 127.8, 127.7, 126.3, 125.8, 119.7, 116.7, 114.9, 60.9, 39.1, 38.4, 31.1; IR (neat,  $\text{cm}^{-1}$ ) 3338, 3060, 3026, 2932, 2880, 1600, 1575, 1538, 1492, 1461, 1410, 1348, 1295, 1143, 1038, 1011, 798, 759, 705, 664, 646, 585, 548; HRMS (FAB)  $m/z$   $[\text{M}+\text{H}]^+$  calcd for  $\text{C}_{17}\text{H}_{19}\text{N}_2\text{O}$  267.1492; found 267.1491.

## 9. Procedure for the Hydrogenation of 7-Azaindole **3ab** (Scheme 6)

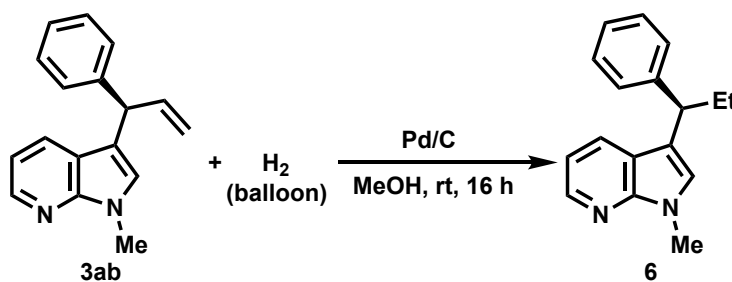

To Pd/C (15.0 mg, 10%, 0.014 mmol) was added the solution of **3ab** (86.9 g, 0.35

mmol, 99% ee) in MeOH (2.0 mL) at rt. After the mixture was stirred under a hydrogen atmosphere at rt for 16 h, Pd/C was filtered off by celite, and the filtrate was concentrated on a rotary evaporator. The residue was subjected to column chromatography (silica gel, toluene/EtOAc = 98/2) to give compound **6** (77.8 mg, 0.311 mmol, 89% yield, 96% ee) as a colorless oil.

Compound **6**: The ee was measured by HPLC (OJ-3 column, 1.0 mL/min, hexane/2-propanol = 99/1, 230 nm,  $t_1$  = 13.3 min (*minor*),  $t_2$  = 20.2 min (*major*));  $[\alpha]^{24}_{\text{D}} - 36$  ( $c$  0.55, CHCl<sub>3</sub>) for 96% ee. <sup>1</sup>H NMR (500 MHz, CDCl<sub>3</sub>)  $\delta$  8.26 (dd,  $J$  = 4.6, 1.7 Hz, 1H), 7.65 (dd,  $J$  = 8.1, 1.7 Hz, 1H), 7.30–7.23 (m, 4H), 7.21–7.14 (m, 1H), 7.00 (s, 1H), 6.91 (dd,  $J$  = 8.1, 4.6 Hz, 1H), 4.00 (t,  $J$  = 7.4 Hz, 1H), 3.84 (s, 3H), 2.26–2.14 (m, 1H), 2.08–1.96 (m, 1H), 0.94 (t,  $J$  = 7.2, 3H); <sup>13</sup>C{<sup>1</sup>H} NMR (126 MHz, CDCl<sub>3</sub>)  $\delta$  148.1, 144.9, 142.7, 128.3, 127.9, 127.6, 126.1, 125.7, 119.8, 117.3, 114.8, 44.8, 31.0, 28.8, 12.7; IR (neat, cm<sup>-1</sup>) 3058, 3026, 2962, 2929, 2871, 1599, 1571, 1537, 1491, 1459, 1409, 1348, 1297, 1146, 798, 771, 704, 581, 545; HRMS (FAB)  $m/z$  [M+H]<sup>+</sup> calcd for C<sub>17</sub>H<sub>19</sub>N<sub>2</sub> 251.1543; found 251.1545.

**10. The data for X-ray crystal structure of compound [CF<sub>3</sub>COO][HC<sub>8</sub>N<sub>2</sub>H<sub>9</sub>][CF<sub>3</sub>COOH]**

Colorless crystals of [CF<sub>3</sub>COO][HC<sub>8</sub>N<sub>2</sub>H<sub>9</sub>][CF<sub>3</sub>COOH] suitable for X-ray crystallographic analysis were obtained by recrystallization from hexane/CHCl<sub>3</sub>. The ORTEP drawing of [CF<sub>3</sub>COO][HC<sub>8</sub>N<sub>2</sub>H<sub>9</sub>][CF<sub>3</sub>COOH] is shown in Figure S1. The crystal structure has been deposited at the Cambridge Crystallographic Centre (deposition number: CCDC 2080098). The data can be obtained free of charge via [www.ccdc.cam.ac.uk/data\\_request/cif](http://www.ccdc.cam.ac.uk/data_request/cif).

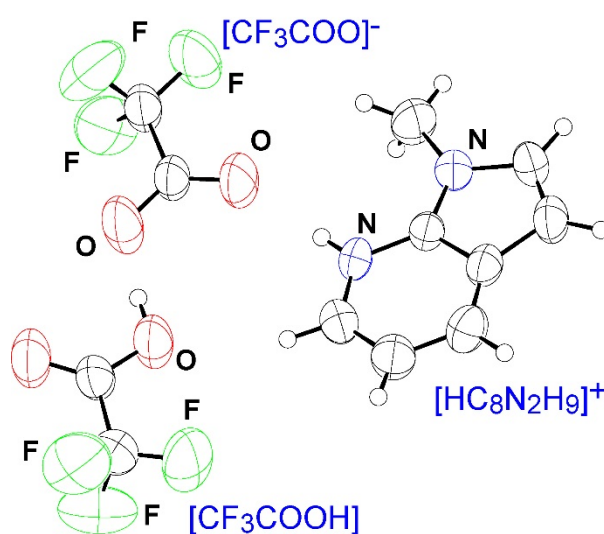

**Figure S1.** ORTEP illustration of [CF<sub>3</sub>COO][HC<sub>8</sub>N<sub>2</sub>H<sub>9</sub>][CF<sub>3</sub>COOH] with thermal ellipsoids drawn at the 50% probability level.

**Table S1.** Crystal data of [CF<sub>3</sub>COO][HC<sub>8</sub>N<sub>2</sub>H<sub>9</sub>][CF<sub>3</sub>COOH].

|                      |                                                                              |
|----------------------|------------------------------------------------------------------------------|
| Empirical Formula    | C <sub>12</sub> H <sub>10</sub> F <sub>6</sub> N <sub>2</sub> O <sub>4</sub> |
| Formula Weight       | 360.21                                                                       |
| Crystal Color, Habit | colorless, prism                                                             |
| Crystal Dimensions   | 0.5 × 0.5 × 0.5 mm                                                           |
| Crystal System       | triclinic                                                                    |
| Lattice Type         | Primitive                                                                    |
| Lattice Parameters   | a = 7.449(5) Å<br>b = 10.164(8) Å<br>c = 11.085(6) Å<br>α = 115.47(2) °      |

|                         |                              |
|-------------------------|------------------------------|
|                         | $\beta = 98.08(2)^\circ$     |
|                         | $\gamma = 92.02(3)^\circ$    |
|                         | $V = 745.9(8) \text{ \AA}^3$ |
| Space Group             | P-1 (#2)                     |
| Z value                 | 2                            |
| $D_{\text{calc}}$       | 1.604 g/cm <sup>3</sup>      |
| $F_{000}$               | 364.00                       |
| $\mu(\text{MoK}\alpha)$ | 1.667 cm <sup>-1</sup>       |

**Table S2.** Intensity Measurements.

|                                                            |                                                                            |
|------------------------------------------------------------|----------------------------------------------------------------------------|
| Diffractometer                                             | R-AXIS RAPID                                                               |
| Radiation                                                  | MoK $\alpha$ ( $\lambda = 0.71075 \text{ \AA}$ )<br>graphite monochromated |
| Voltage, Current                                           | 50 kV, 90 mA                                                               |
| Temperature                                                | 23.0 °C                                                                    |
| Detector Aperture                                          | 460.0 x 256.0 mm                                                           |
| Data Images                                                | 44 exposures                                                               |
| $\omega$ oscillation Range ( $\chi = 45.0, \phi = 0.0$ )   | 130.0 – 190.0 °                                                            |
| Exposure Rate                                              | 30.0 sec./°                                                                |
| $\omega$ oscillation Range ( $\chi = 45.0, \phi = 180.0$ ) | 0.0 – 160.0 °                                                              |
| Exposure Rate                                              | 30.0 sec. /°                                                               |
| Detector Position                                          | 127.40 mm                                                                  |
| Pixel Size                                                 | 0.100 mm                                                                   |
| $2\theta_{\text{max}}$                                     | 54.9 °                                                                     |
| No. of Reflections Measured                                | Total: 7411<br>Unique: 3387 ( $R_{\text{int}} = 0.0308$ )                  |
| Corrections                                                | Lorentz-polarization<br>Absorption<br>(trans. factors: 0.936 – 0.967)      |

**Table S3.** Structure Solution and Refinement.

|                    |                                            |
|--------------------|--------------------------------------------|
| Structure Solution | Direct Methods (SHELXT Version 2018/2)     |
| Refinement         | Full-matrix least-squares on $F^2$ (SHELXL |
| Version 2018/3)    |                                            |

|                                       |                                                                                                                  |
|---------------------------------------|------------------------------------------------------------------------------------------------------------------|
| Function Minimized                    | $\Sigma w (F_o^2 - F_c^2)^2$                                                                                     |
| Least Squares Weights                 | $w = 1/[\sigma^2(F_o^2) + (0.1017 \cdot P)^2 + 0.0000 \cdot P]$<br>where $P = (\text{Max}(F_o^2, 0) + 2F_c^2)/3$ |
| 2 $\theta$ max cutoff                 | 54.9 °                                                                                                           |
| Anomalous Dispersion                  | All non-hydrogen atoms                                                                                           |
| No. Observations (All reflections)    | 3387                                                                                                             |
| No. Variables                         | 261                                                                                                              |
| Reflection/Parameter Ratio            | 12.98                                                                                                            |
| Residuals: R1 ( $I > 2.00\sigma(I)$ ) | 0.0632                                                                                                           |
| Residuals: R (All reflections)        | 0.1315                                                                                                           |
| Residuals: wR2 (All reflections)      | 0.2014                                                                                                           |
| Goodness of Fit Indicator             | 1.037                                                                                                            |
| Max Shift/Error in Final Cycle        | 0.000                                                                                                            |
| Maximum peak in Final Diff. Map       | 0.24 e <sup>-</sup> /Å <sup>3</sup>                                                                              |
| Minimum peak in Final Diff. Map       | -0.20 e <sup>-</sup> /Å <sup>3</sup>                                                                             |

## 11. The data for X-ray crystal structure of compound C<sub>17</sub>H<sub>15</sub>BrN<sub>2</sub>

Yellow crystals of C<sub>17</sub>H<sub>15</sub>BrN<sub>2</sub> suitable for X-ray crystallographic analysis were obtained by recrystallization from hexane/EtOAc. The ORTEP drawing of C<sub>17</sub>H<sub>15</sub>BrN<sub>2</sub> is shown in Figure S2. The unit cell of C<sub>17</sub>H<sub>15</sub>BrN<sub>2</sub> consists of two type crystallographically distinct molecules which form dimer by *hydrogen bonding* of the hydrogen of N-H and the nitrogen of 7-azaindol. Nineteen hydrogen atoms, H2A, H3A, H4A, H5A, H6A, H8A, H8B, H8C, H10A, H10B, H18, H21, H22, H25A, H25B, H25C, H26, H27A, and H27B, were placed at calculated positions and refined using a riding model. The crystal structure has been deposited at the Cambridge Crystallographic Centre (deposition number: CCDC 2080099). The data can be obtained free of charge via [www.ccdc.cam.ac.uk/data\\_request/cif](http://www.ccdc.cam.ac.uk/data_request/cif).

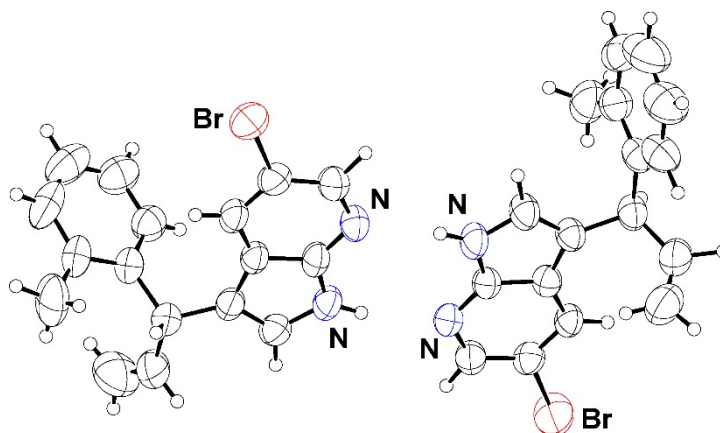

**Figure S2.** ORTEP illustration of  $C_{17}H_{15}BrN_2$  (two crystallographically independent molecules) with thermal ellipsoids drawn at the 50% probability level.

**Table S4.** Crystal data of  $C_{17}H_{15}BrN_2$ .

|                         |                                                                                                                           |
|-------------------------|---------------------------------------------------------------------------------------------------------------------------|
| Empirical Formula       | $C_{17}H_{15}BrN_2$                                                                                                       |
| Formula Weight          | 327.22                                                                                                                    |
| Crystal Color, Habit    | yellow, block                                                                                                             |
| Crystal Dimensions      | $0.8 \times 0.8 \times 0.5$ mm                                                                                            |
| Crystal System          | monoclinic                                                                                                                |
| Lattice Type            | Primitive                                                                                                                 |
| Lattice Parameters      | $a = 8.928(5)$ Å<br>$b = 17.983(10)$ Å<br>$c = 9.771(6)$ Å<br>$\beta = 93.34(2)^\circ$<br>$V = 1566.1(16)$ Å <sup>3</sup> |
| Space Group             | $P2_1$ (#4)                                                                                                               |
| Z value                 | 4                                                                                                                         |
| $D_{\text{calc}}$       | $1.388$ g/cm <sup>3</sup>                                                                                                 |
| $F_{000}$               | 664.00                                                                                                                    |
| $\mu(\text{MoK}\alpha)$ | $26.241$ cm <sup>-1</sup>                                                                                                 |

**Table S5.** Intensity Measurements.

|                |                                       |
|----------------|---------------------------------------|
| Diffractometer | R-AXIS RAPID                          |
| Radiation      | MoK $\alpha$ ( $\lambda = 0.71075$ Å) |

|                                                               |                                                                                                                               |
|---------------------------------------------------------------|-------------------------------------------------------------------------------------------------------------------------------|
|                                                               | graphite monochromated                                                                                                        |
| Voltage, Current                                              | 50kV, 90mA                                                                                                                    |
| Temperature                                                   | 23.0 °C                                                                                                                       |
| Detector Aperture                                             | 460.0 x 256.0 mm                                                                                                              |
| Data Images                                                   | 44 exposures                                                                                                                  |
| $\omega$ oscillation Range ( $\chi = 45.0$ , $\phi = 0.0$ )   | 130.0 – 190.0 °                                                                                                               |
| Exposure Rate                                                 | 30.0 sec./°                                                                                                                   |
| $\omega$ oscillation Range ( $\chi = 45.0$ , $\phi = 180.0$ ) | 0.0 – 160.0 °                                                                                                                 |
| Exposure Rate                                                 | 30.0 sec. /°                                                                                                                  |
| Detector Position                                             | 127.40 mm                                                                                                                     |
| Pixel Size                                                    | 0.100 mm                                                                                                                      |
| $2\theta_{\max}$                                              | 54.9 °                                                                                                                        |
| No. of Reflections Measured                                   | Total: 15326<br>Unique: 7100 ( $R_{\text{int}} = 0.0722$ )                                                                    |
| Corrections                                                   | Lorentz-polarization<br>Absorption<br>(trans. factors: 0.188 – 0.269)<br>Secondary Extinction<br>(coefficient: 1.19700 e-002) |

**Table S6.** Structure Solution and Refinement.

|                                               |                                                                  |
|-----------------------------------------------|------------------------------------------------------------------|
| Structure Solution                            | Direct Methods (SHELXT Version 2018/2)                           |
| Refinement                                    | Full-matrix least-squares on $F^2$ (SHELXL                       |
| Version 2018/3)                               |                                                                  |
| Function Minimized                            | $\Sigma w (F_o^2 - F_c^2)^2$                                     |
| Least Squares Weights                         | $w = 1/[\sigma^2(F_o^2) + (0.00611 \cdot P)^2 + 0.0000 \cdot P]$ |
| where $P = (\text{Max}(F_o^2, 0) + 2F_c^2)/3$ |                                                                  |
| $2\theta_{\max}$ cutoff                       | 54.9°                                                            |
| Anomalous Dispersion                          | All non-hydrogen atoms                                           |
| No. Observations (All reflections)            | 7098                                                             |
| No. Variables                                 | 406                                                              |
| Reflection/Parameter Ratio                    | 17.48                                                            |
| Residuals: $R_1$ ( $I > 2.00\sigma(I)$ )      | 0.0513                                                           |
| Residuals: $R$ (All reflections)              | 0.0920                                                           |
| Residuals: $wR_2$ (All reflections)           | 0.1400                                                           |

|                                 |                                        |
|---------------------------------|----------------------------------------|
| Goodness of Fit Indicator       | 0.931                                  |
| Flack parameter                 | −0.004(11) (Parsons' quotients = 1347) |
| Max Shift/Error in Final Cycle  | 0.001                                  |
| Maximum peak in Final Diff. Map | 0.41 e <sup>−</sup> /Å <sup>3</sup>    |
| Minimum peak in Final Diff. Map | −0.37 e <sup>−</sup> /Å <sup>3</sup>   |

## 12. References

- [1] R. H. Crabtree, J. M. Quirk, H. Felkin, T. Fillebeen-Khan, *Synth. React. Inorg. Met.-Org. Chem.* 1982, **12**, 407–413.
- [2] C. Defieber, M. A. Ariger, P. Moriel, E. M. Carreira, *Angew. Chem., Int. Ed.* 2007, **46**, 3139–3143.
- [3] L. C. Burrows, L. T. Jesikiewicz, G. Lu, S. J. Geib, P. Liu, K. M. Brummond, *J. Am. Chem. Soc.* 2017, **139**, 15022–15032.
- [4] J. Y. Hamilton, D. Sarlah, E. M. Carreira, *Org. Synth.* 2015, **92**, 1–12.
- [5] P. Kannaboina, K. Anilkumar, S. Aravind, R. A. Vishwakarma, P. Das, *Org. Lett.* **2013**, *15*, 5718–5721.
- [6] S. Potavathri, A. S. Dumas, T. A. Dwight, G. R. Naumiec, J. M. Hammann, B. DeBoef, *Tetrahedron Lett.* 2008, **49**, 4050–4053.

### 13. <sup>1</sup>H, <sup>13</sup>C, and <sup>19</sup>F NMR Spectra, and Chiral HPLC Charts

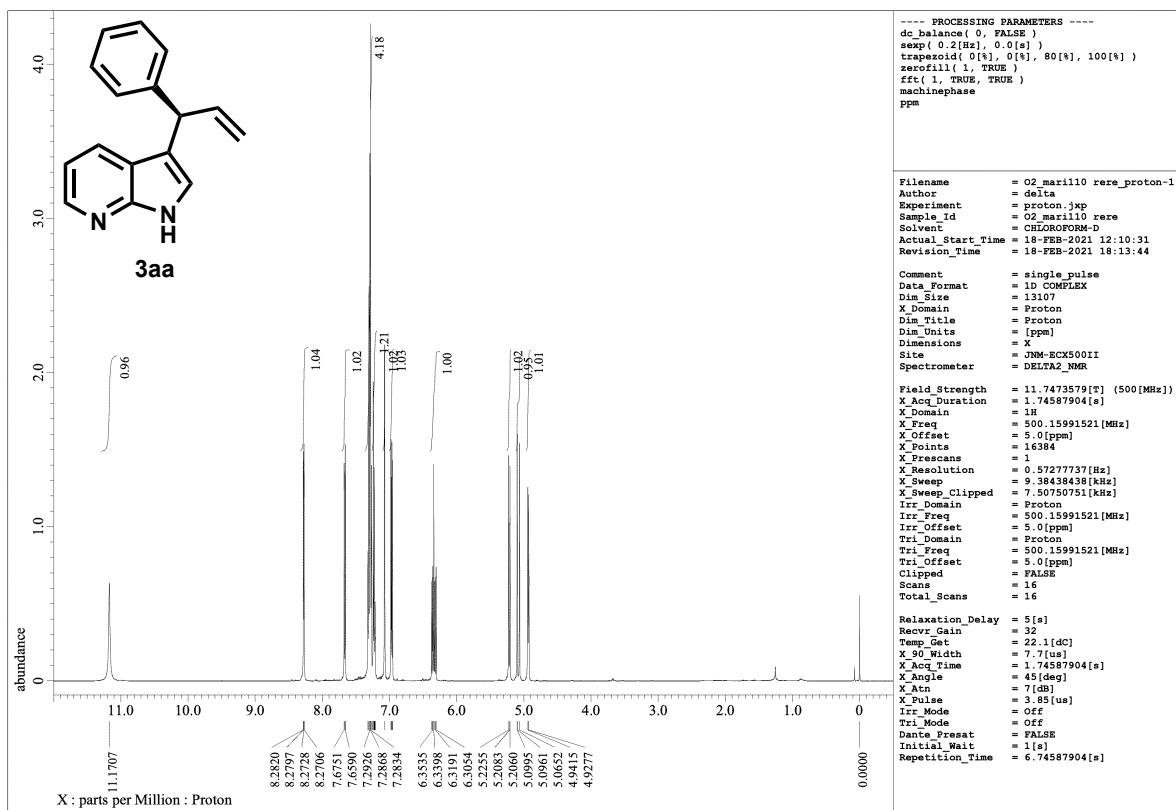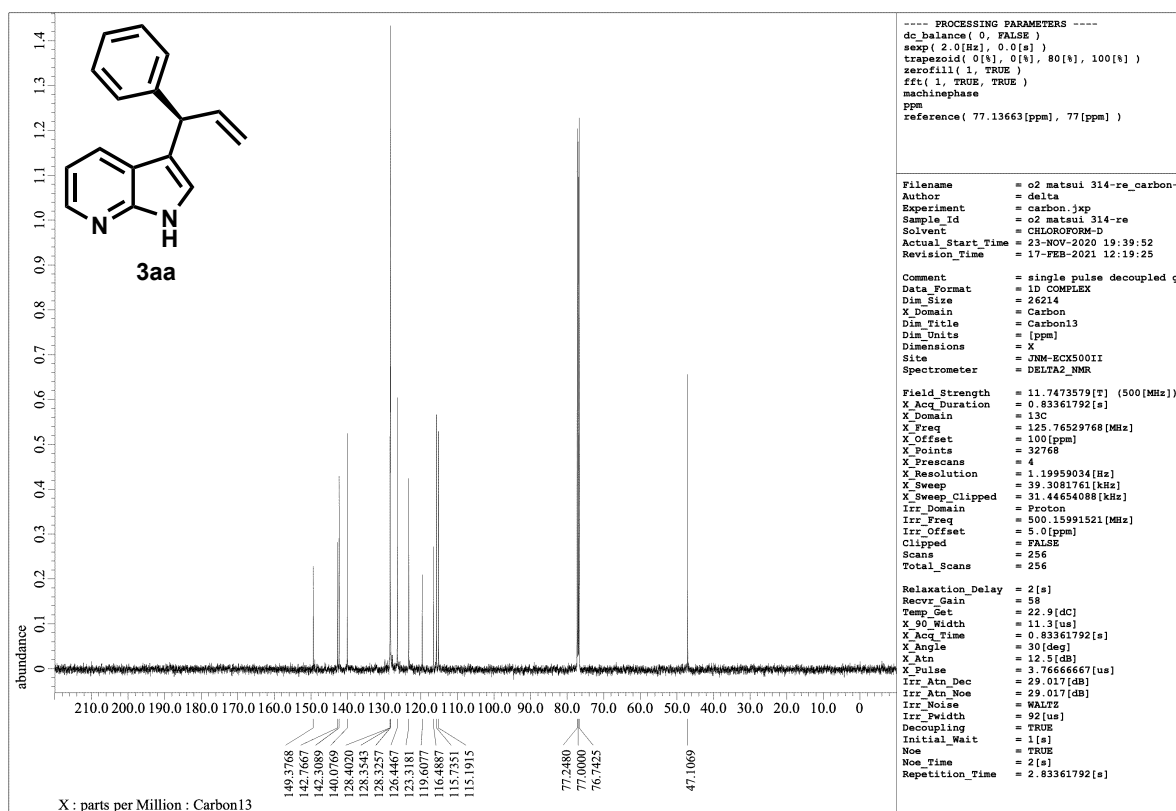

mV

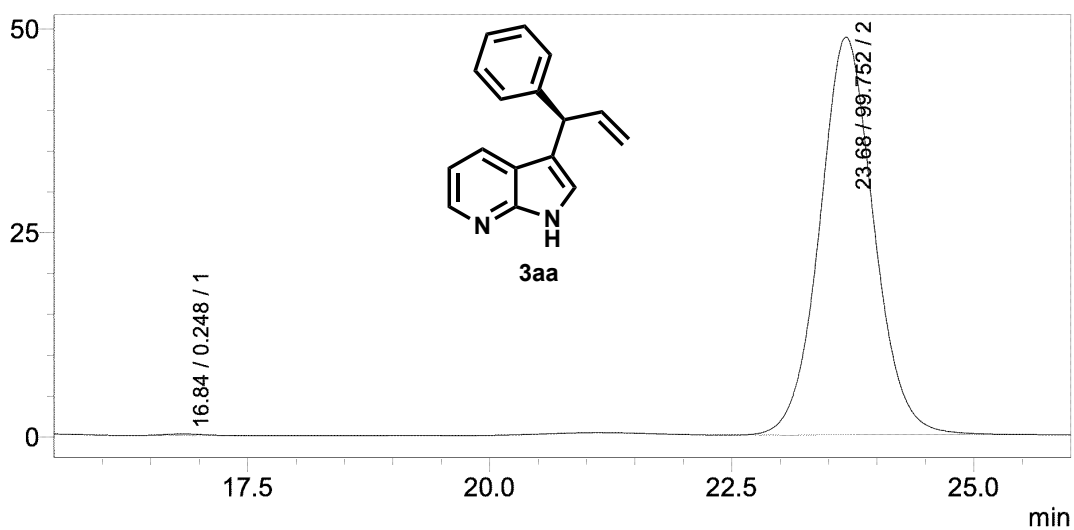

| Peak# | Ret. Time | Area%   |
|-------|-----------|---------|
| 1     | 16.84     | 0.248   |
| 2     | 23.68     | 99.752  |
| Total |           | 100.000 |

mV

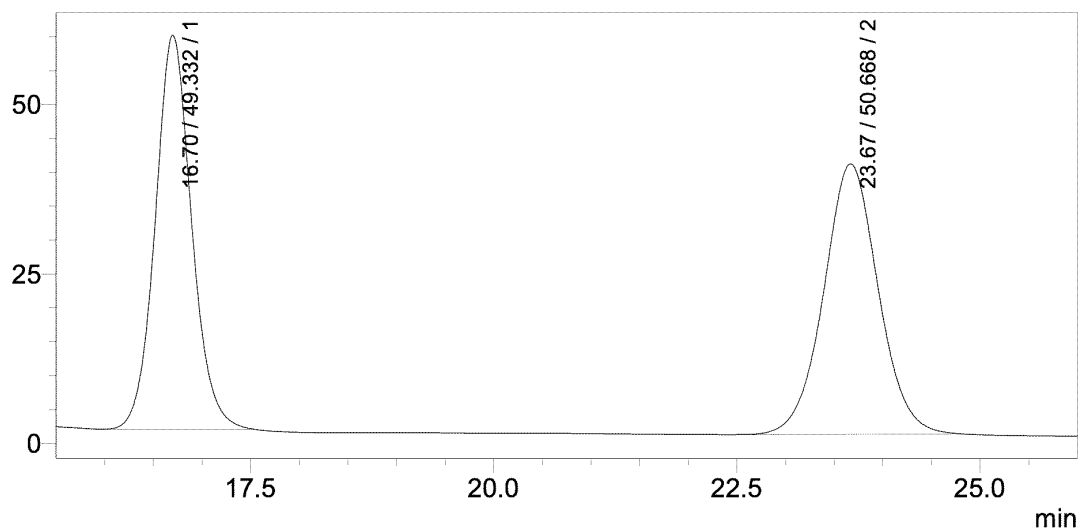

| Peak# | Ret. Time | Area%   |
|-------|-----------|---------|
| 1     | 16.70     | 49.332  |
| 2     | 23.67     | 50.668  |
| Total |           | 100.000 |

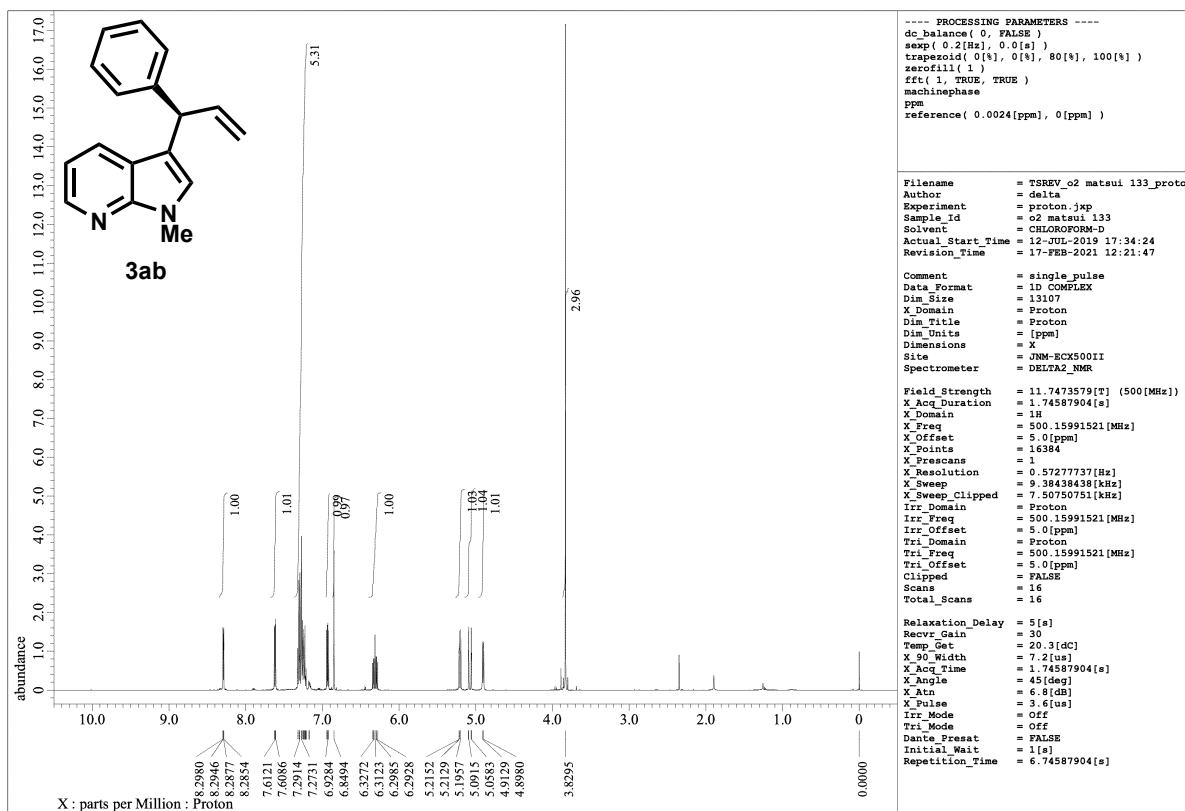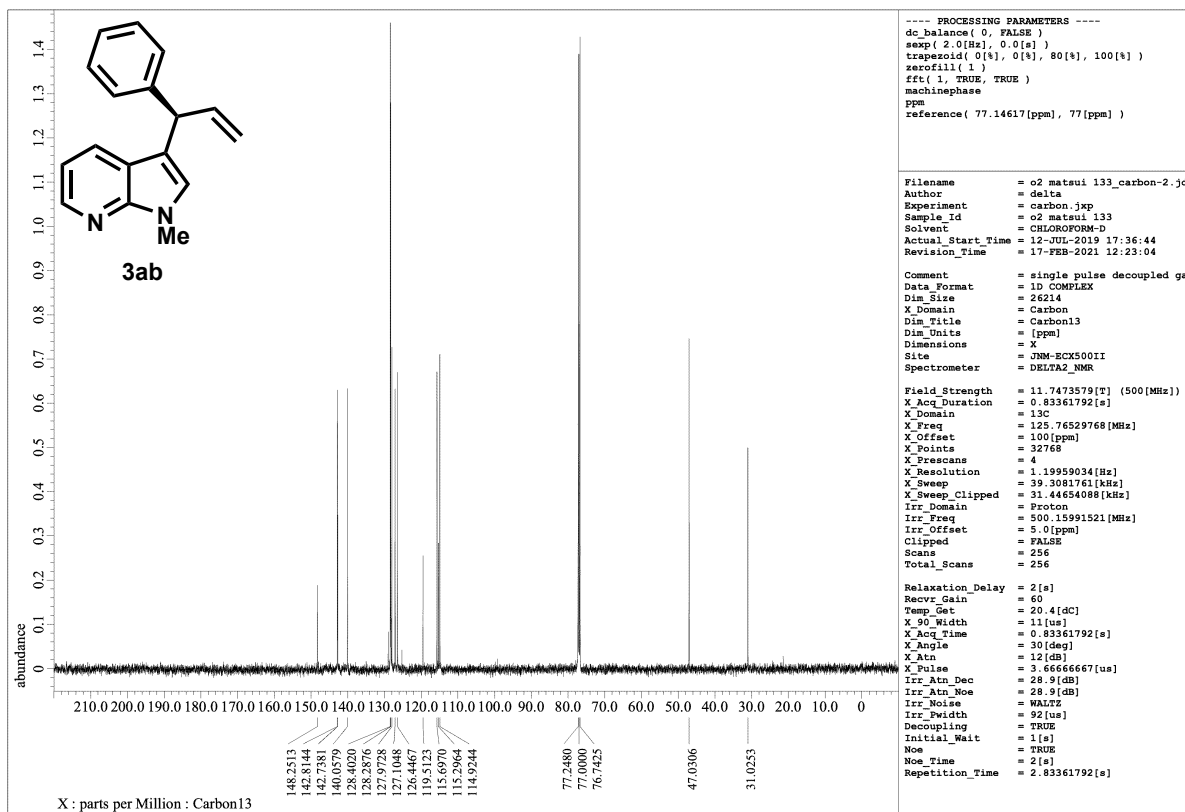

mV

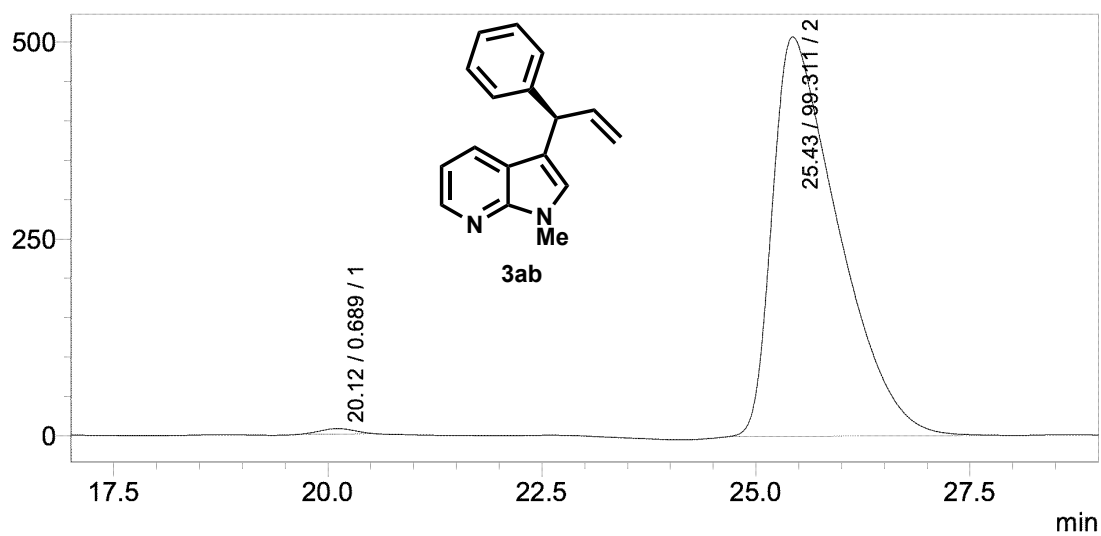

| Peak# | Ret. Time | Area%   |
|-------|-----------|---------|
| 1     | 20.12     | 0.689   |
| 2     | 25.43     | 99.311  |
| Total |           | 100.000 |

mV

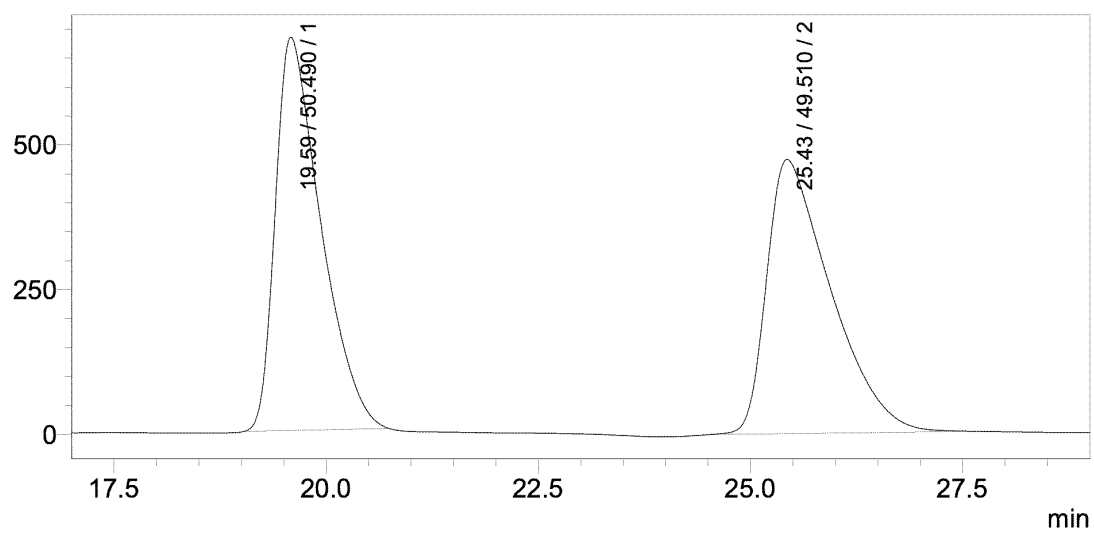

| Peak# | Ret. Time | Area%   |
|-------|-----------|---------|
| 1     | 19.59     | 50.490  |
| 2     | 25.43     | 49.510  |
| Total |           | 100.000 |

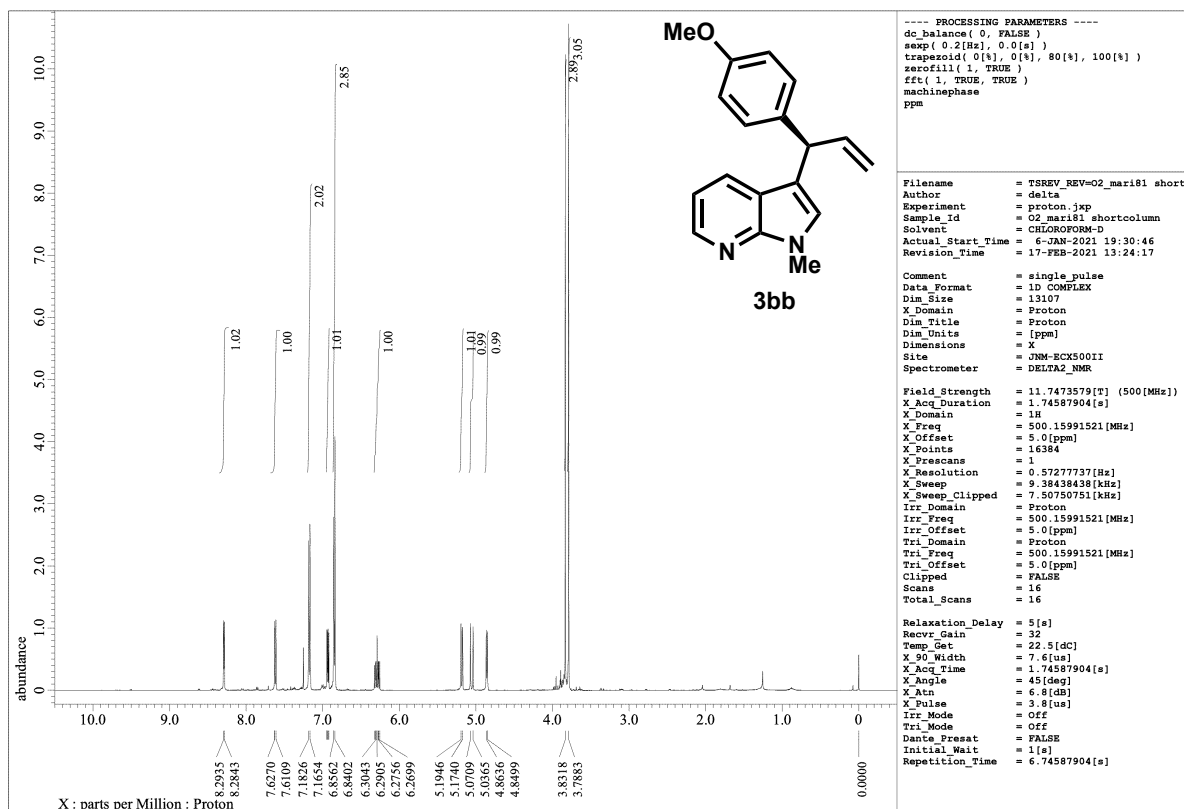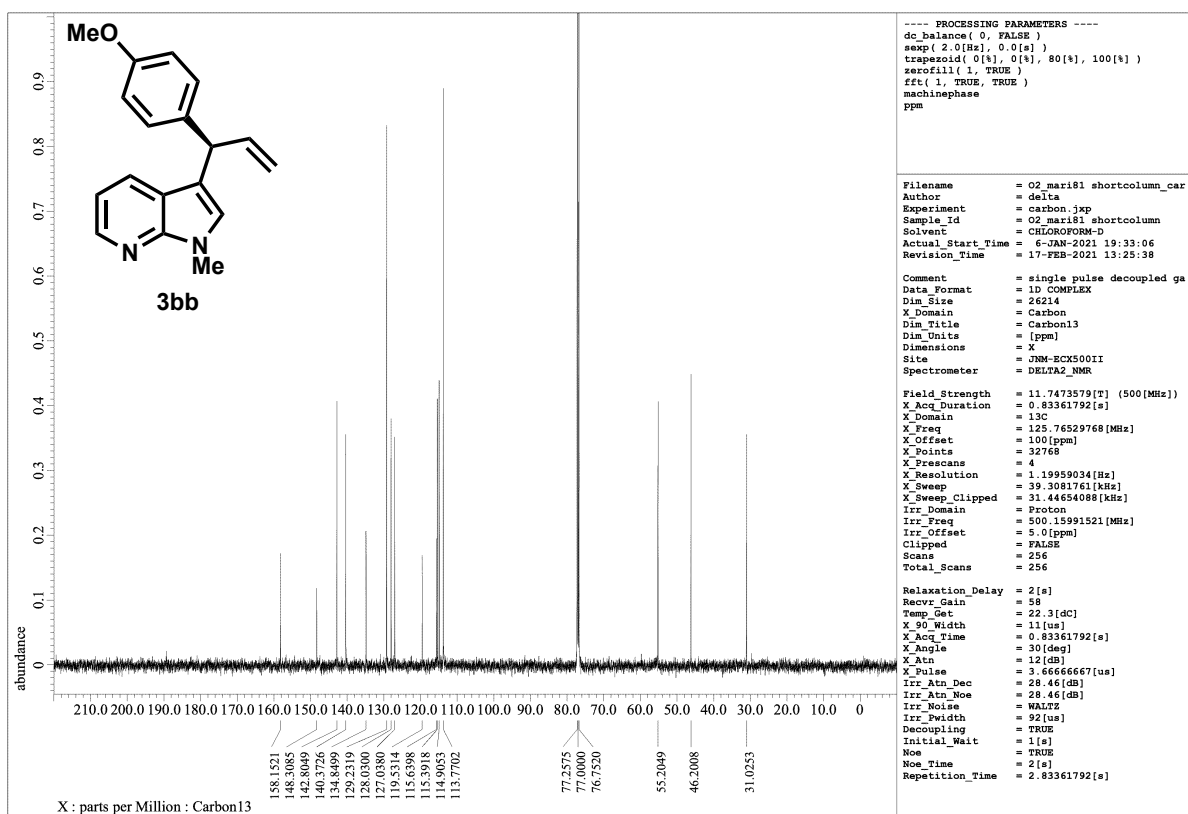

mV

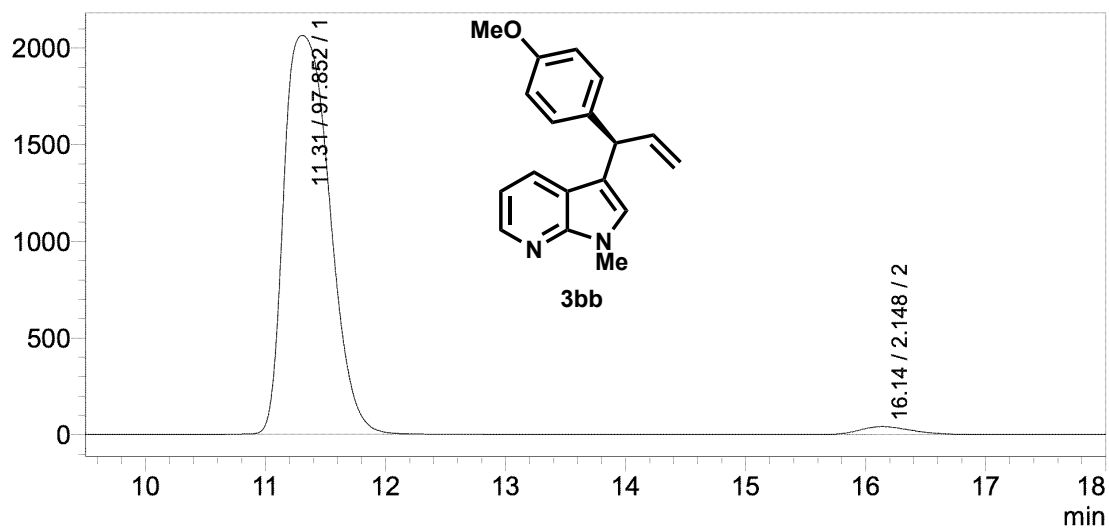

| Peak# | Ret. Time | Area%   |
|-------|-----------|---------|
| 1     | 11.31     | 97.852  |
| 2     | 16.14     | 2.148   |
| Total |           | 100.000 |

mV

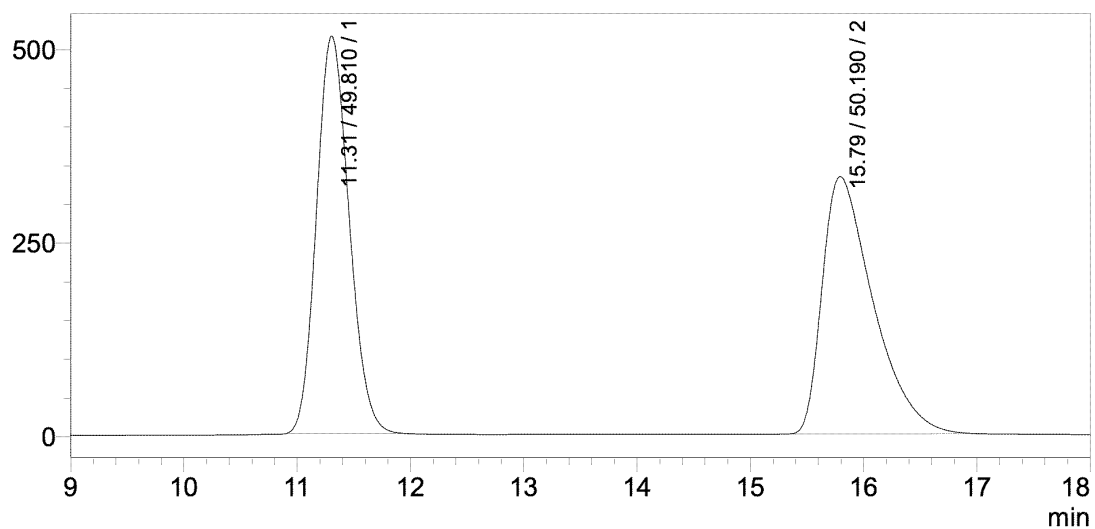

| Peak# | Ret. Time | Area%   |
|-------|-----------|---------|
| 1     | 11.31     | 49.810  |
| 2     | 15.79     | 50.190  |
| Total |           | 100.000 |

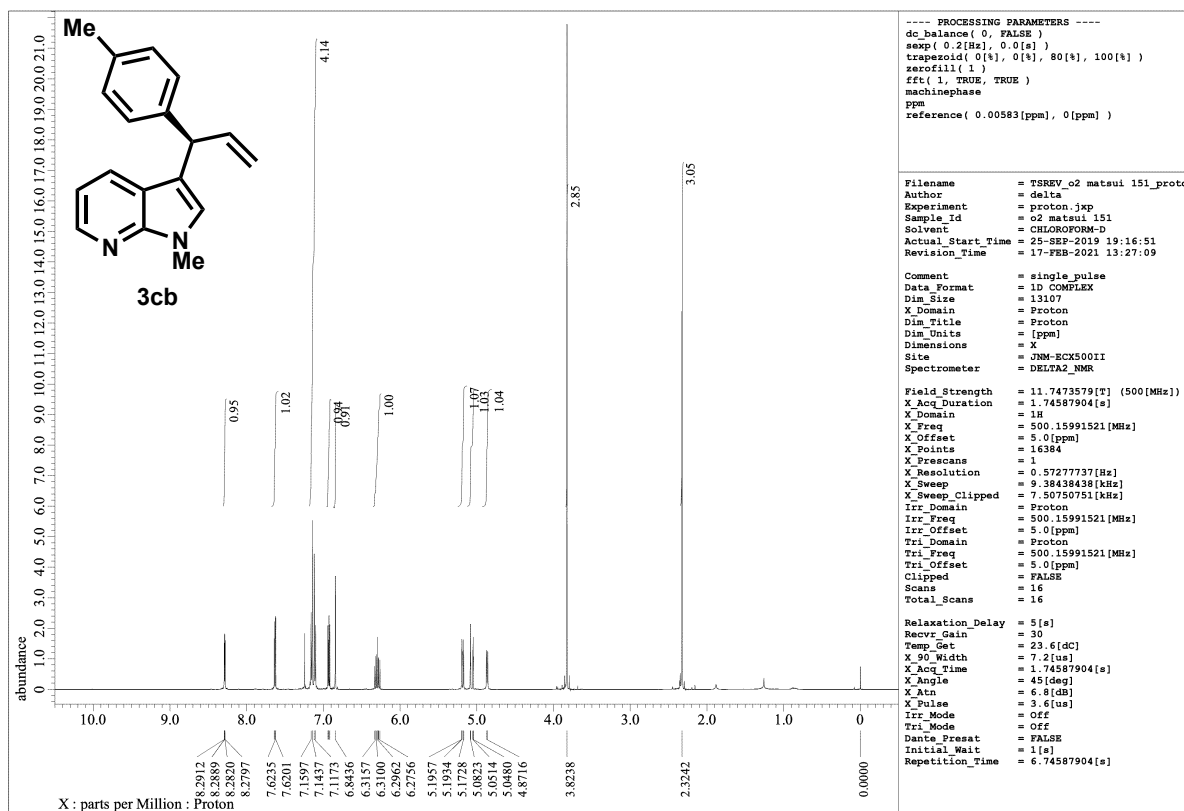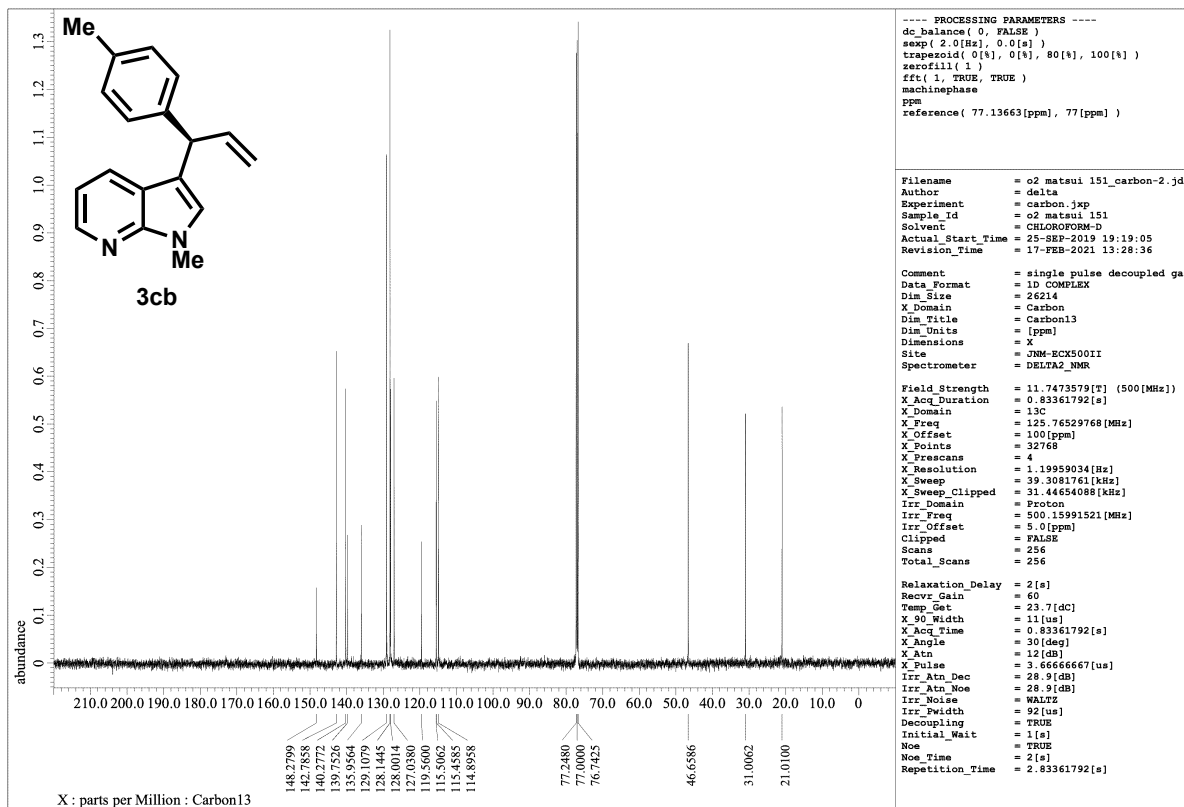

mV

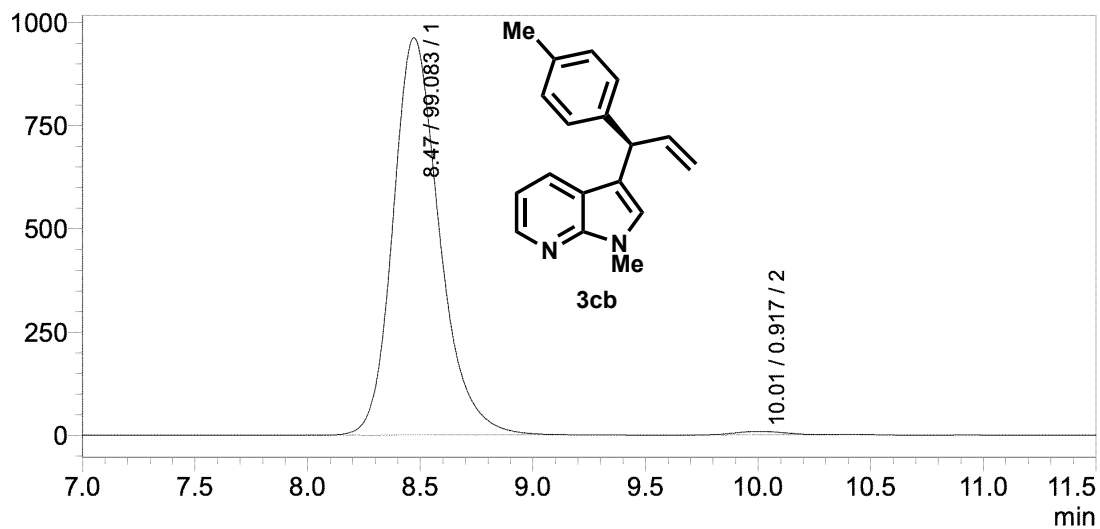

| Peak# | Ret. Time | Area%   |
|-------|-----------|---------|
| 1     | 8.47      | 99.083  |
| 2     | 10.01     | 0.917   |
| Total |           | 100.000 |

mV

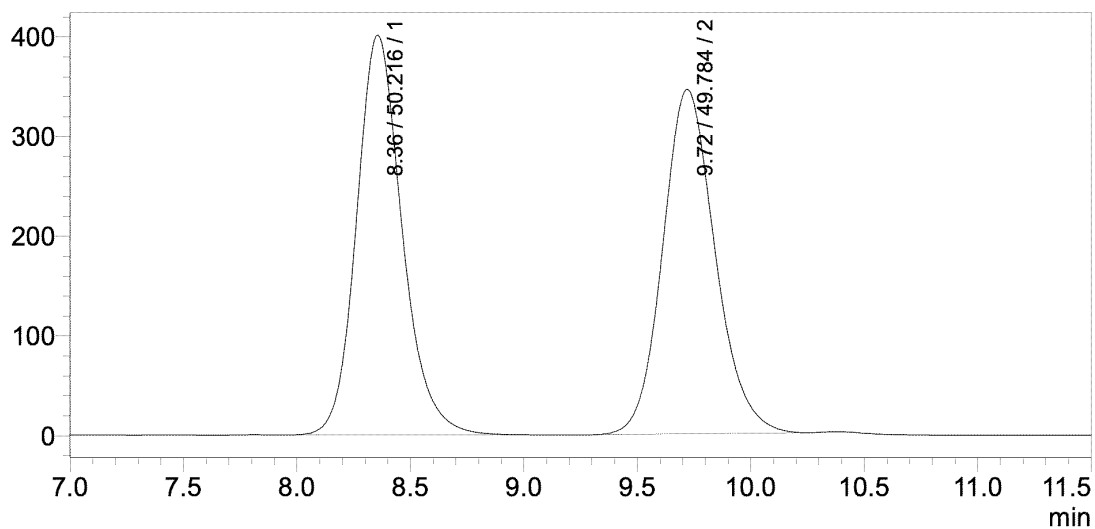

| Peak# | Ret. Time | Area%   |
|-------|-----------|---------|
| 1     | 8.36      | 50.216  |
| 2     | 9.72      | 49.784  |
| Total |           | 100.000 |

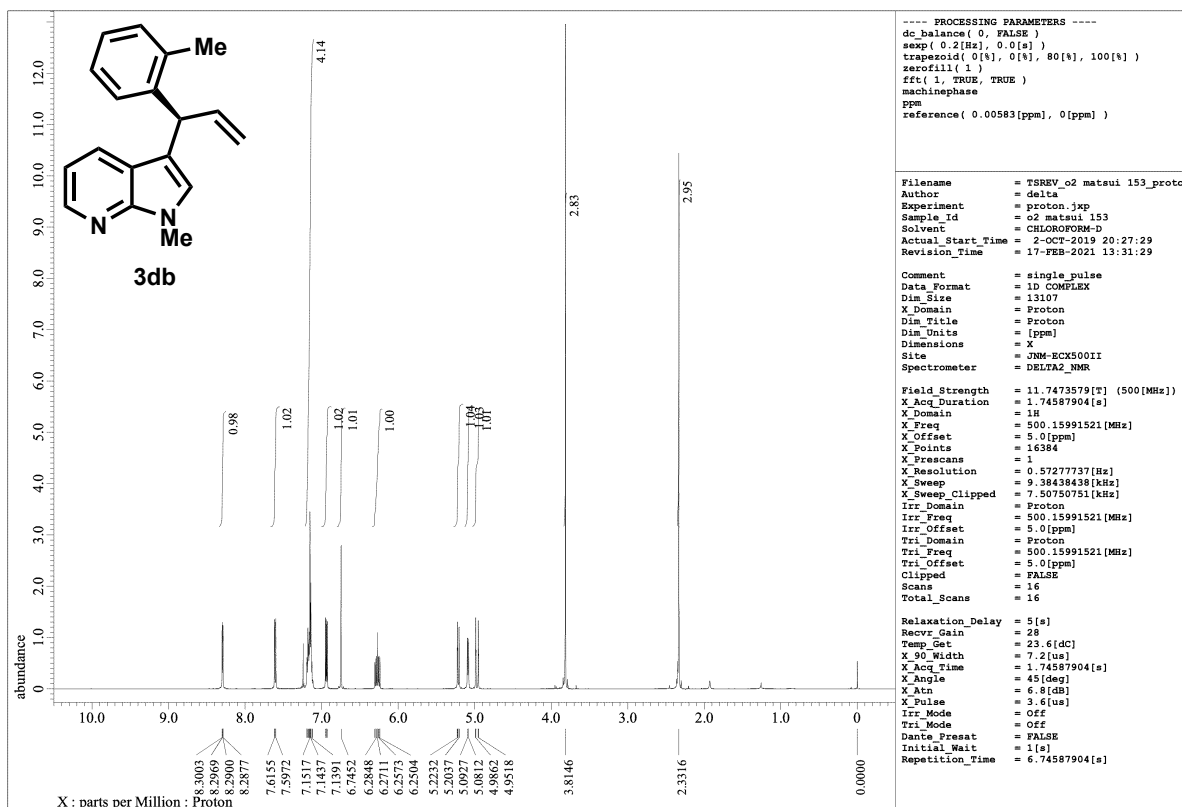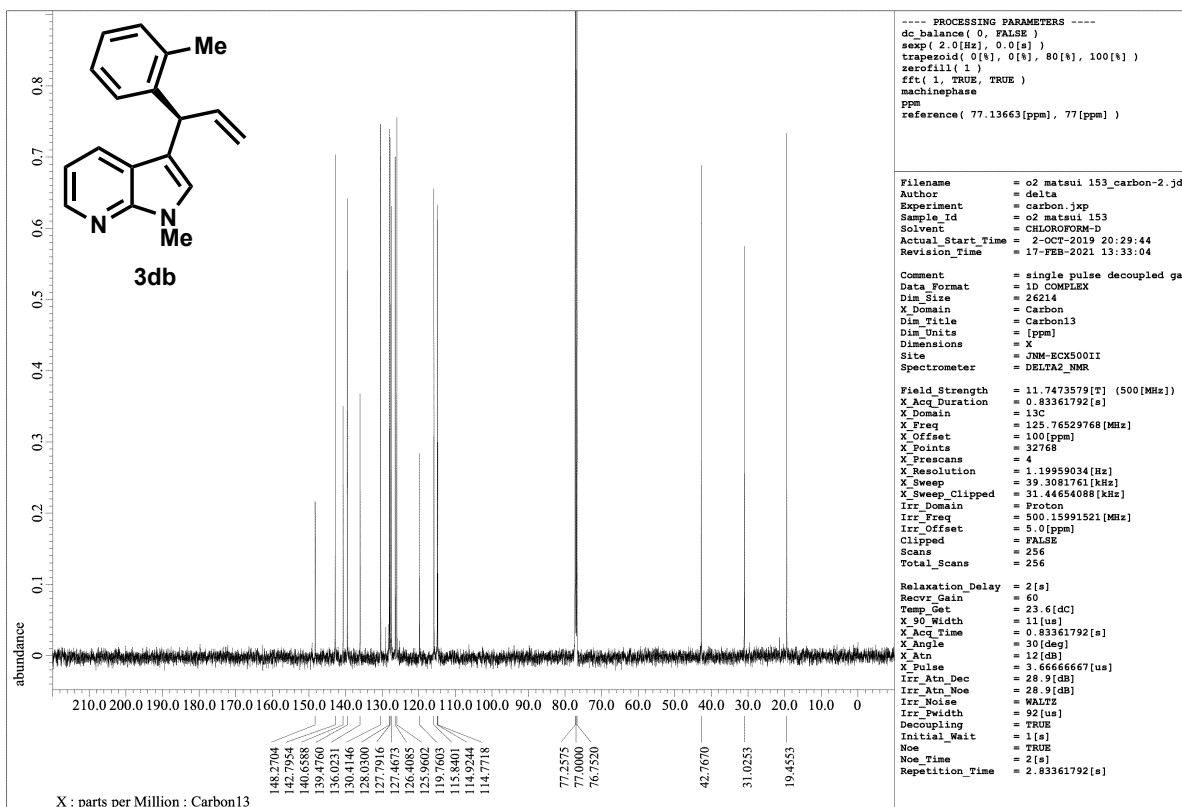

mV

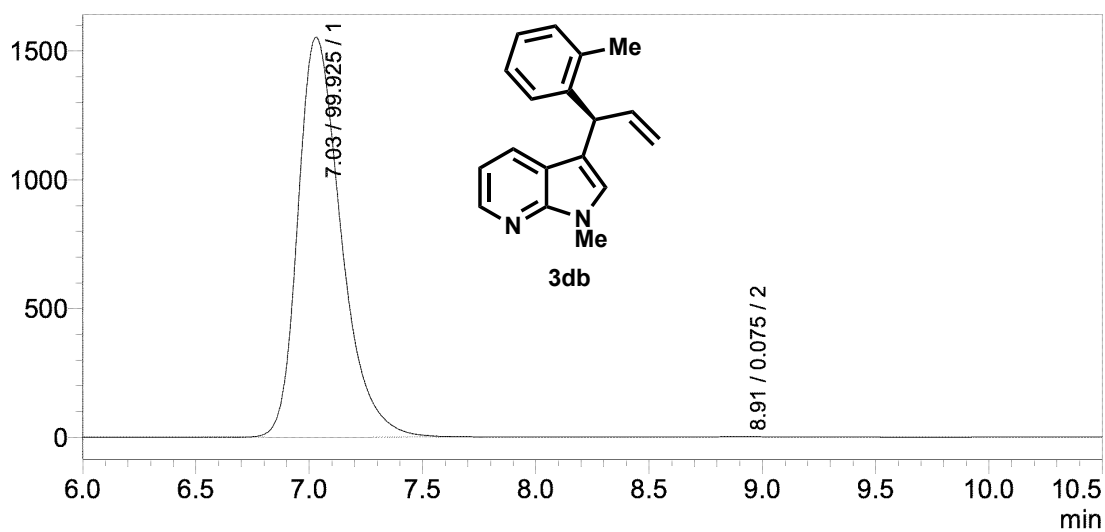

| Peak# | Ret. Time | Area%   |
|-------|-----------|---------|
| 1     | 7.03      | 99.925  |
| 2     | 8.91      | 0.075   |
| Total |           | 100.000 |

mV

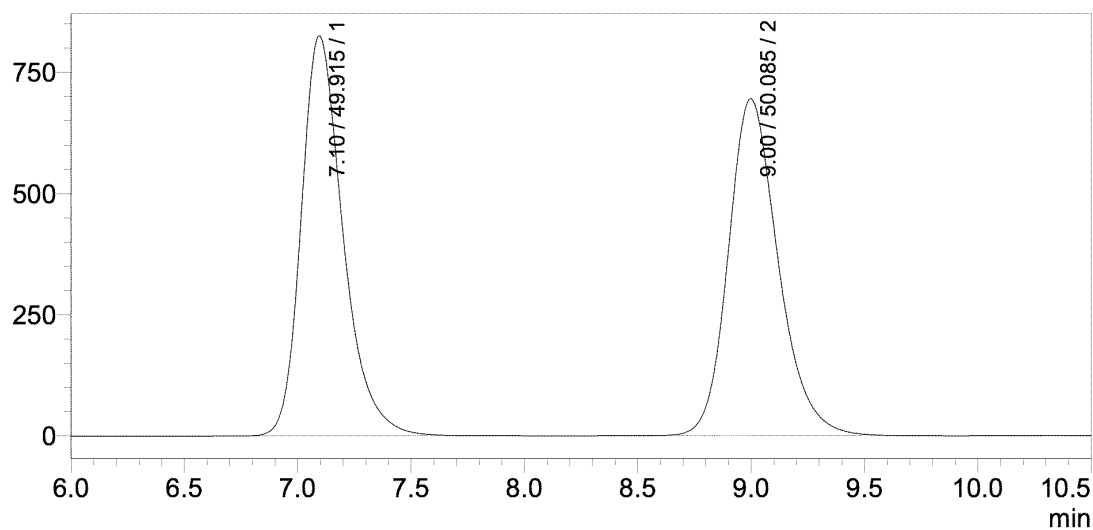

| Peak# | Ret. Time | Area%   |
|-------|-----------|---------|
| 1     | 7.10      | 49.915  |
| 2     | 9.00      | 50.085  |
| Total |           | 100.000 |

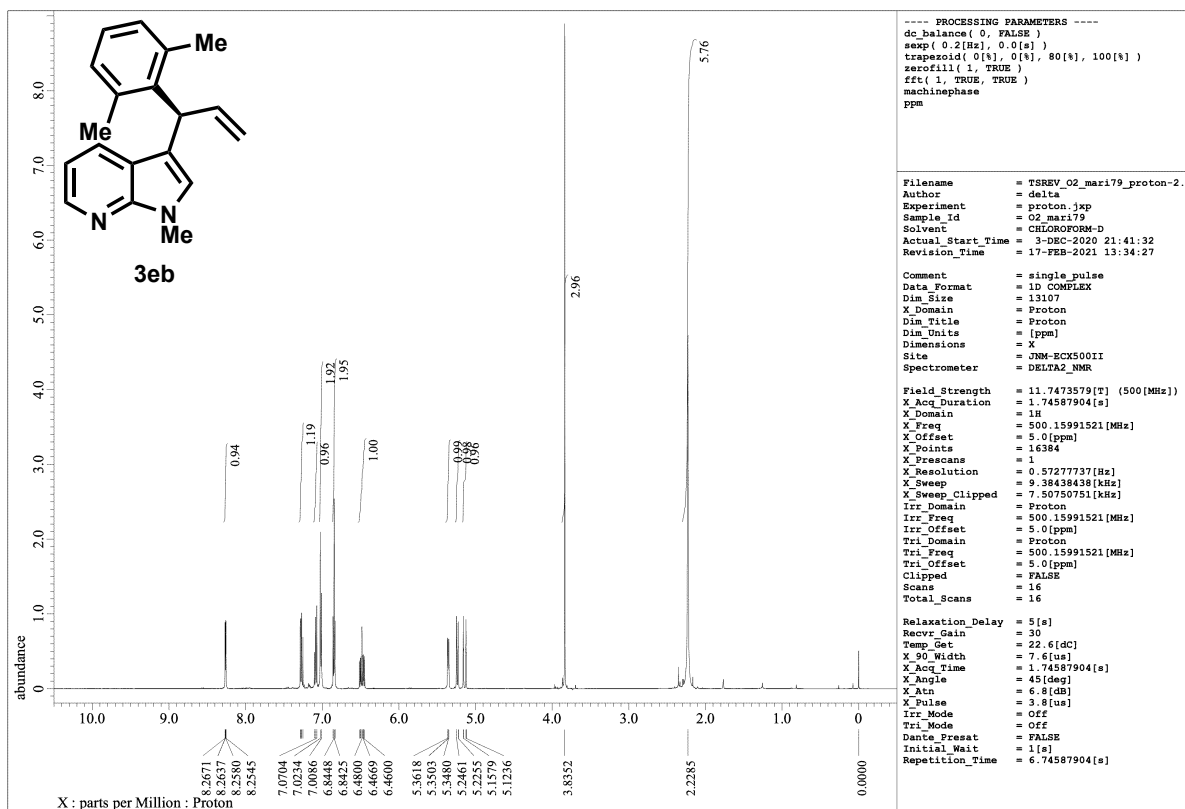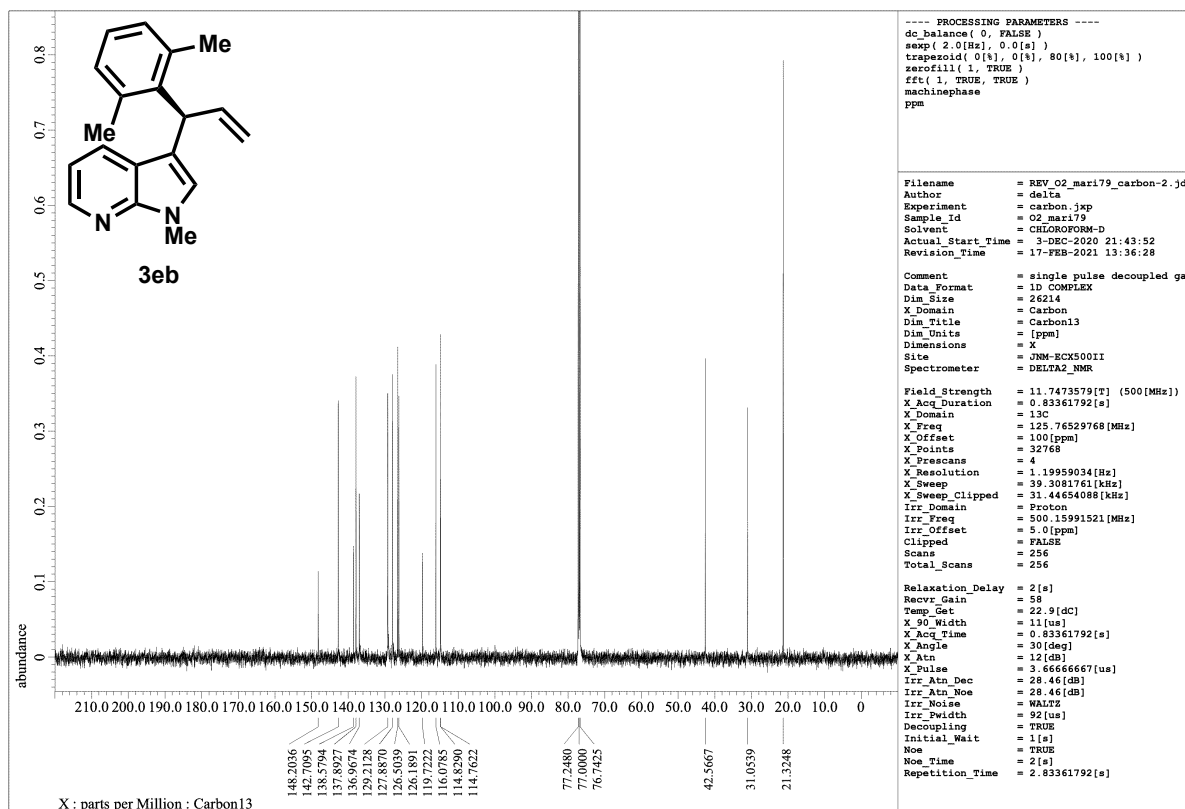

mV

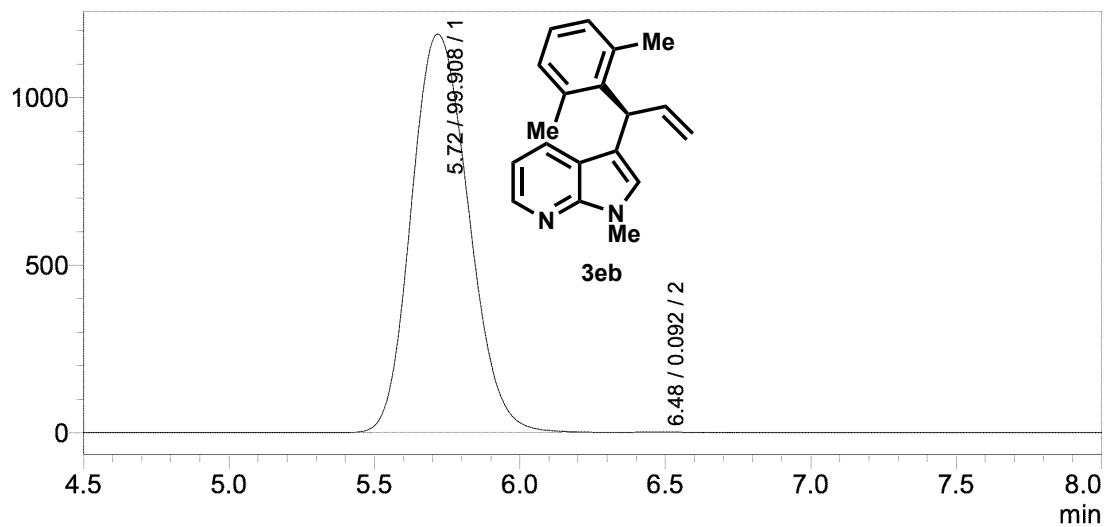

| Peak# | Ret. Time | Area%   |
|-------|-----------|---------|
| 1     | 5.72      | 99.908  |
| 2     | 6.48      | 0.092   |
| Total |           | 100.000 |

mV

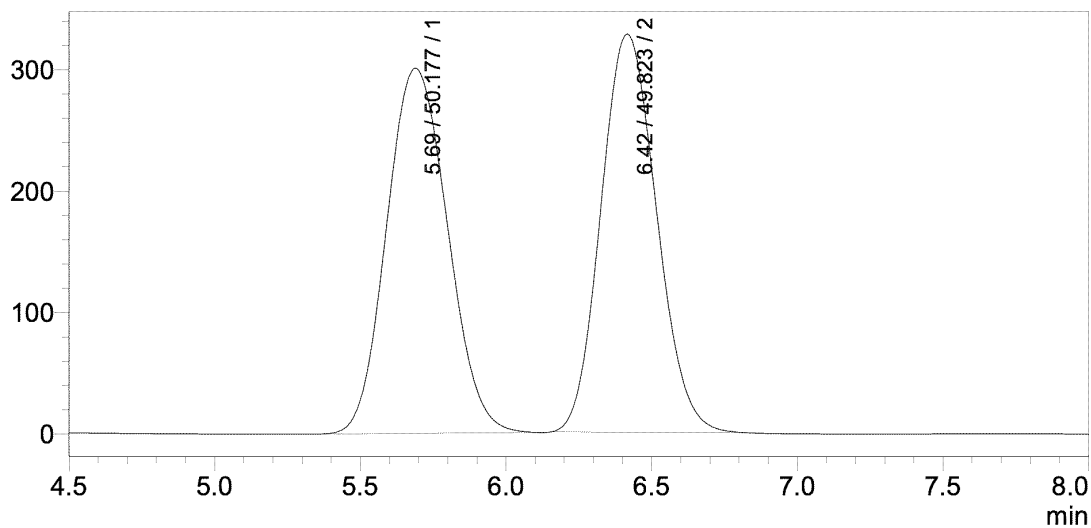

| Peak# | Ret. Time | Area%   |
|-------|-----------|---------|
| 1     | 5.69      | 50.177  |
| 2     | 6.42      | 49.823  |
| Total |           | 100.000 |

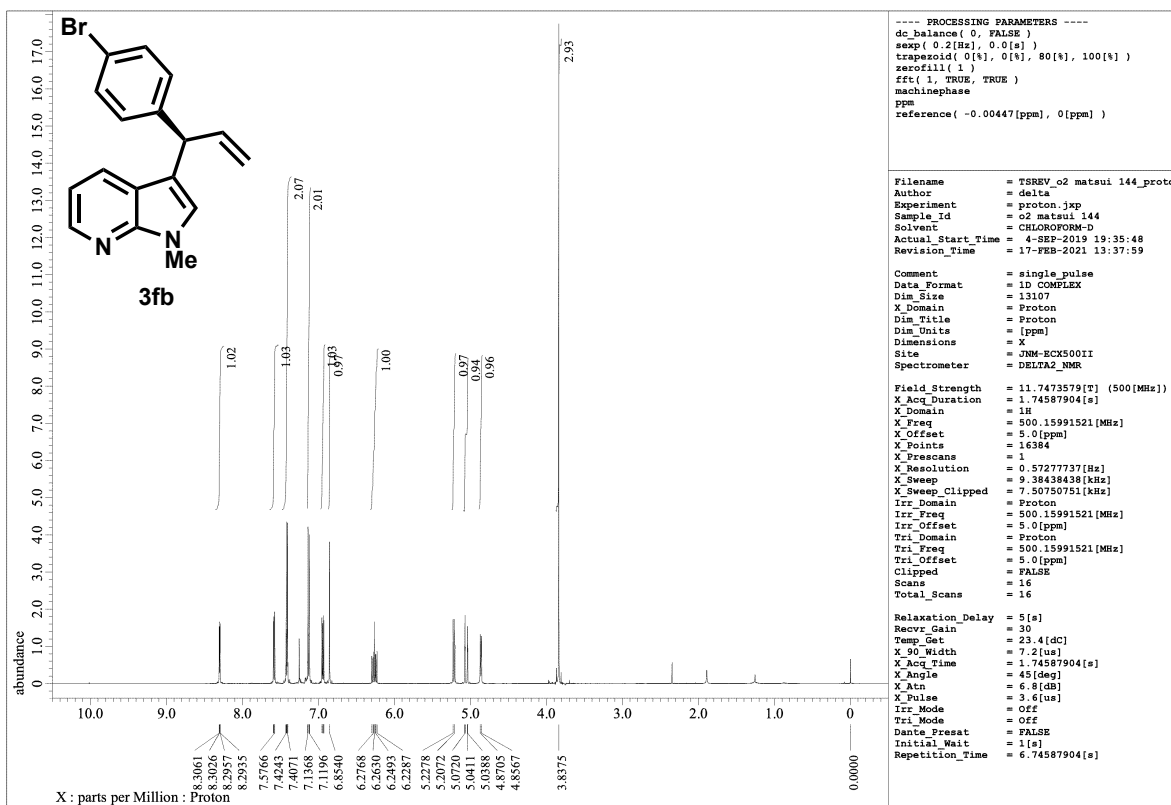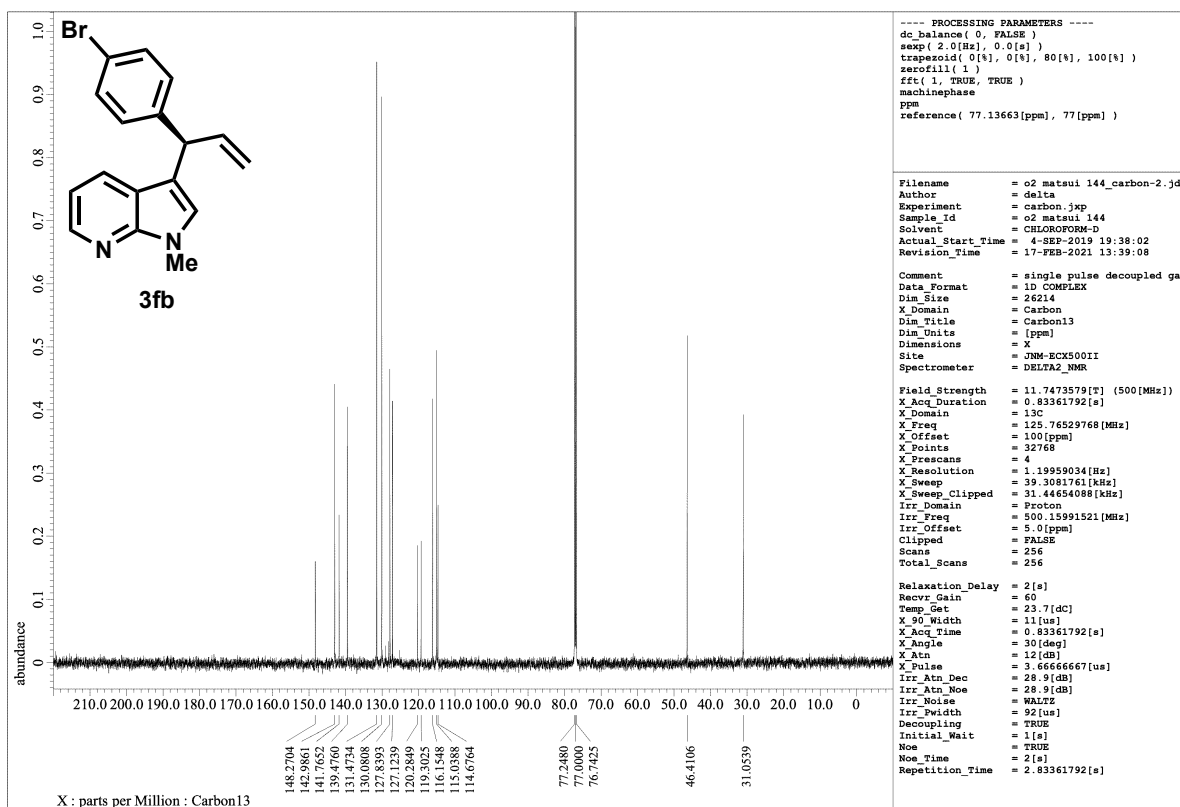

mV

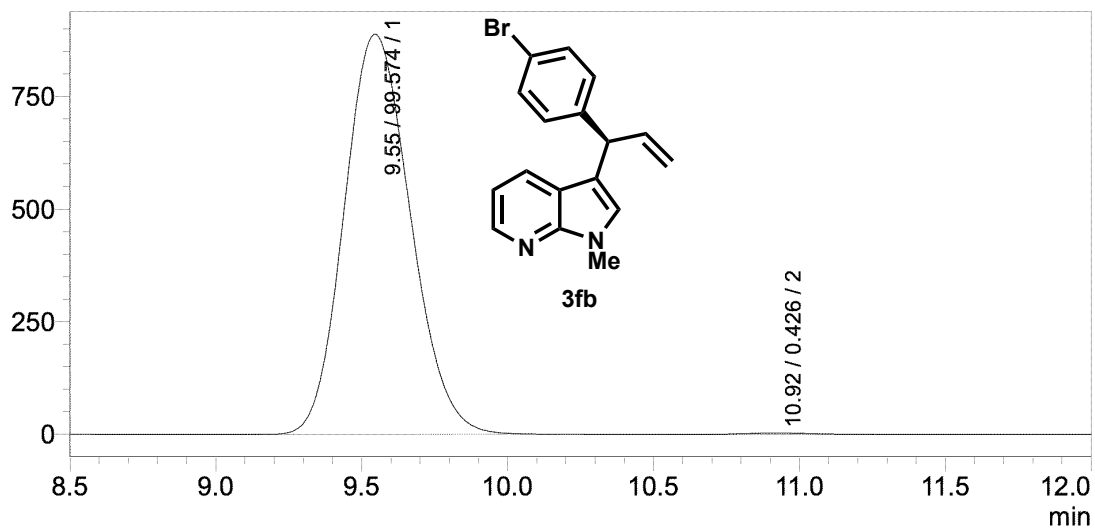

| Peak# | Ret. Time | Area%   |
|-------|-----------|---------|
| 1     | 9.55      | 99.574  |
| 2     | 10.92     | 0.426   |
| Total |           | 100.000 |

mV

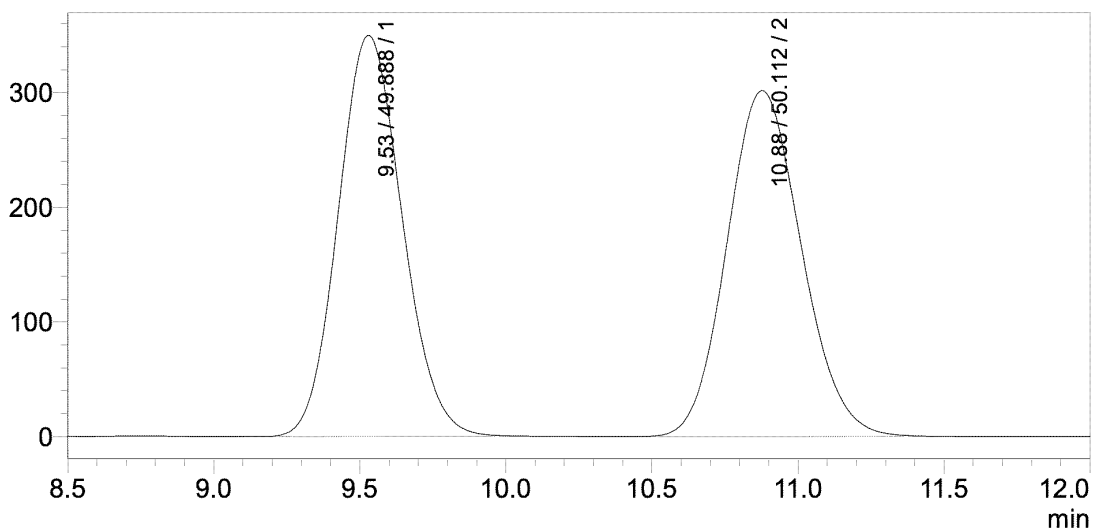

| Peak# | Ret. Time | Area%   |
|-------|-----------|---------|
| 1     | 9.53      | 49.888  |
| 2     | 10.88     | 50.112  |
| Total |           | 100.000 |

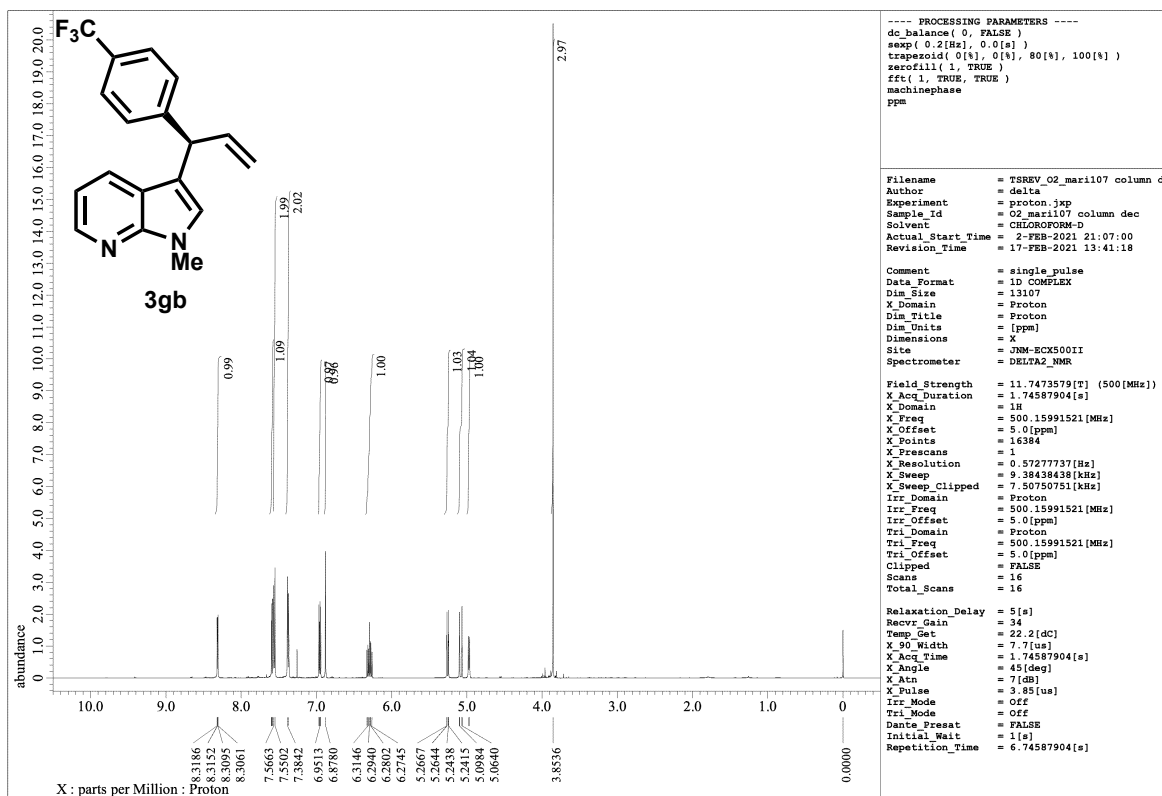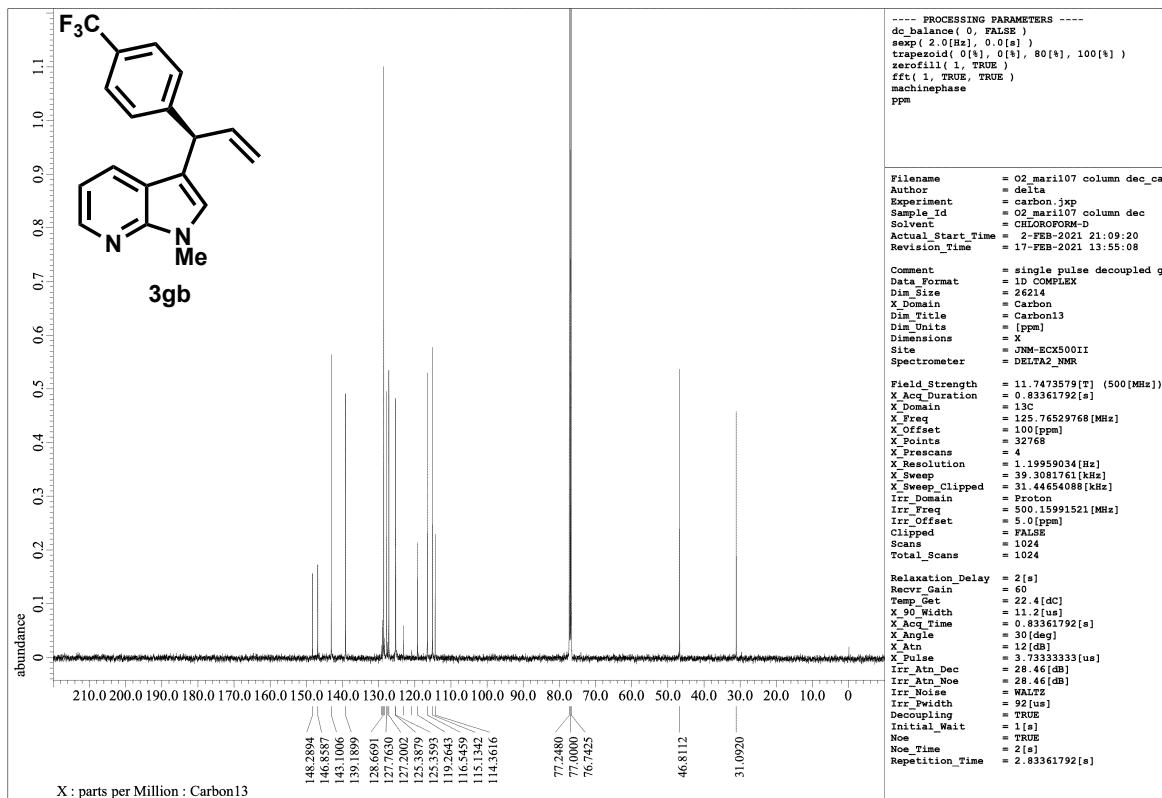

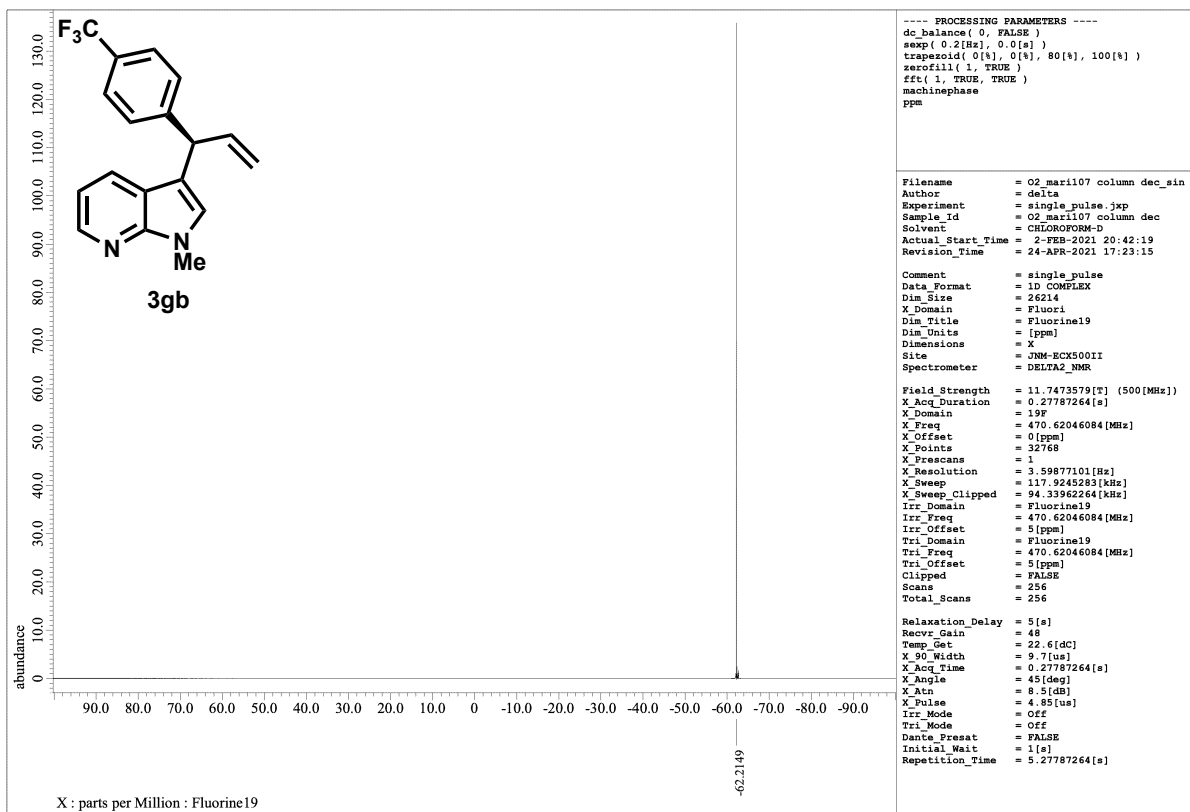

mV

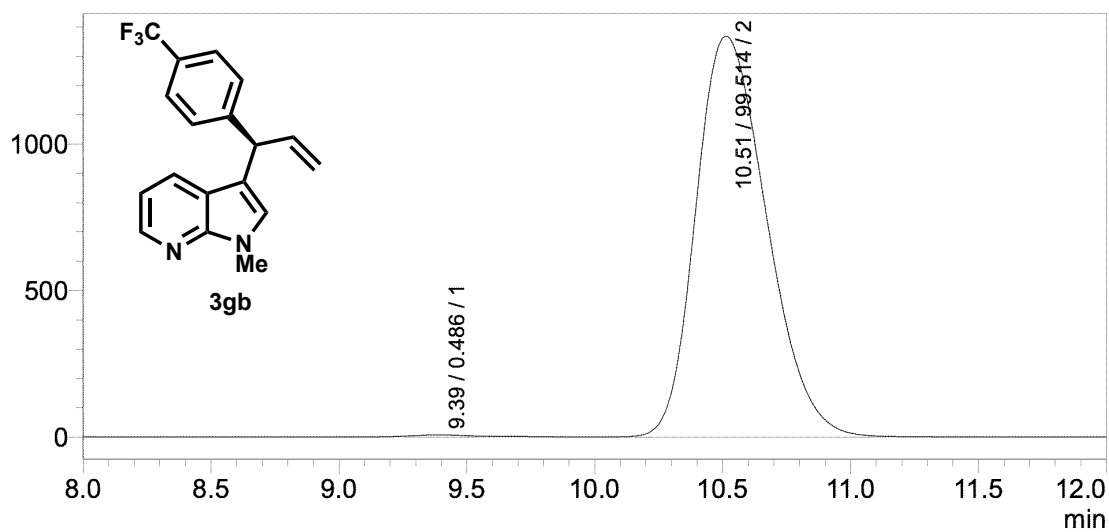

| Peak# | Ret. Time | Area%   |
|-------|-----------|---------|
| 1     | 9.39      | 0.486   |
| 2     | 10.51     | 99.514  |
| Total |           | 100.000 |

mV

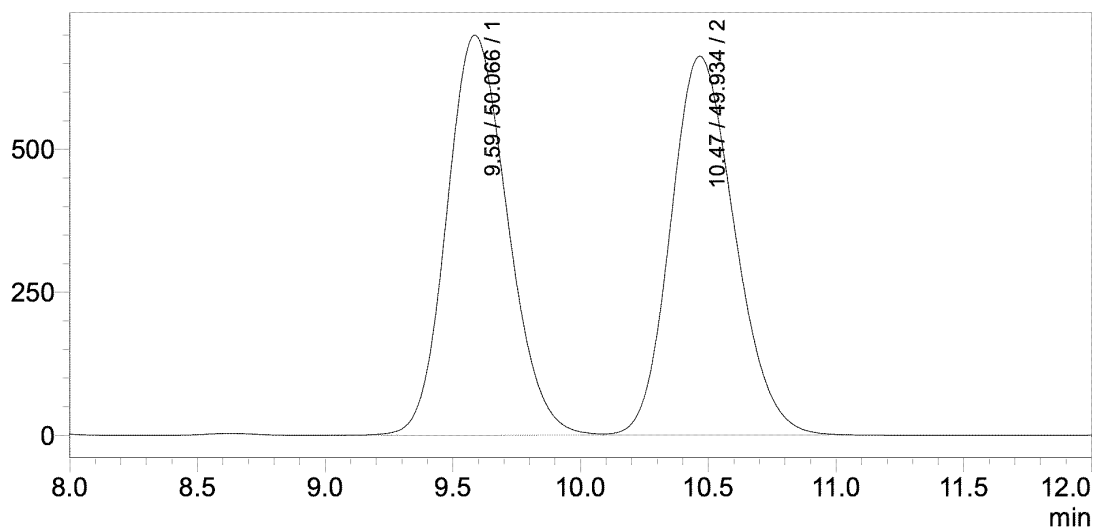

| Peak# | Ret. Time | Area%   |
|-------|-----------|---------|
| 1     | 9.59      | 50.066  |
| 2     | 10.47     | 49.934  |
| Total |           | 100.000 |

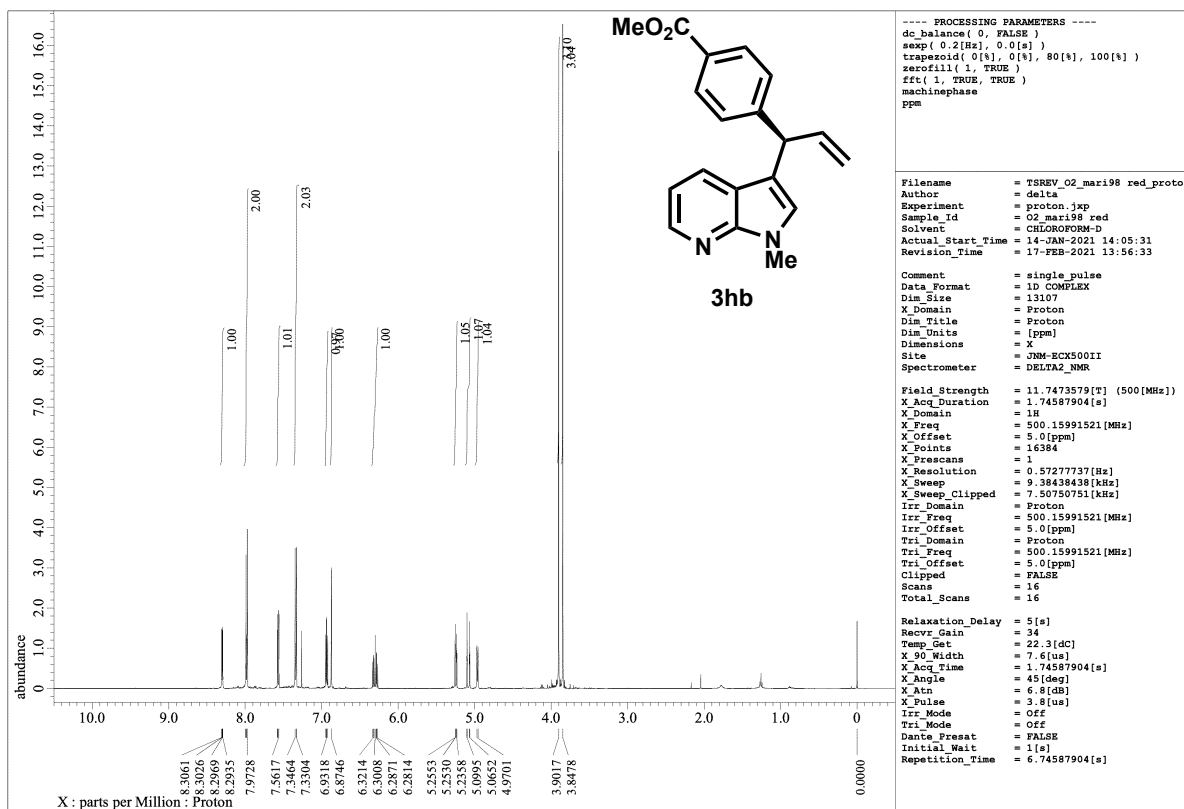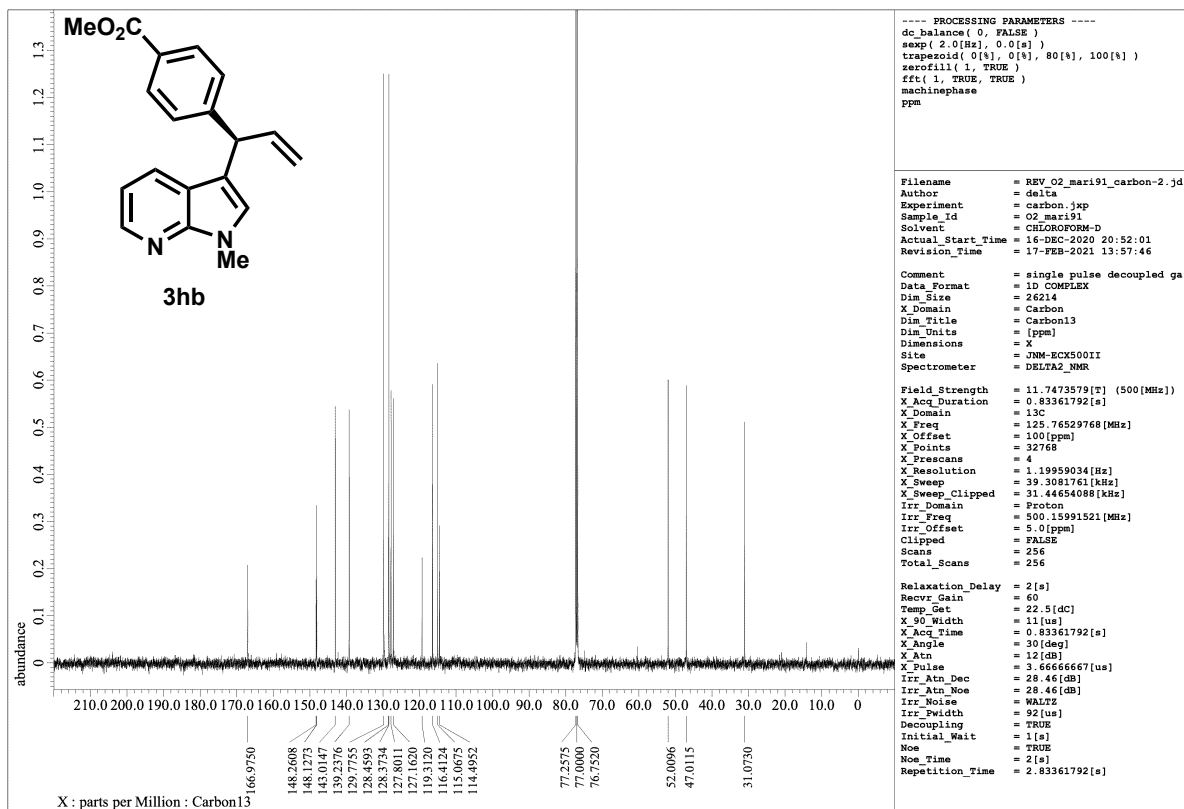

mV

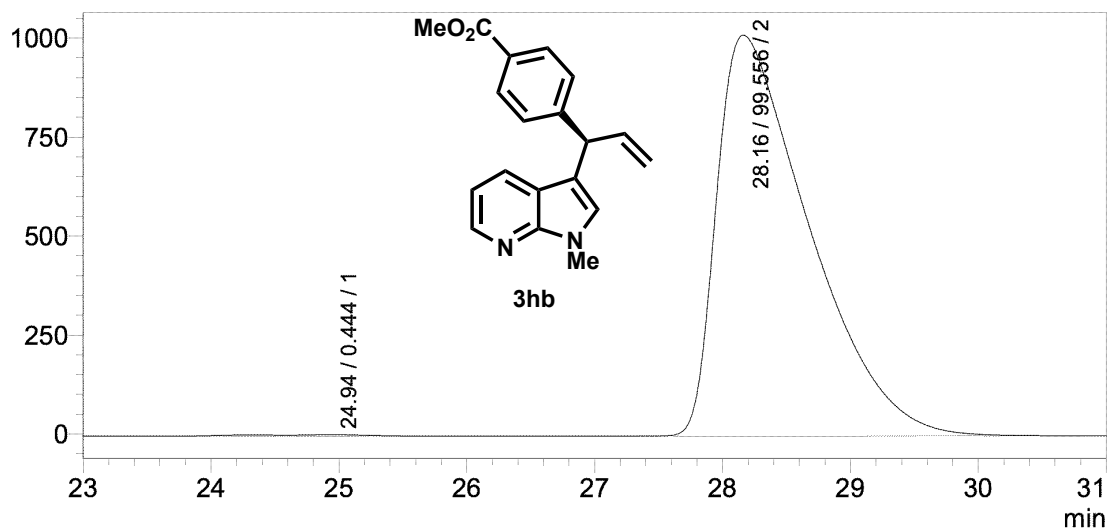

| Peak# | Ret. Time | Area%   |
|-------|-----------|---------|
| 1     | 24.94     | 0.444   |
| 2     | 28.16     | 99.556  |
| Total |           | 100.000 |

mV

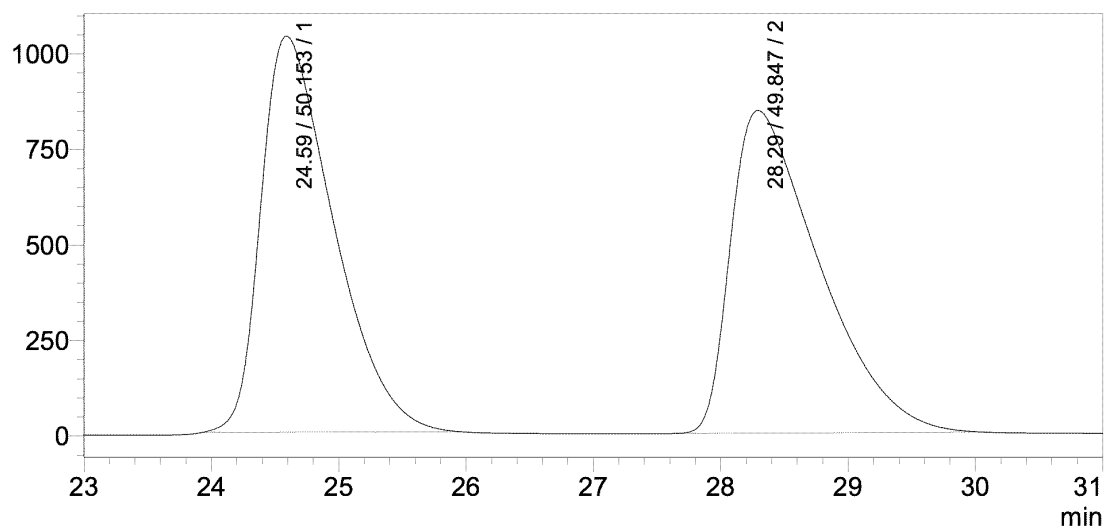

| Peak# | Ret. Time | Area%   |
|-------|-----------|---------|
| 1     | 24.59     | 50.153  |
| 2     | 28.29     | 49.847  |
| Total |           | 100.000 |

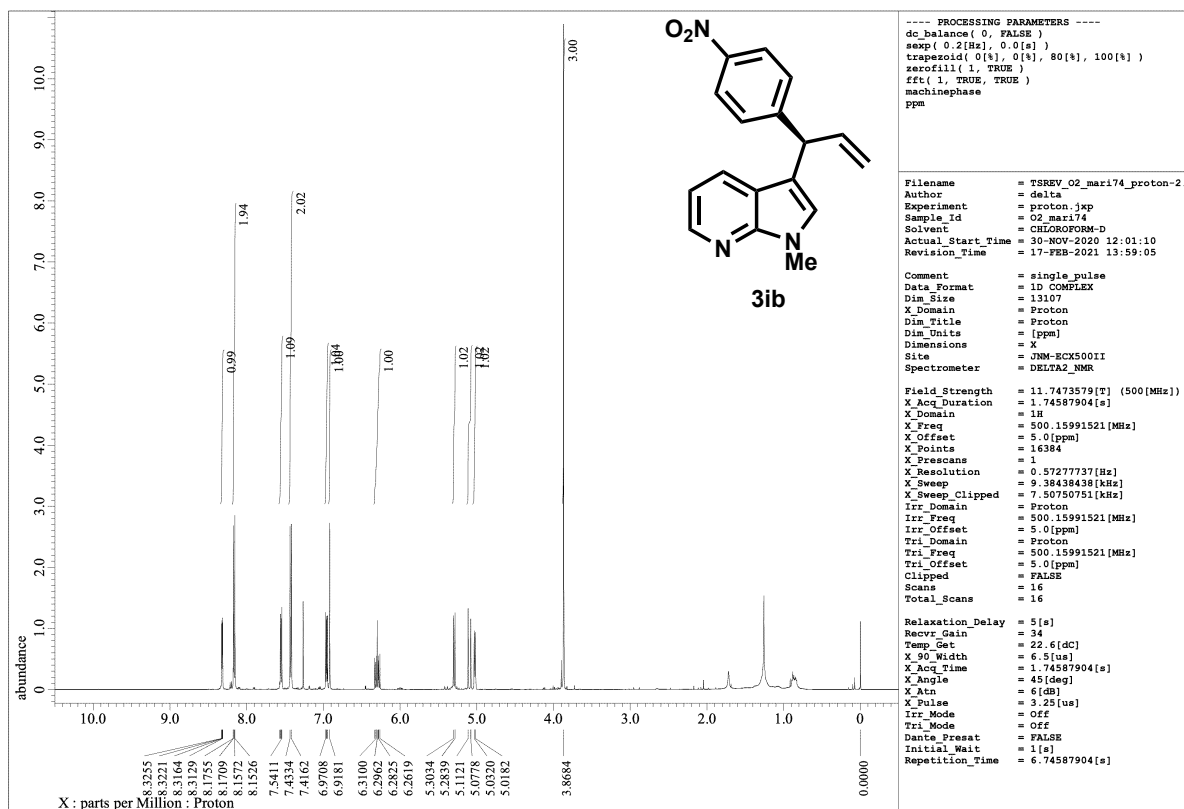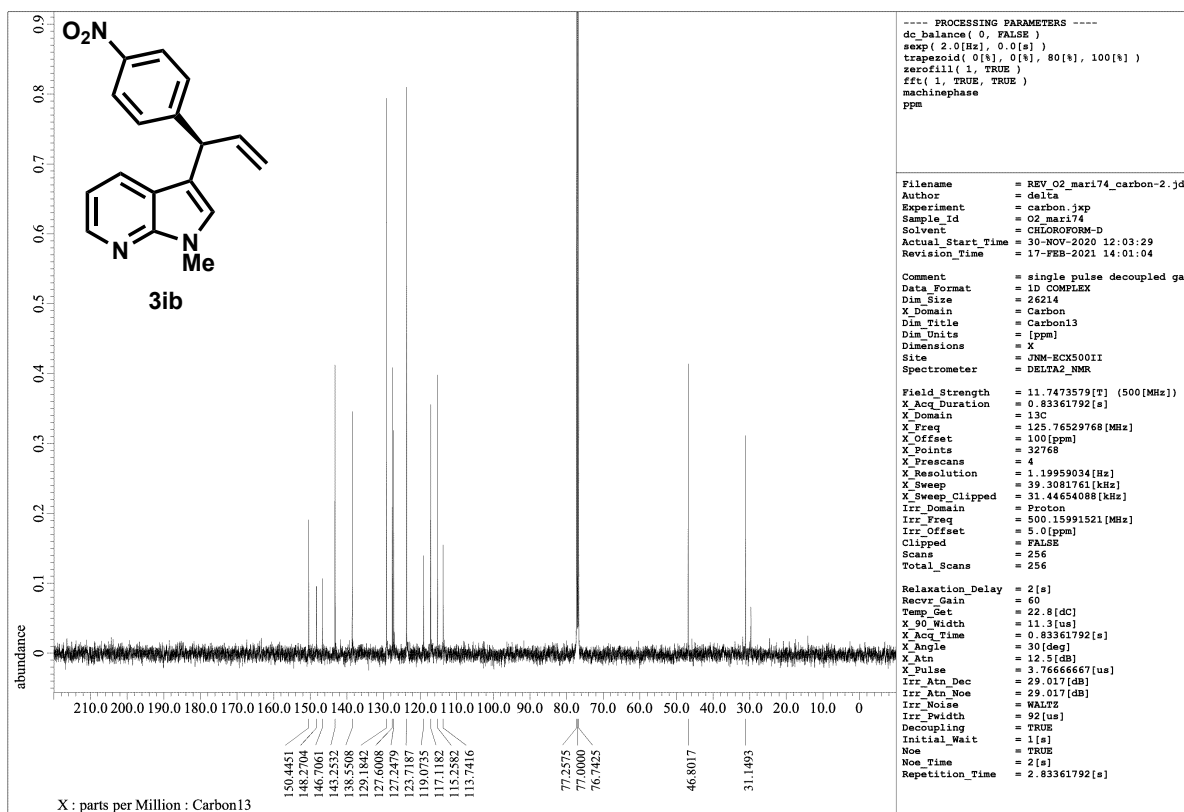

mV

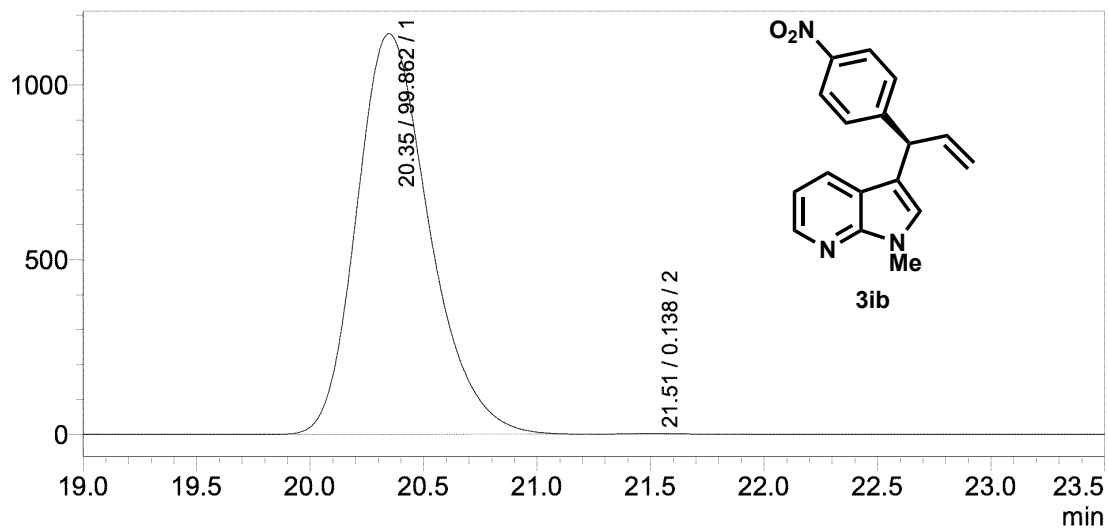

| Peak# | Ret. Time | Area%   |
|-------|-----------|---------|
| 1     | 20.35     | 99.862  |
| 2     | 21.51     | 0.138   |
| Total |           | 100.000 |

mV

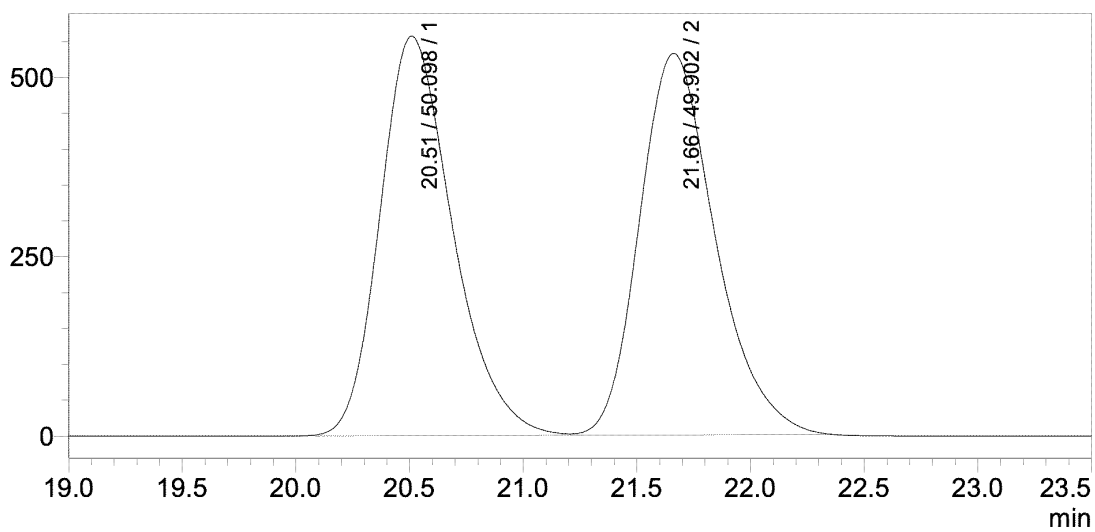

| Peak# | Ret. Time | Area%   |
|-------|-----------|---------|
| 1     | 20.51     | 50.098  |
| 2     | 21.66     | 49.902  |
| Total |           | 100.000 |

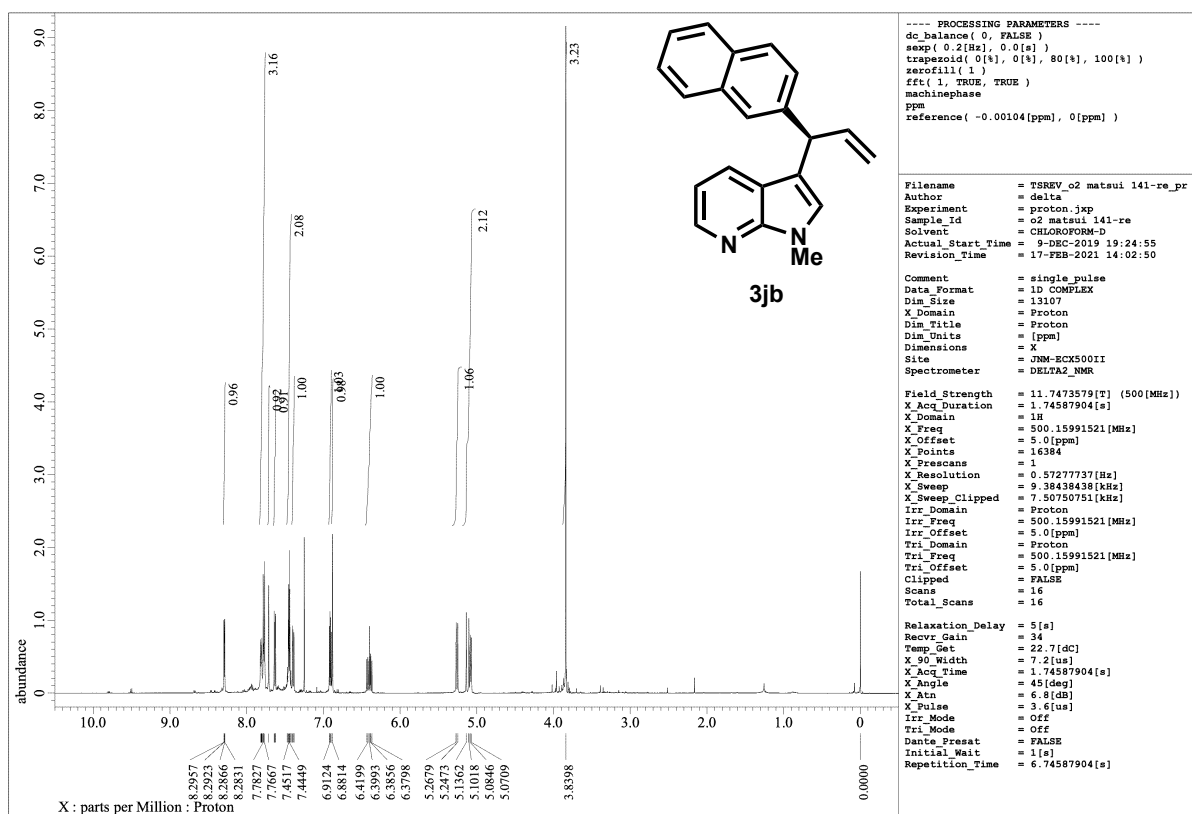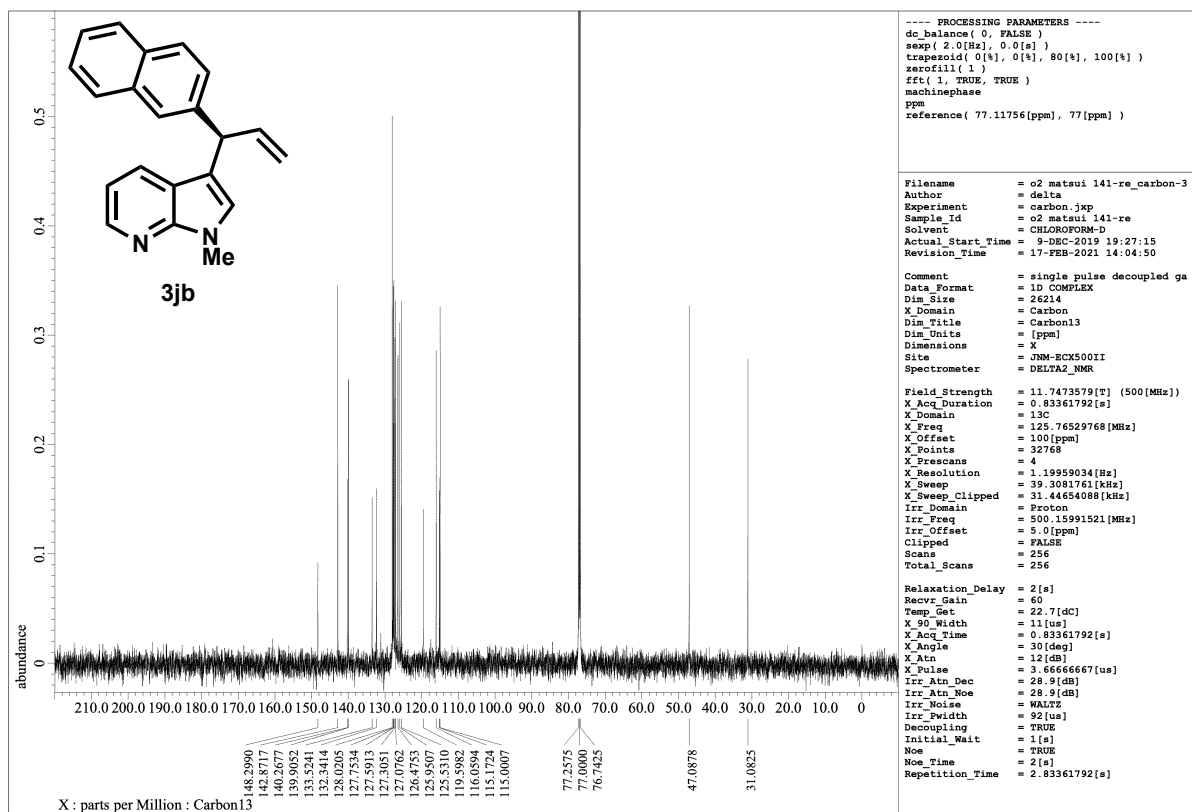

mV

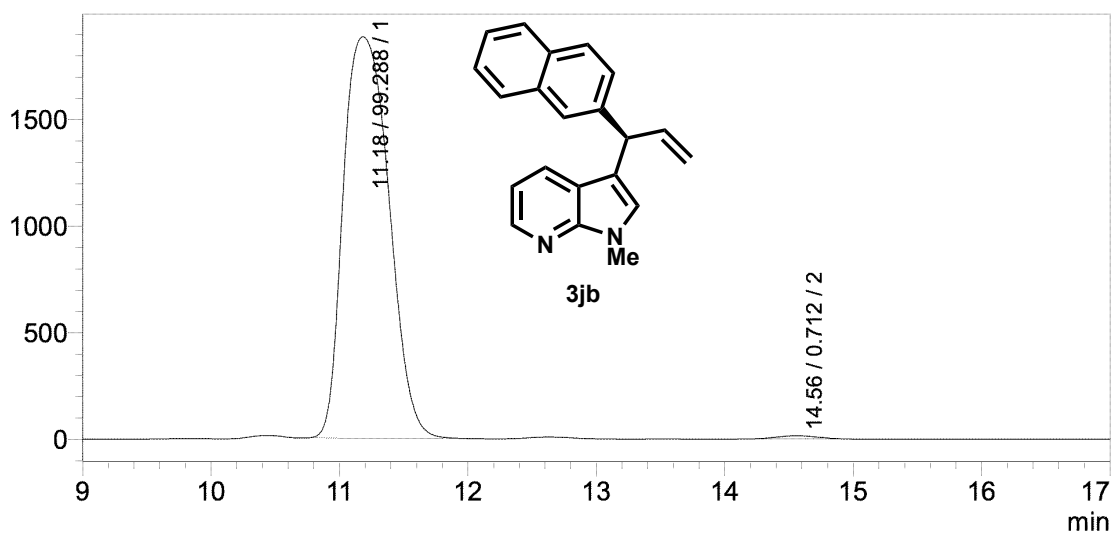

| Peak# | Ret. Time | Area%   |
|-------|-----------|---------|
| 1     | 11.18     | 99.288  |
| 2     | 14.56     | 0.712   |
| Total |           | 100.000 |

mV

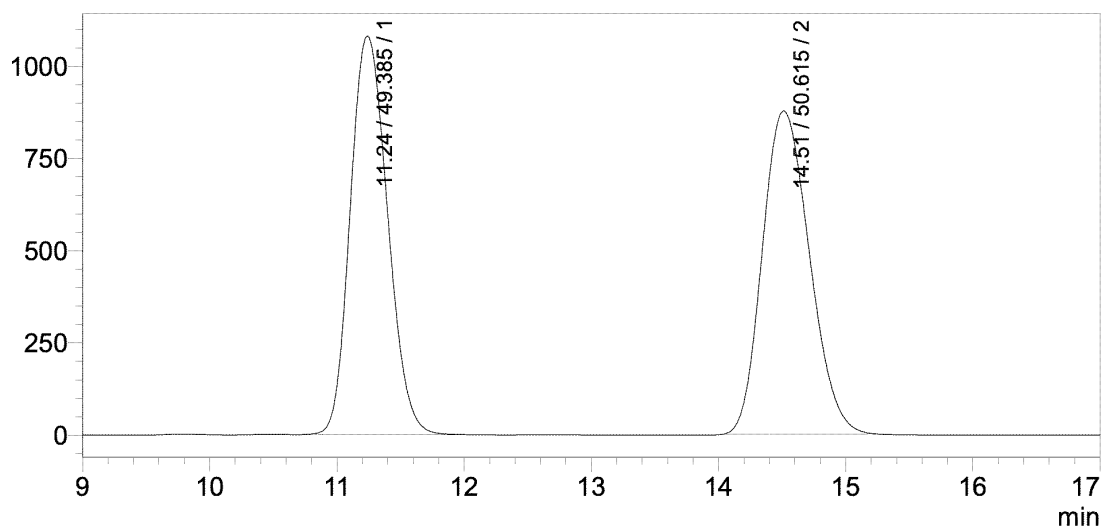

| Peak# | Ret. Time | Area%   |
|-------|-----------|---------|
| 1     | 11.24     | 49.385  |
| 2     | 14.51     | 50.615  |
| Total |           | 100.000 |

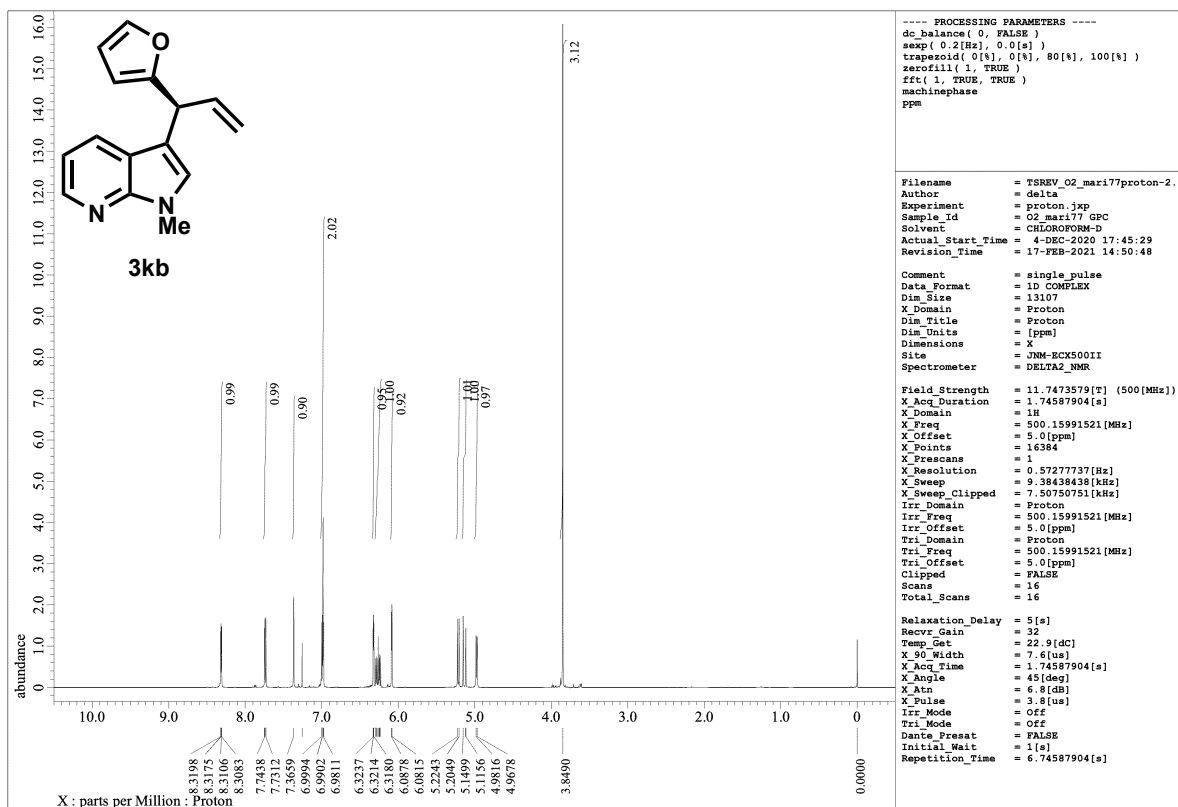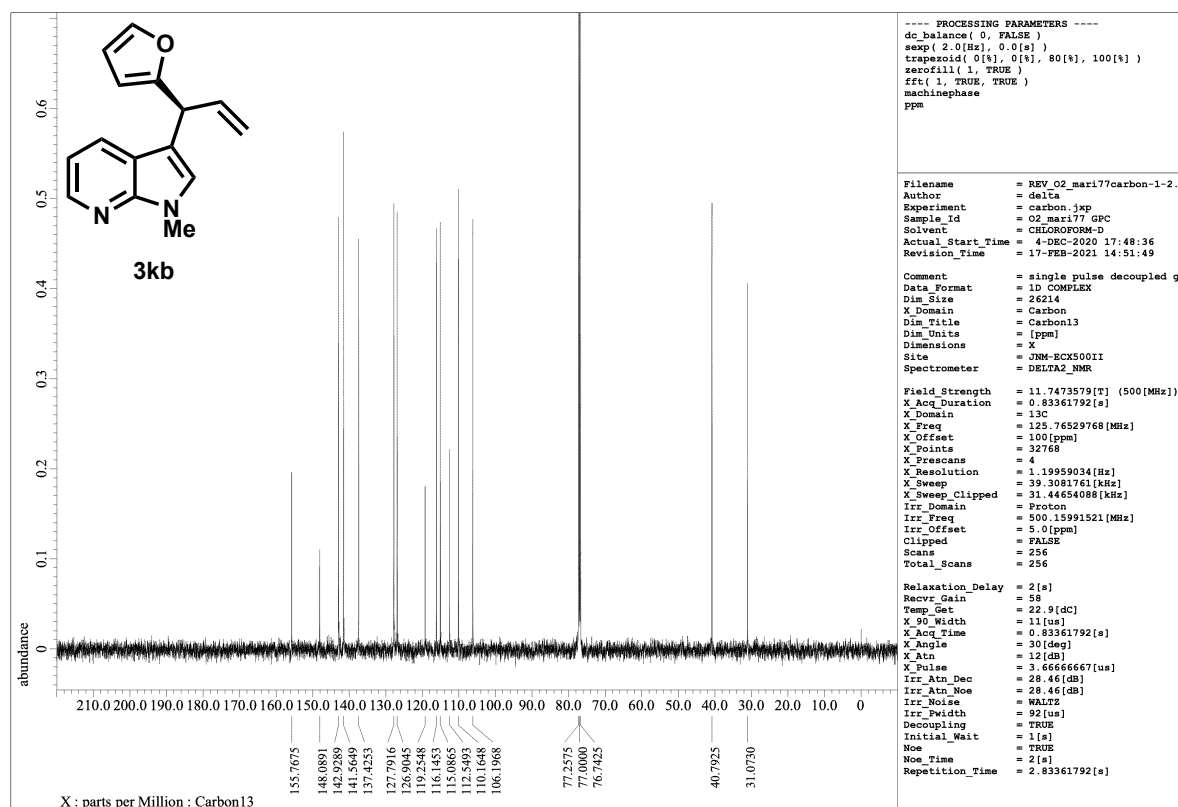

mV

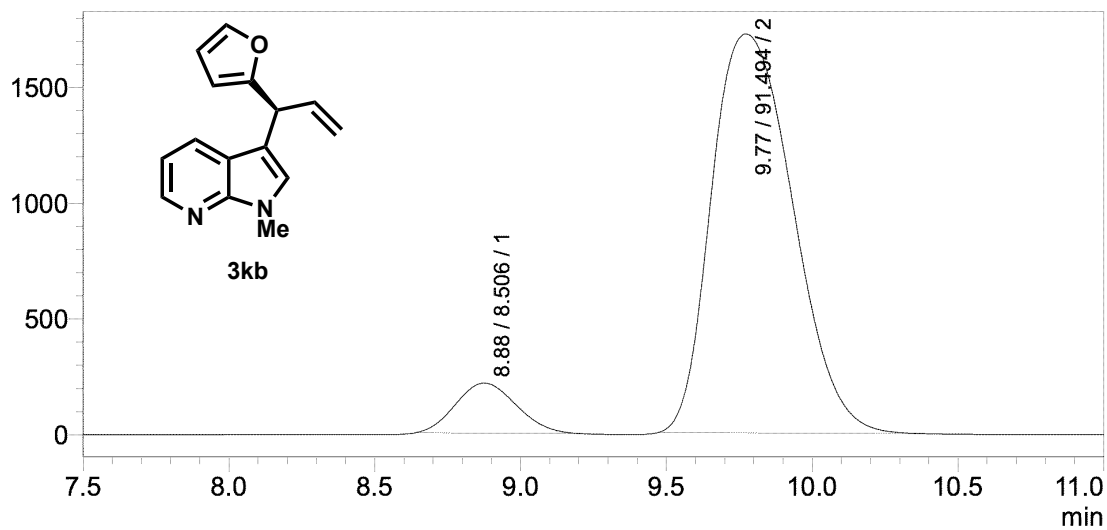

| Peak# | Ret. Time | Area%   |
|-------|-----------|---------|
| 1     | 8.88      | 8.506   |
| 2     | 9.77      | 91.494  |
| Total |           | 100.000 |

mV

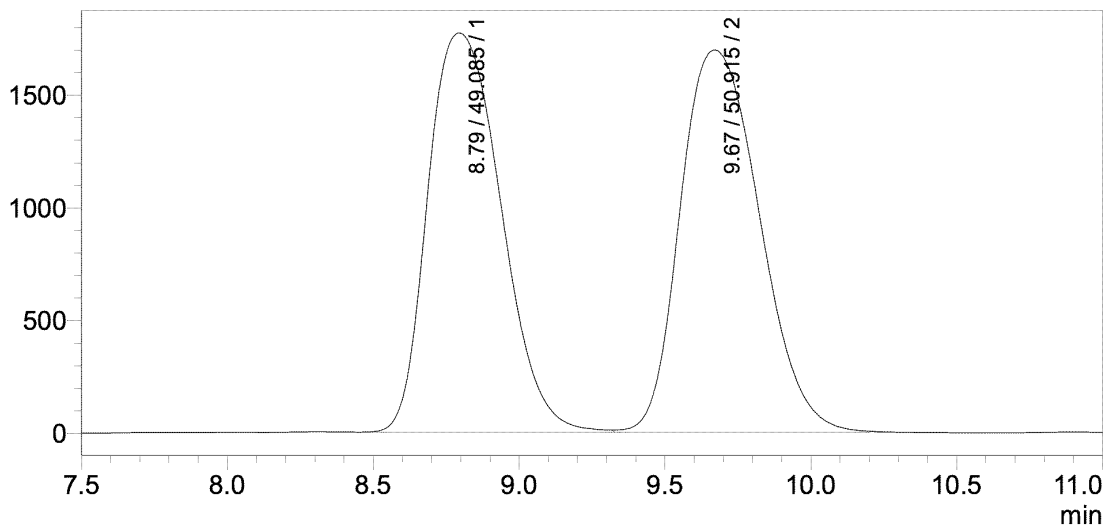

| Peak# | Ret. Time | Area%   |
|-------|-----------|---------|
| 1     | 8.79      | 49.085  |
| 2     | 9.67      | 50.915  |
| Total |           | 100.000 |

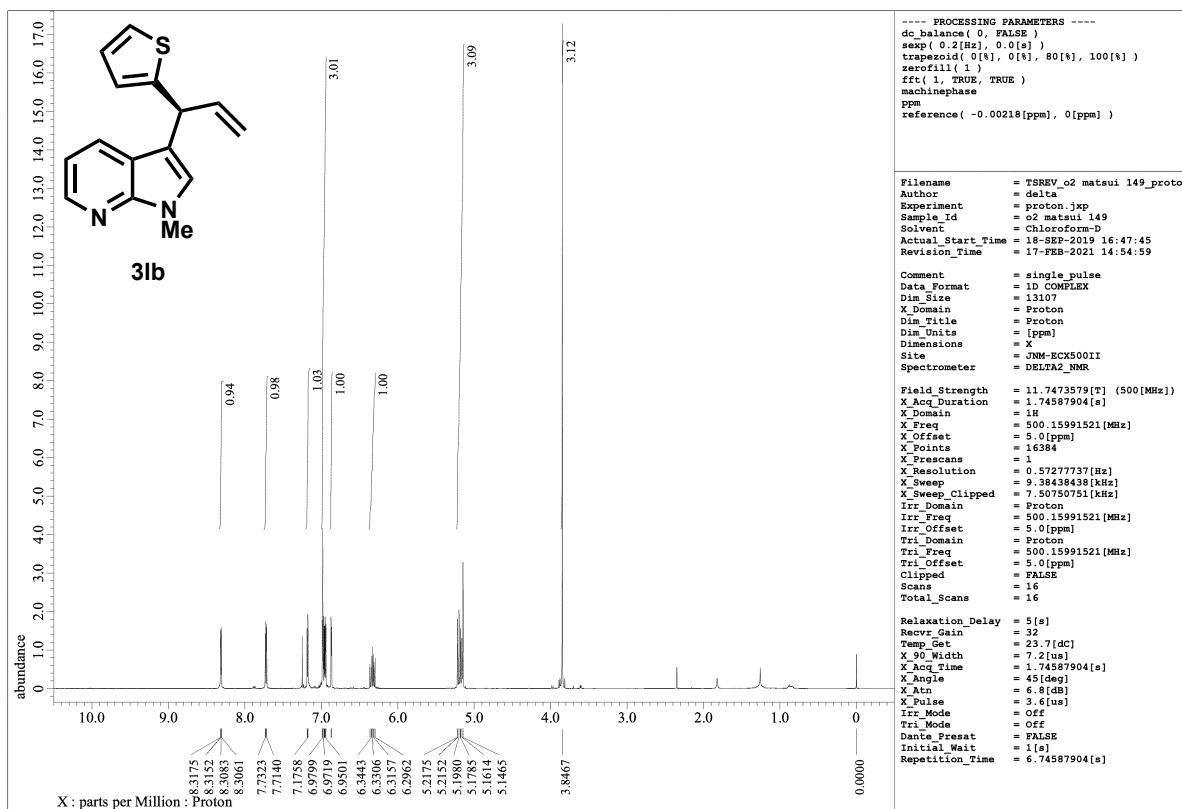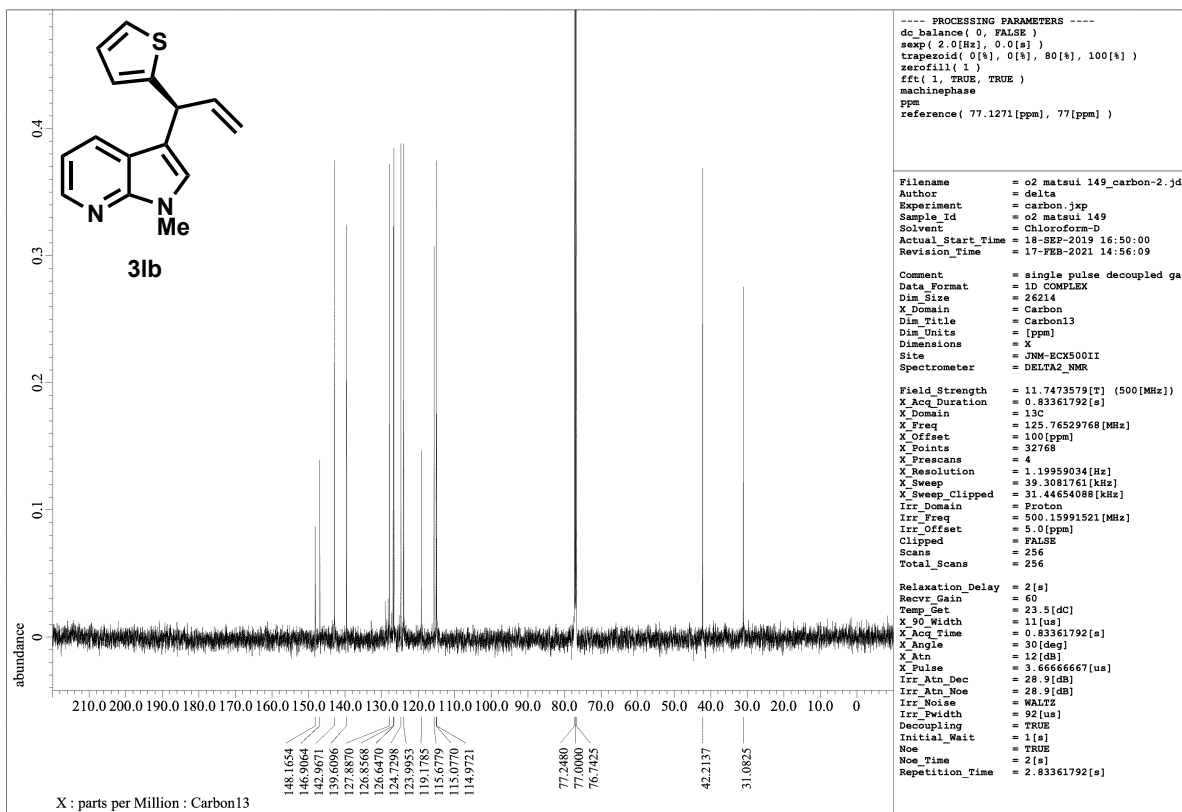

mV

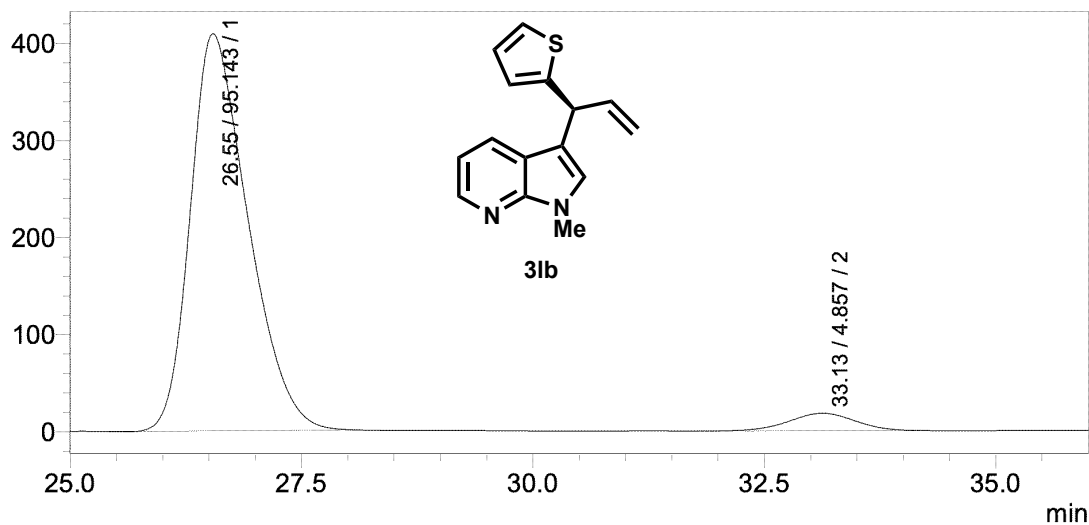

| Peak# | Ret. Time | Area%   |
|-------|-----------|---------|
| 1     | 26.55     | 95.143  |
| 2     | 33.13     | 4.857   |
| Total |           | 100.000 |

mV

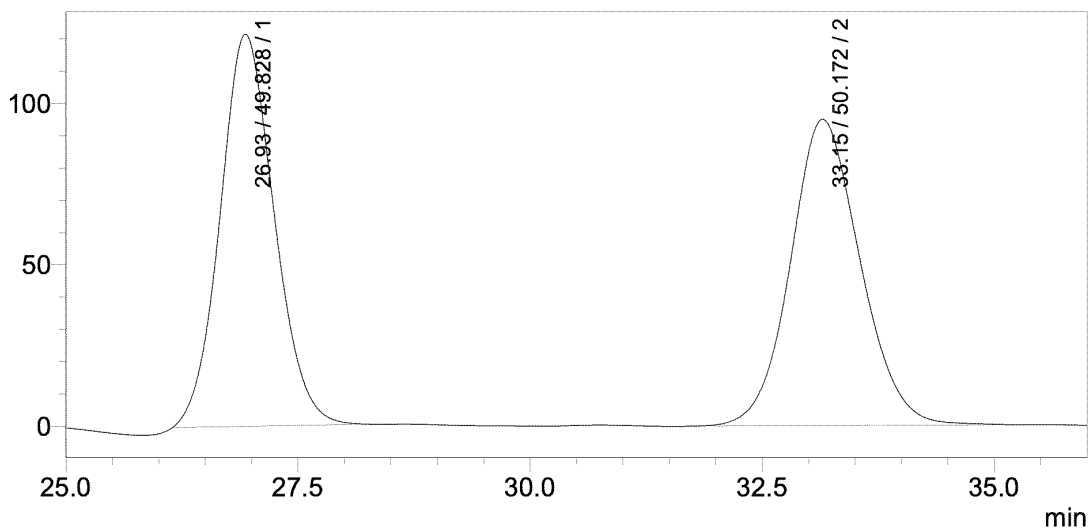

| Peak# | Ret. Time | Area%   |
|-------|-----------|---------|
| 1     | 26.93     | 49.828  |
| 2     | 33.15     | 50.172  |
| Total |           | 100.000 |

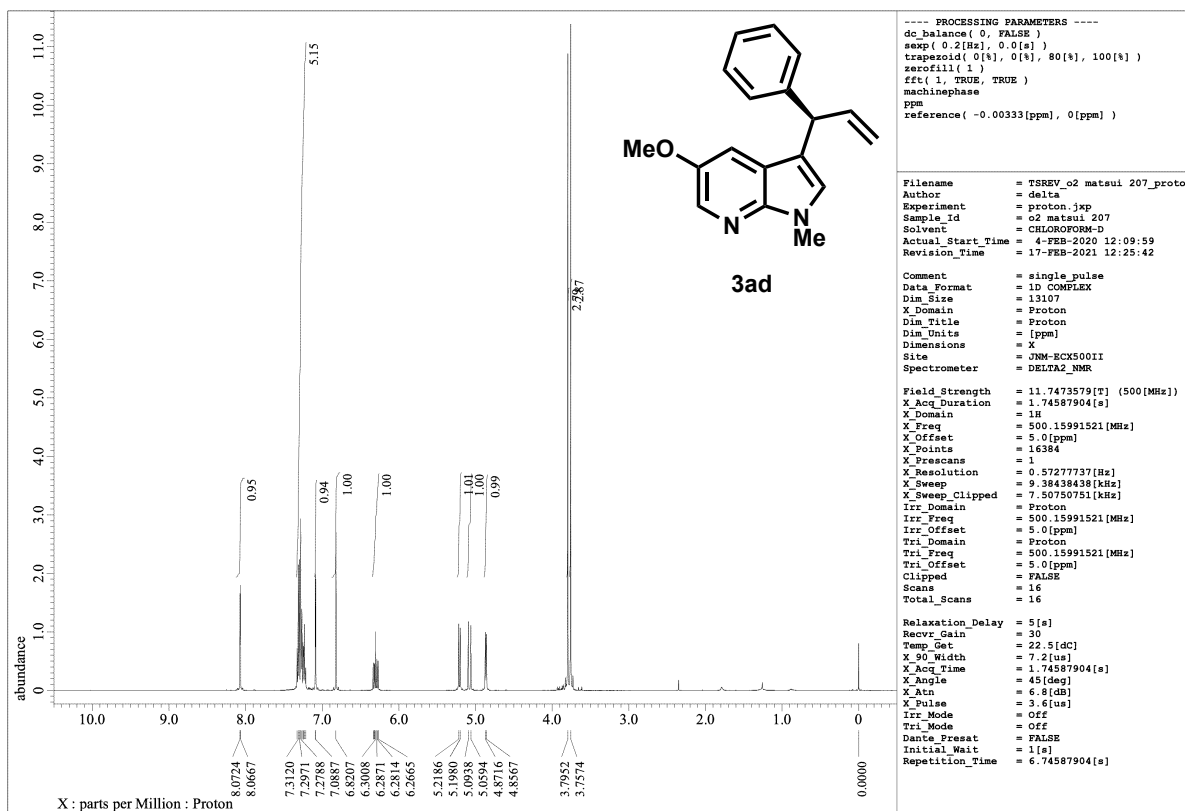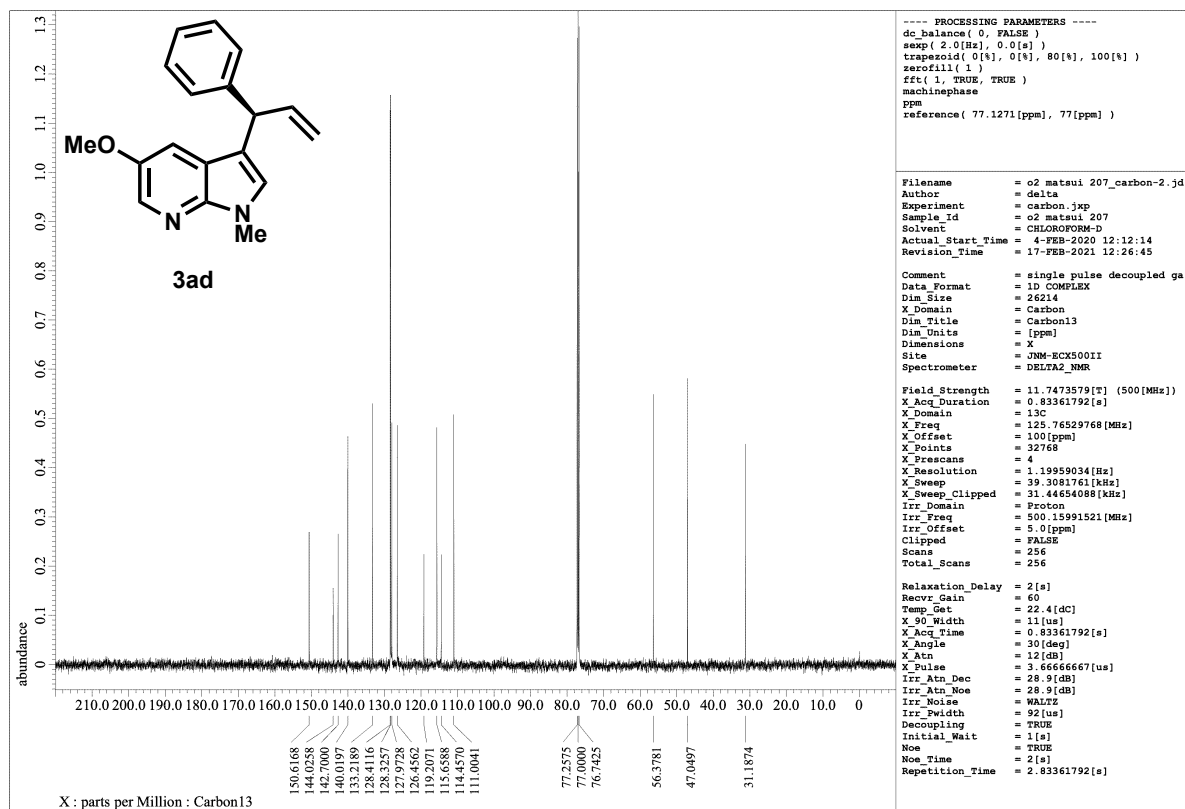

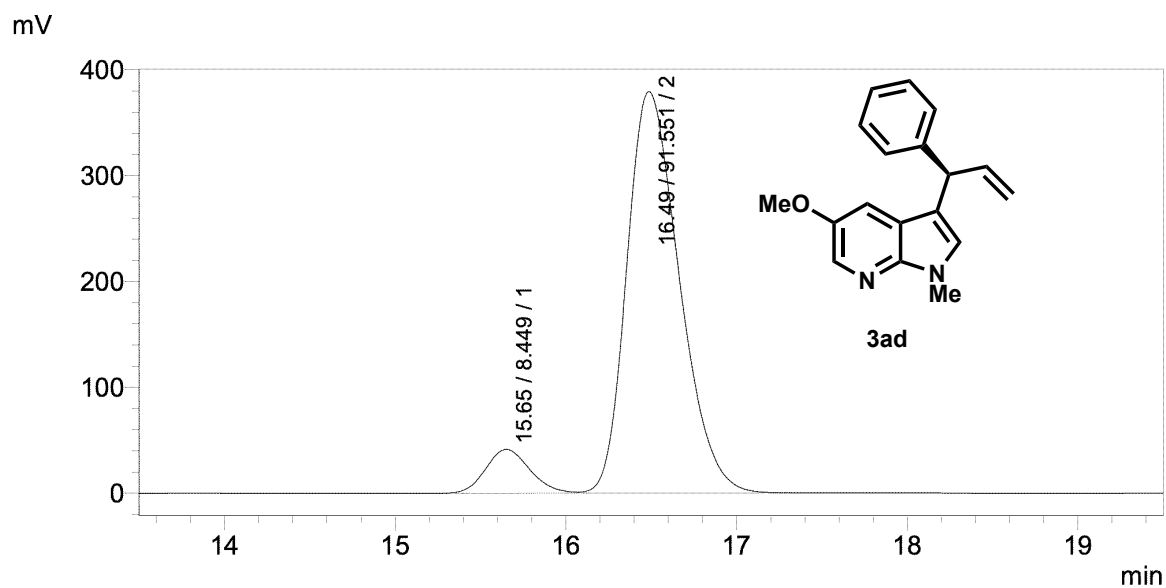

| Peak# | Ret. Time | Area%   |
|-------|-----------|---------|
| 1     | 15.65     | 8.449   |
| 2     | 16.49     | 91.551  |
| Total |           | 100.000 |

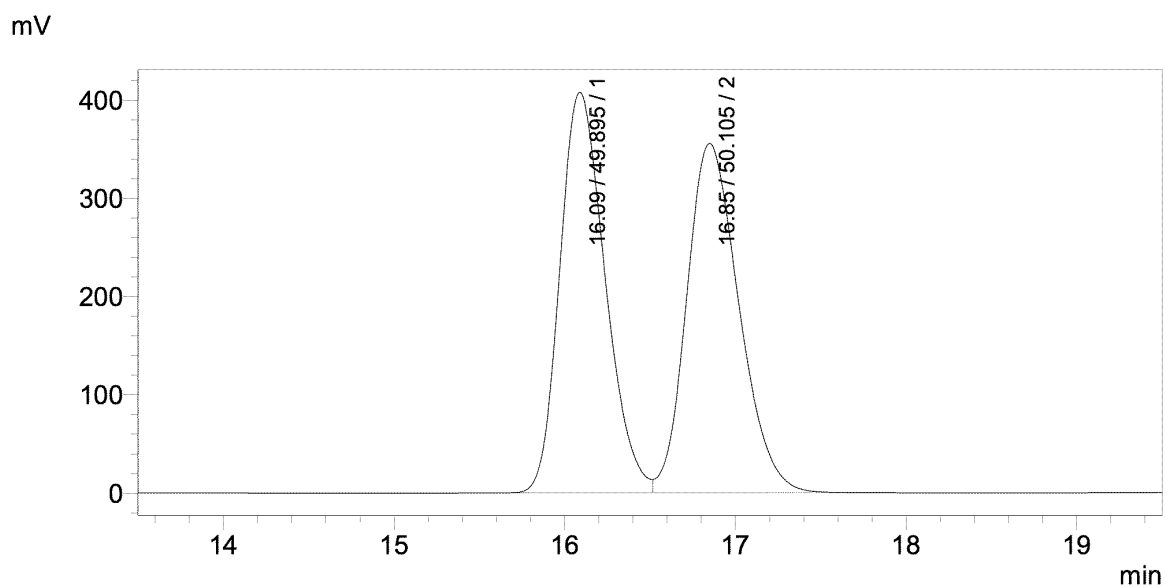

| Peak# | Ret. Time | Area%   |
|-------|-----------|---------|
| 1     | 16.09     | 49.895  |
| 2     | 16.85     | 50.105  |
| Total |           | 100.000 |

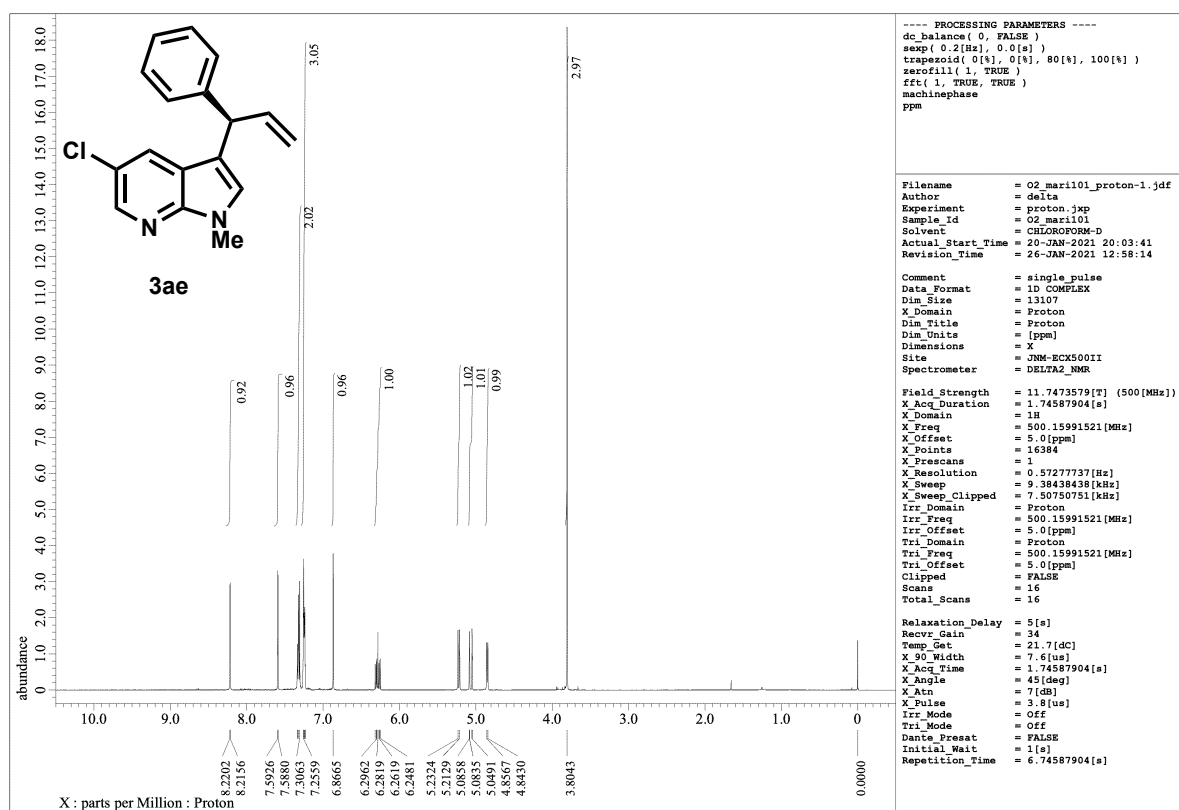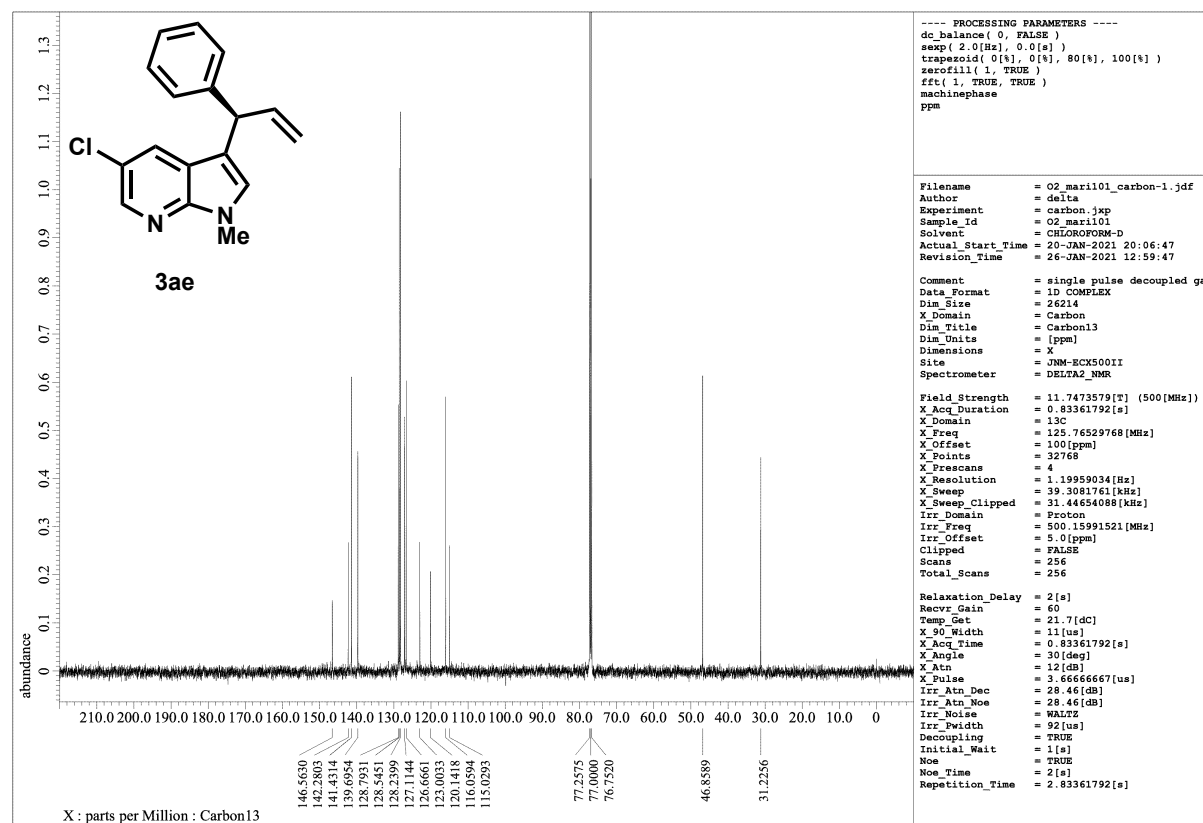

mV

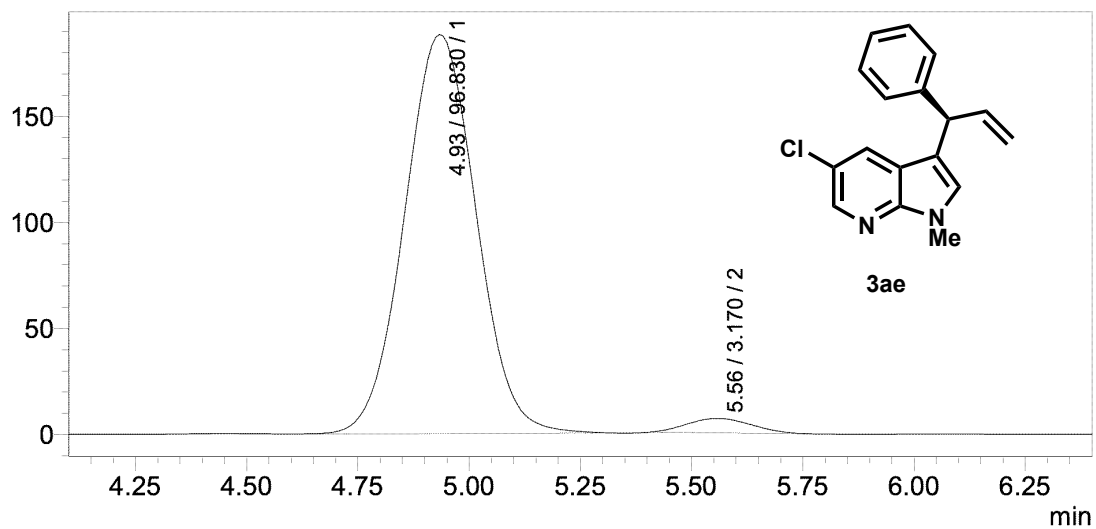

| Peak# | Ret. Time | Area%   |
|-------|-----------|---------|
| 1     | 4.93      | 96.830  |
| 2     | 5.56      | 3.170   |
| Total |           | 100.000 |

mV

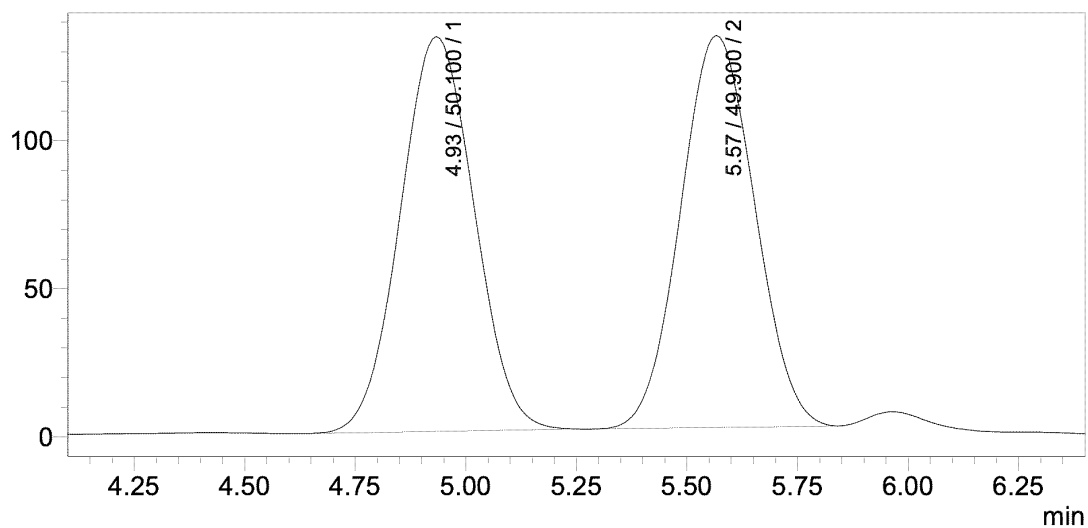

| Peak# | Ret. Time | Area%   |
|-------|-----------|---------|
| 1     | 4.93      | 50.100  |
| 2     | 5.57      | 49.900  |
| Total |           | 100.000 |

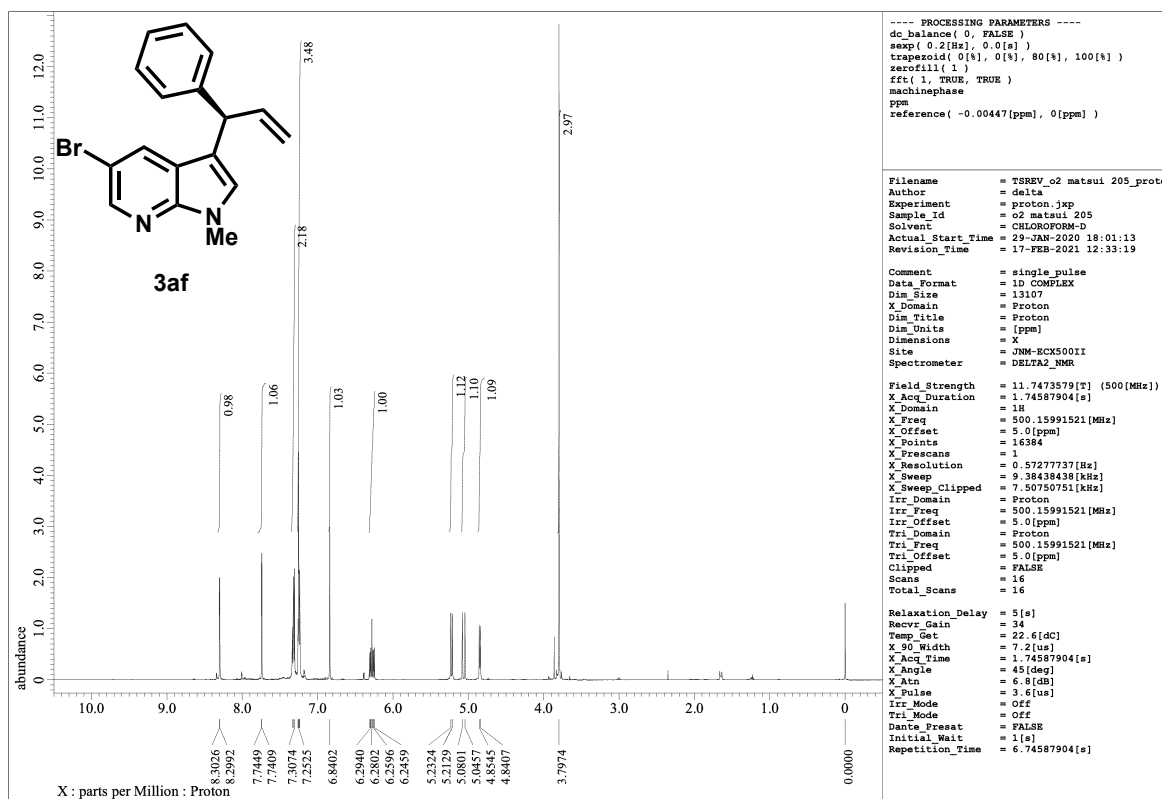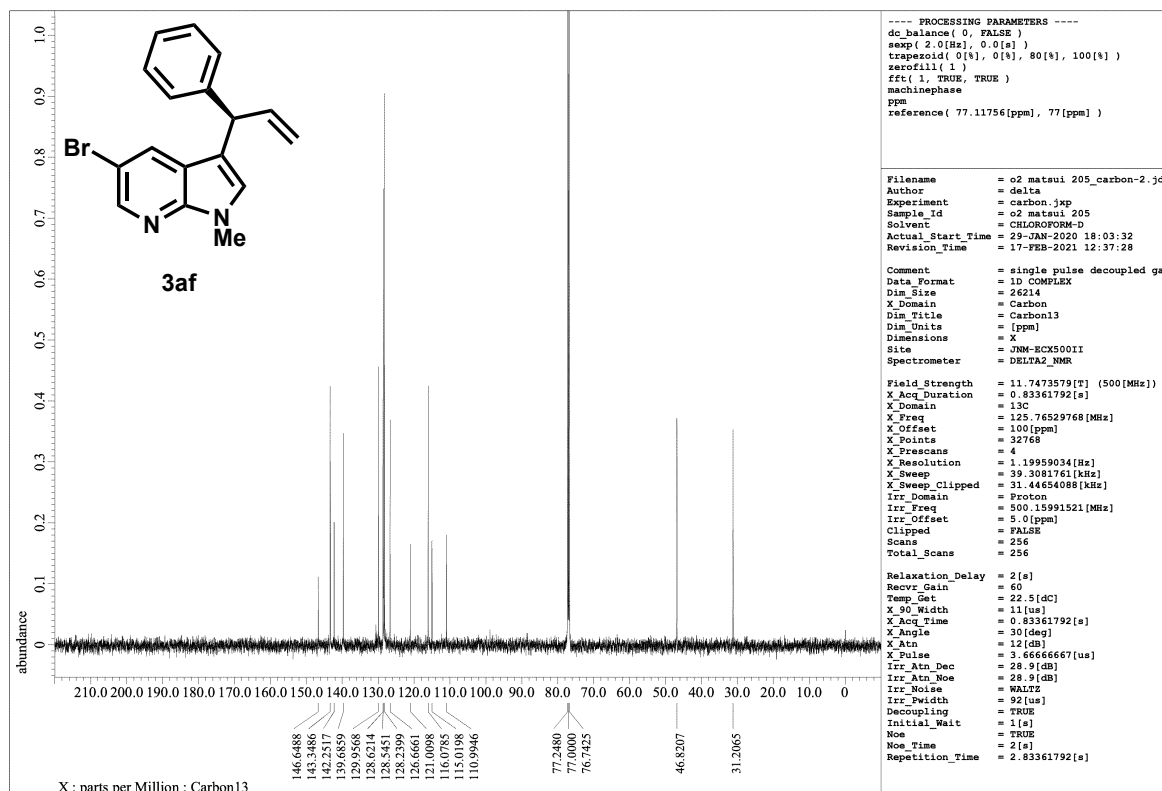

mV

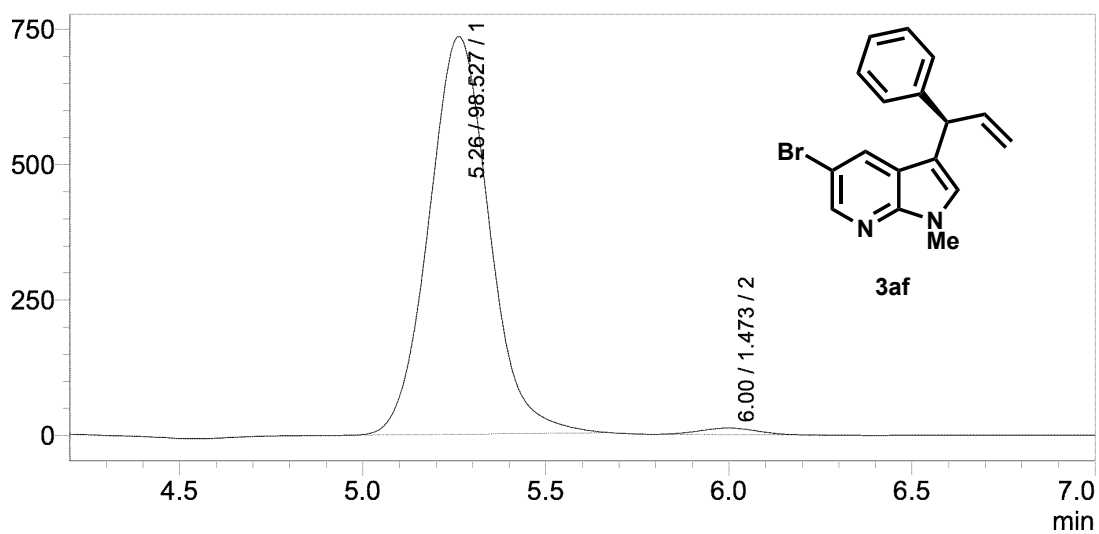

| Peak# | Ret. Time | Area%   |
|-------|-----------|---------|
| 1     | 5.26      | 98.527  |
| 2     | 6.00      | 1.473   |
| Total |           | 100.000 |

mV

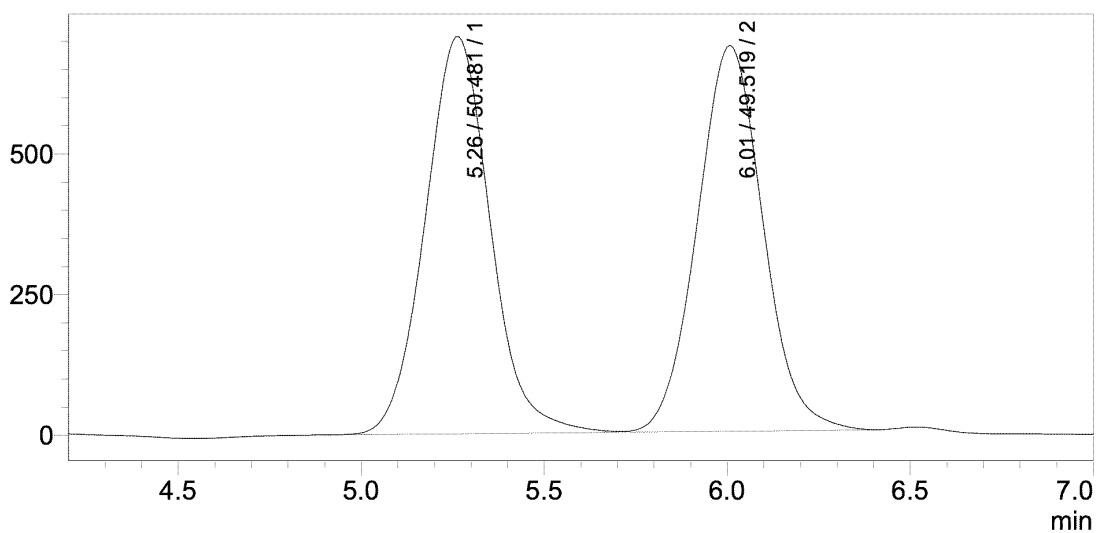

| Peak# | Ret. Time | Area%   |
|-------|-----------|---------|
| 1     | 5.26      | 50.481  |
| 2     | 6.01      | 49.519  |
| Total |           | 100.000 |

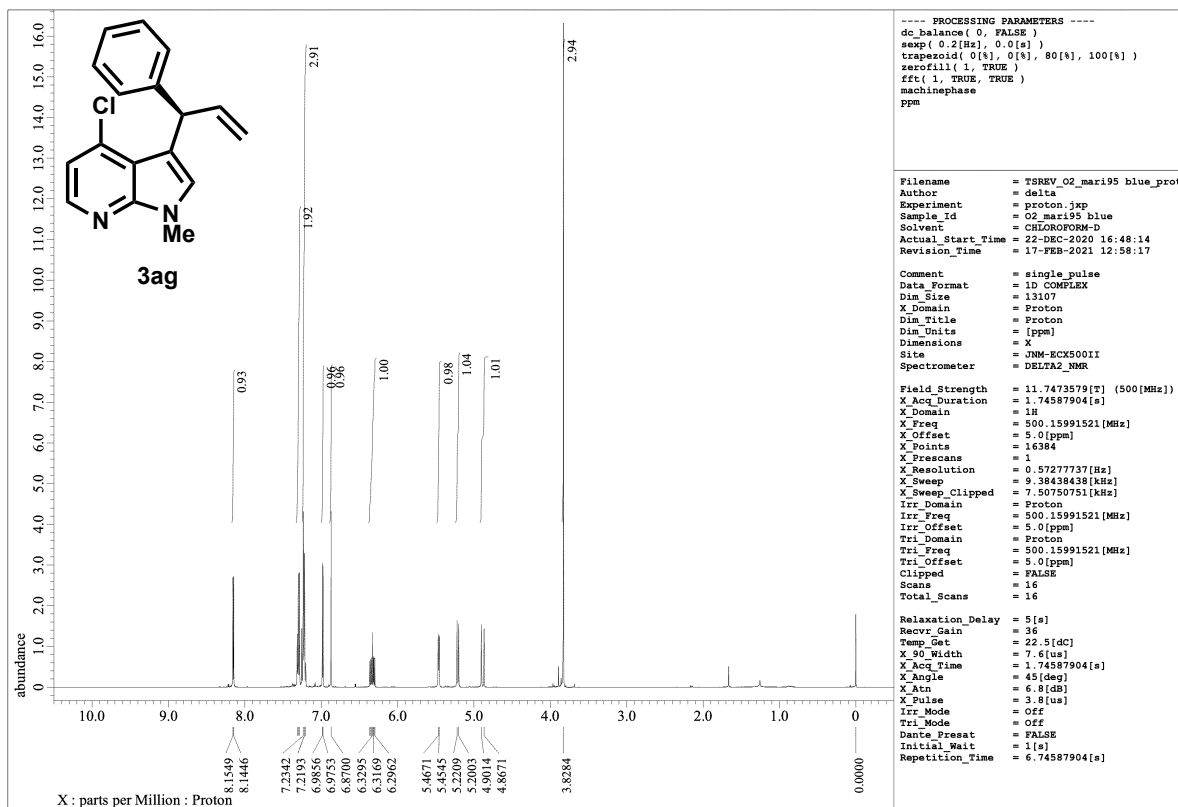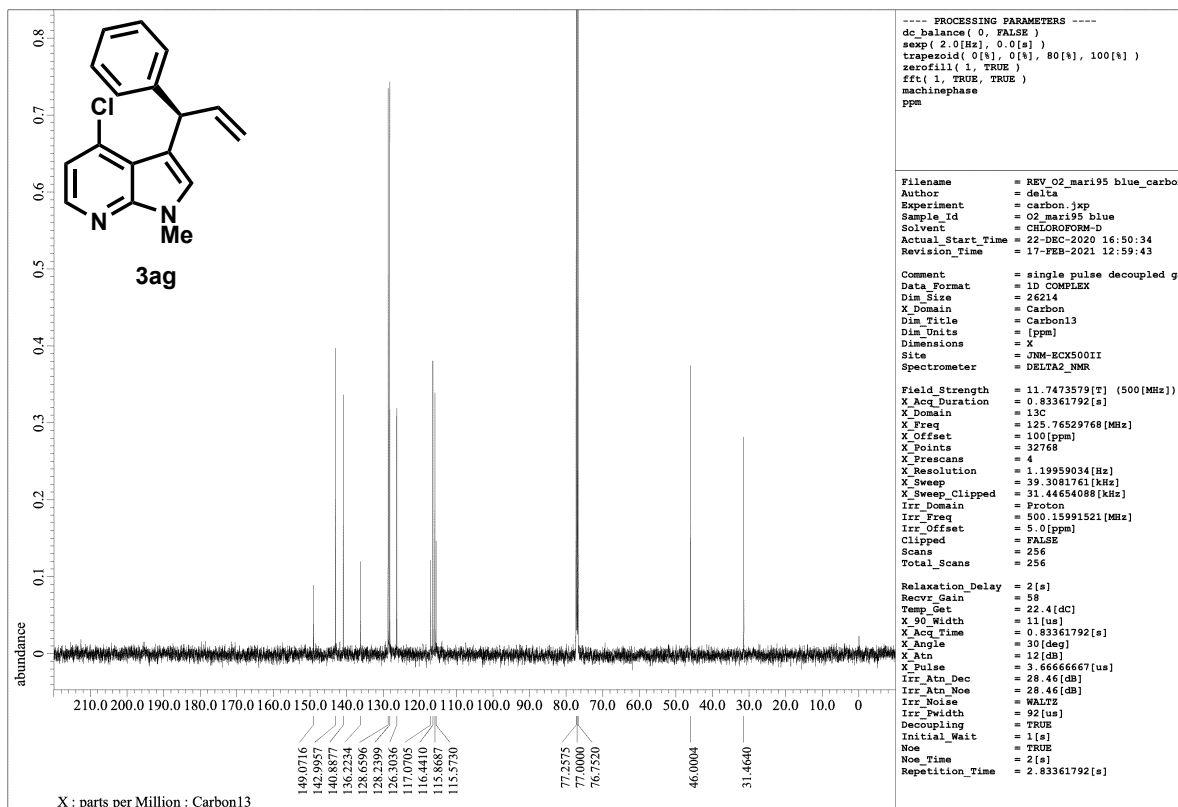

mV

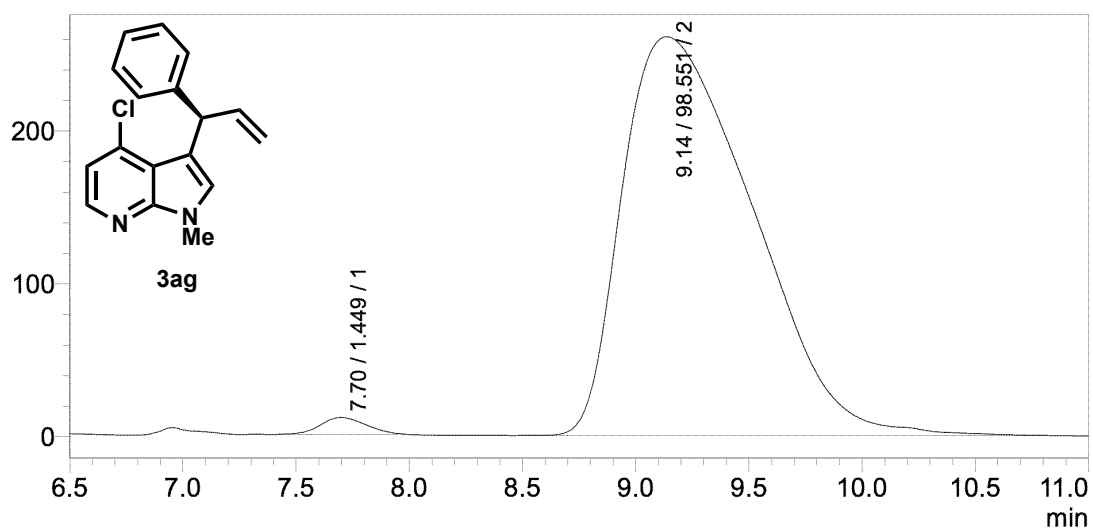

| Peak# | Ret. Time | Area%   |
|-------|-----------|---------|
| 1     | 7.70      | 1.449   |
| 2     | 9.14      | 98.551  |
| Total |           | 100.000 |

mV

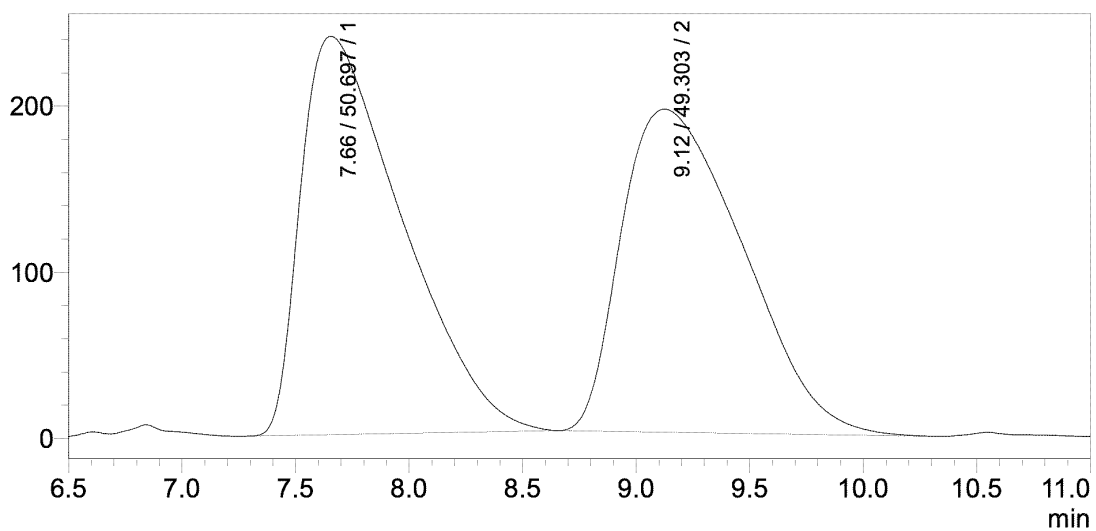

| Peak# | Ret. Time | Area%   |
|-------|-----------|---------|
| 1     | 7.66      | 50.697  |
| 2     | 9.12      | 49.303  |
| Total |           | 100.000 |

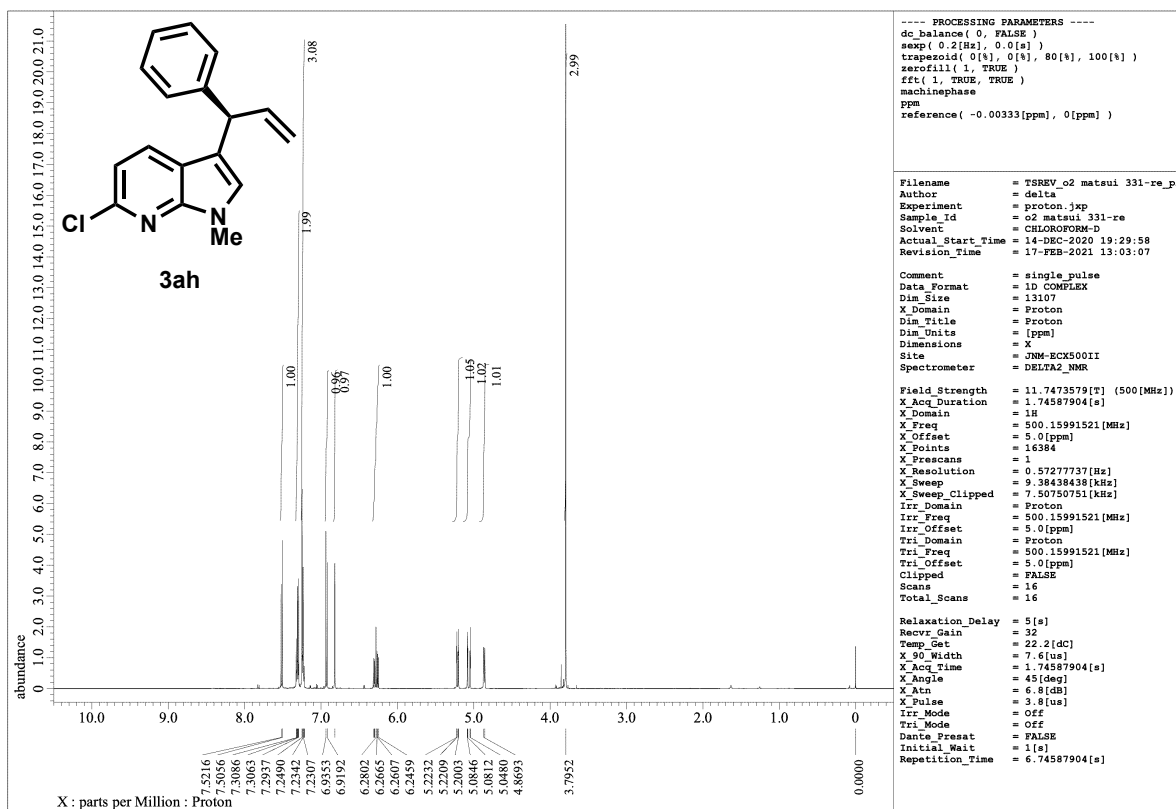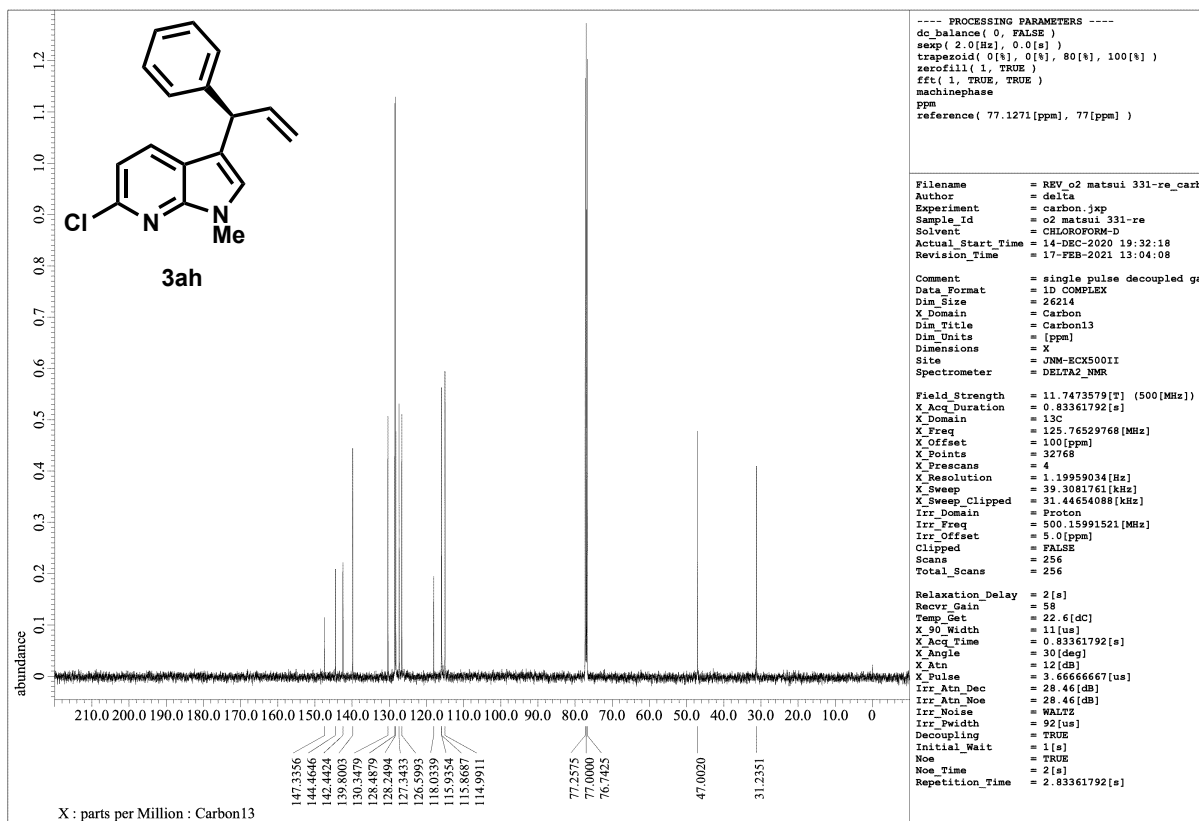

mV

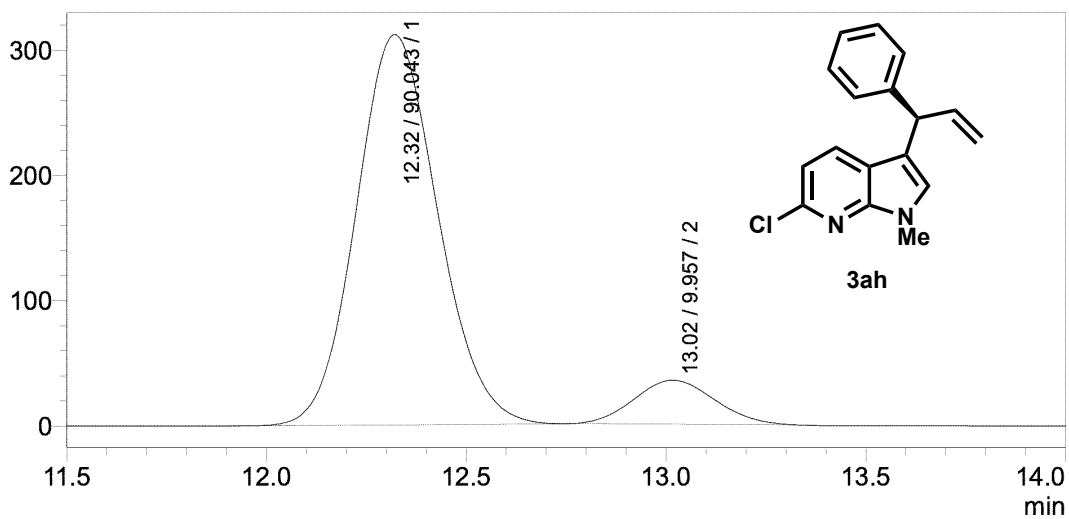

| Peak# | Ret. Time | Area%   |
|-------|-----------|---------|
| 1     | 12.32     | 90.043  |
| 2     | 13.02     | 9.957   |
| Total |           | 100.000 |

mV

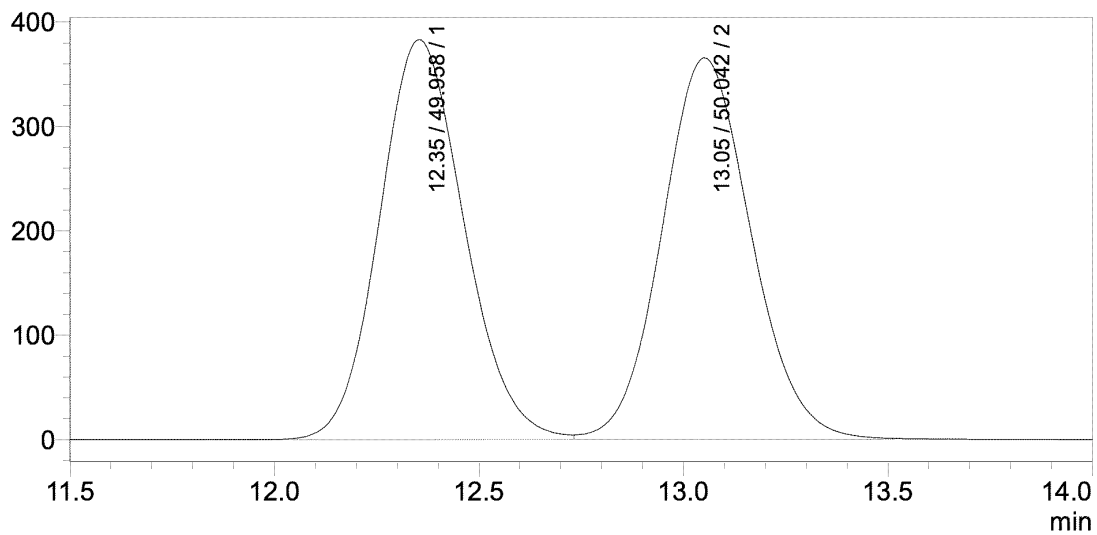

| Peak# | Ret. Time | Area%   |
|-------|-----------|---------|
| 1     | 12.35     | 49.958  |
| 2     | 13.05     | 50.042  |
| Total |           | 100.000 |

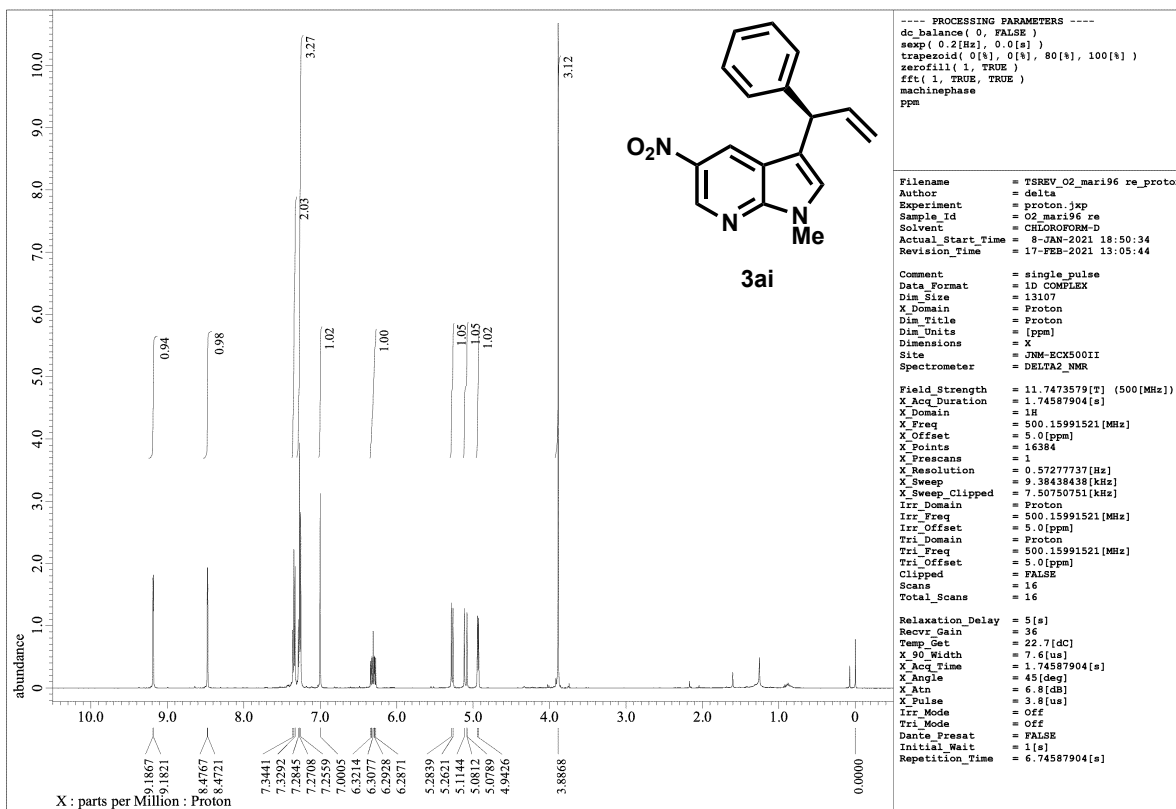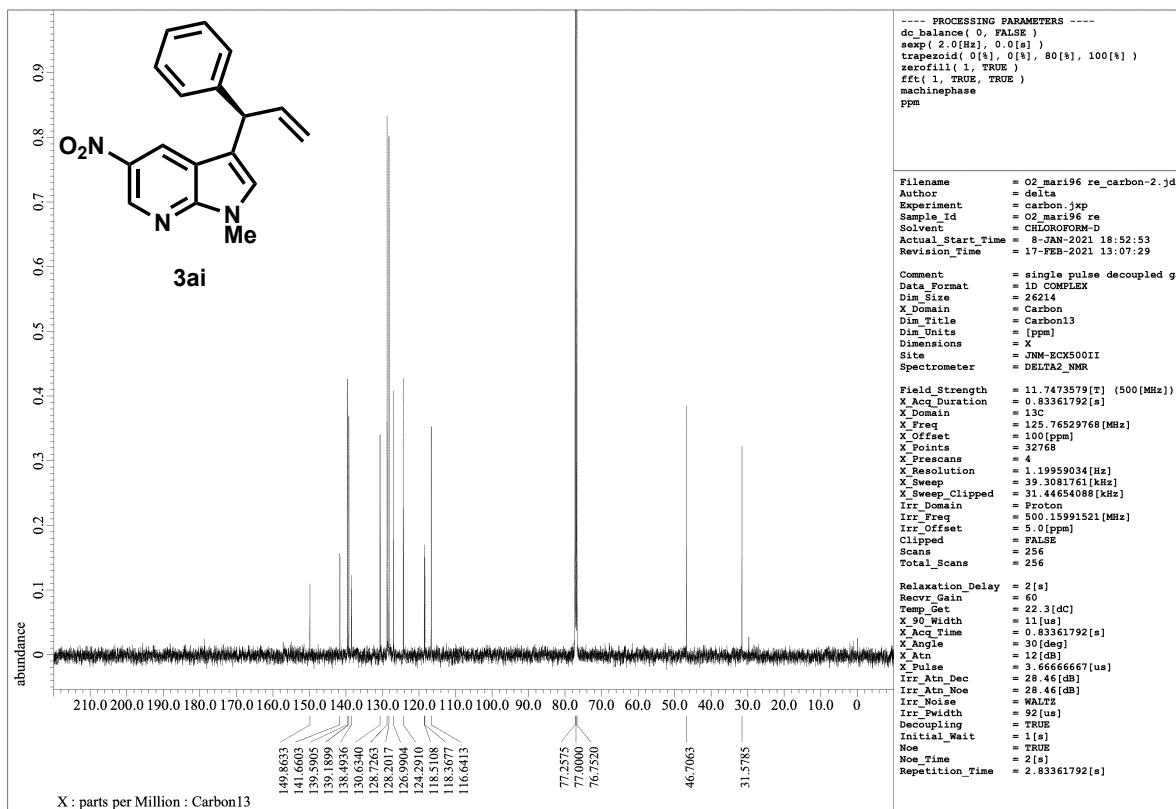

mV

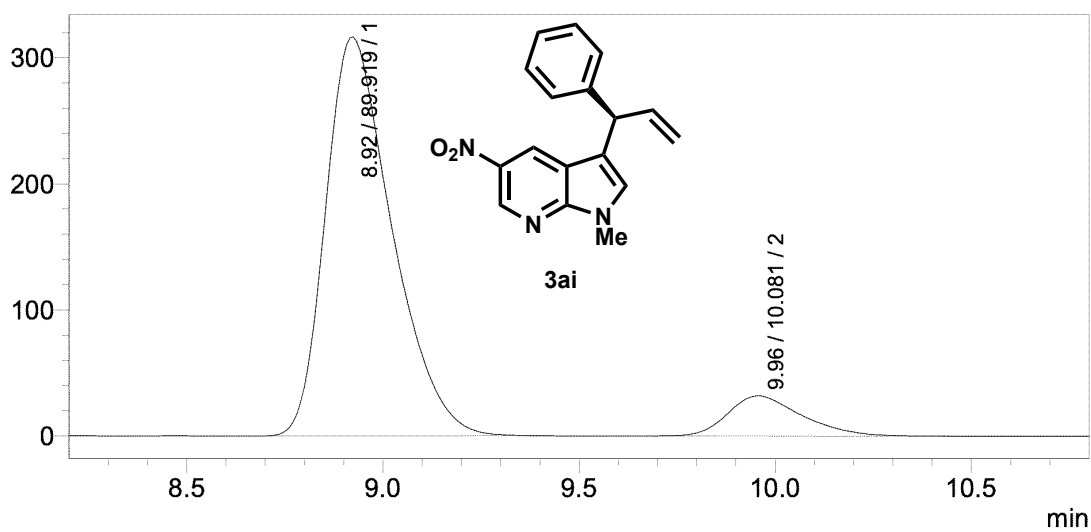

| Peak# | Ret. Time | Area%   |
|-------|-----------|---------|
| 1     | 8.92      | 89.919  |
| 2     | 9.96      | 10.081  |
| Total |           | 100.000 |

mV

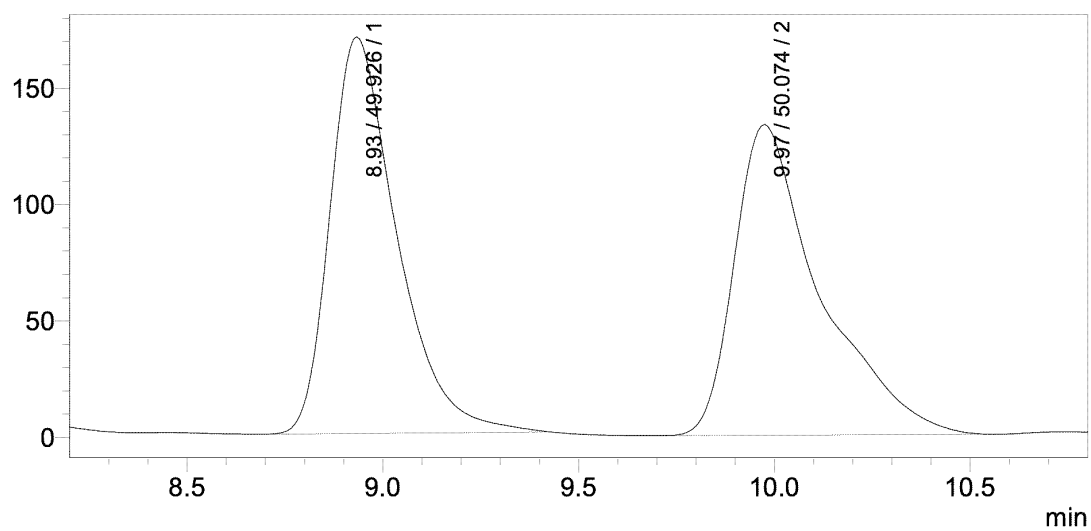

| Peak# | Ret. Time | Area%   |
|-------|-----------|---------|
| 1     | 8.93      | 49.926  |
| 2     | 9.97      | 50.074  |
| Total |           | 100.000 |

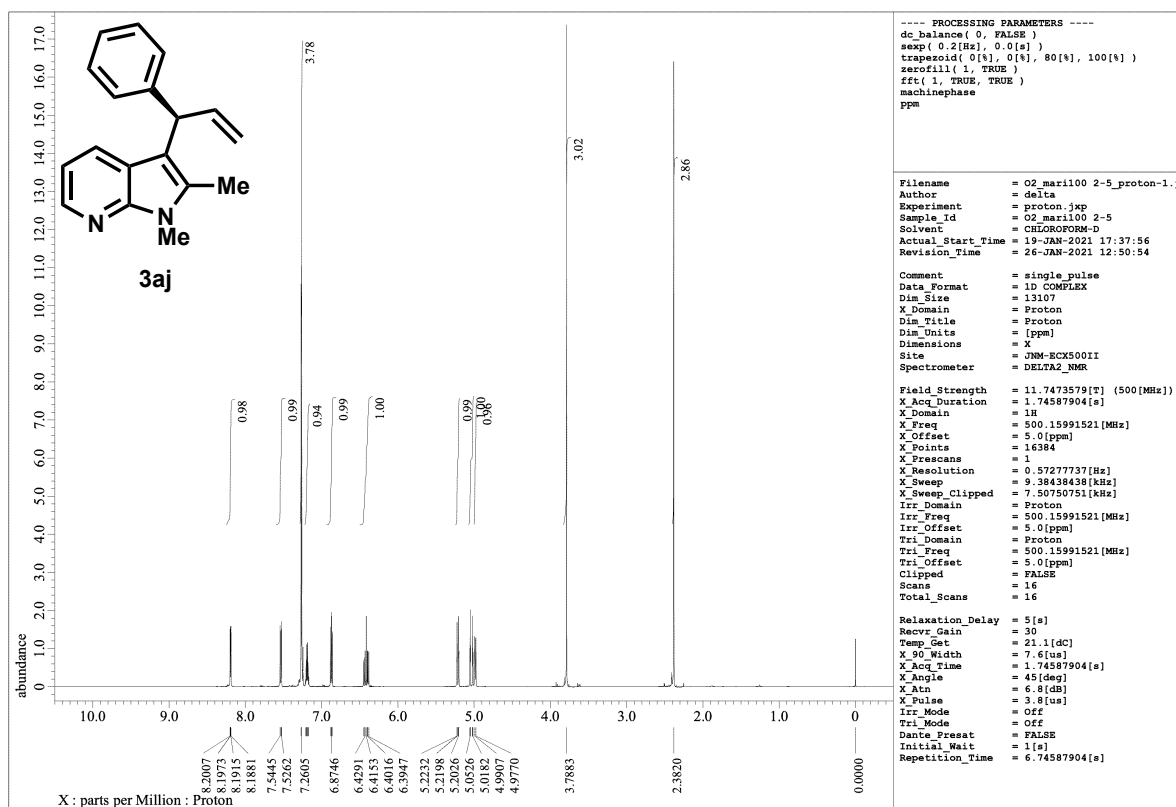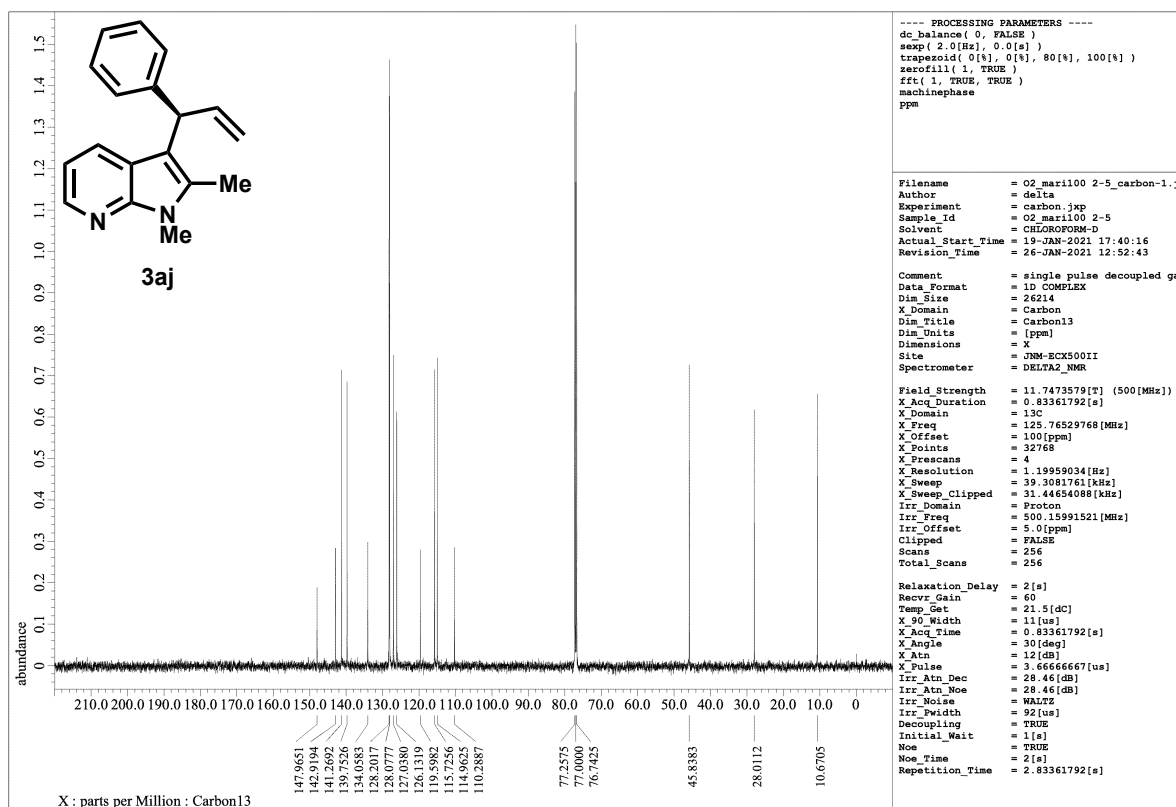

mV

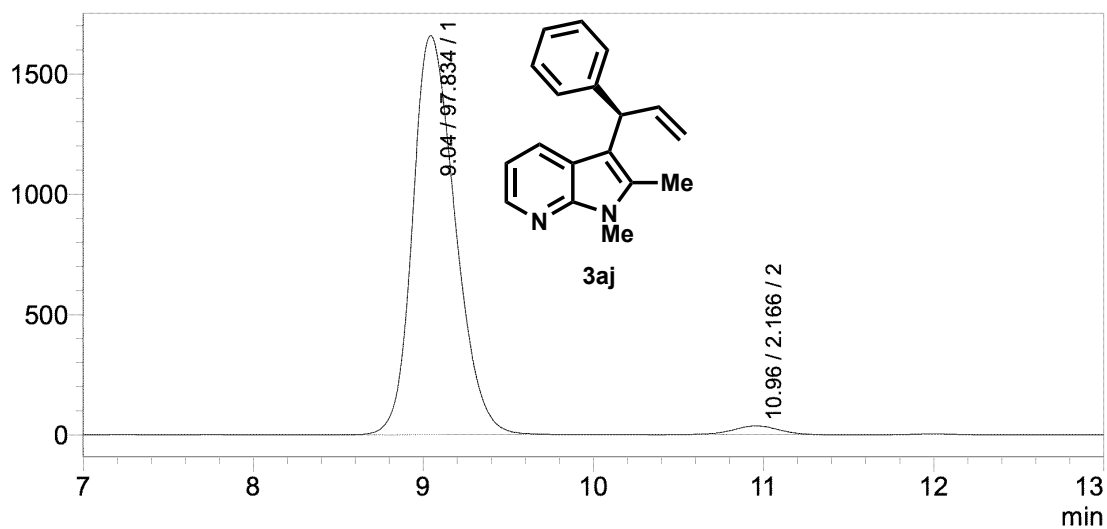

| Peak# | Ret. Time | Area%   |
|-------|-----------|---------|
| 1     | 9.04      | 97.834  |
| 2     | 10.96     | 2.166   |
| Total |           | 100.000 |

mV

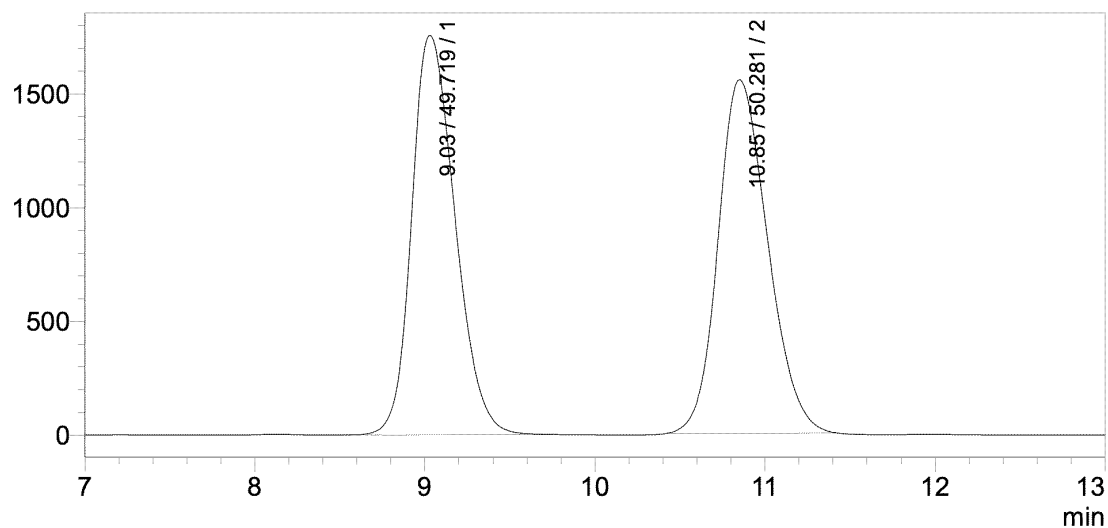

| Peak# | Ret. Time | Area%   |
|-------|-----------|---------|
| 1     | 9.03      | 49.719  |
| 2     | 10.85     | 50.281  |
| Total |           | 100.000 |

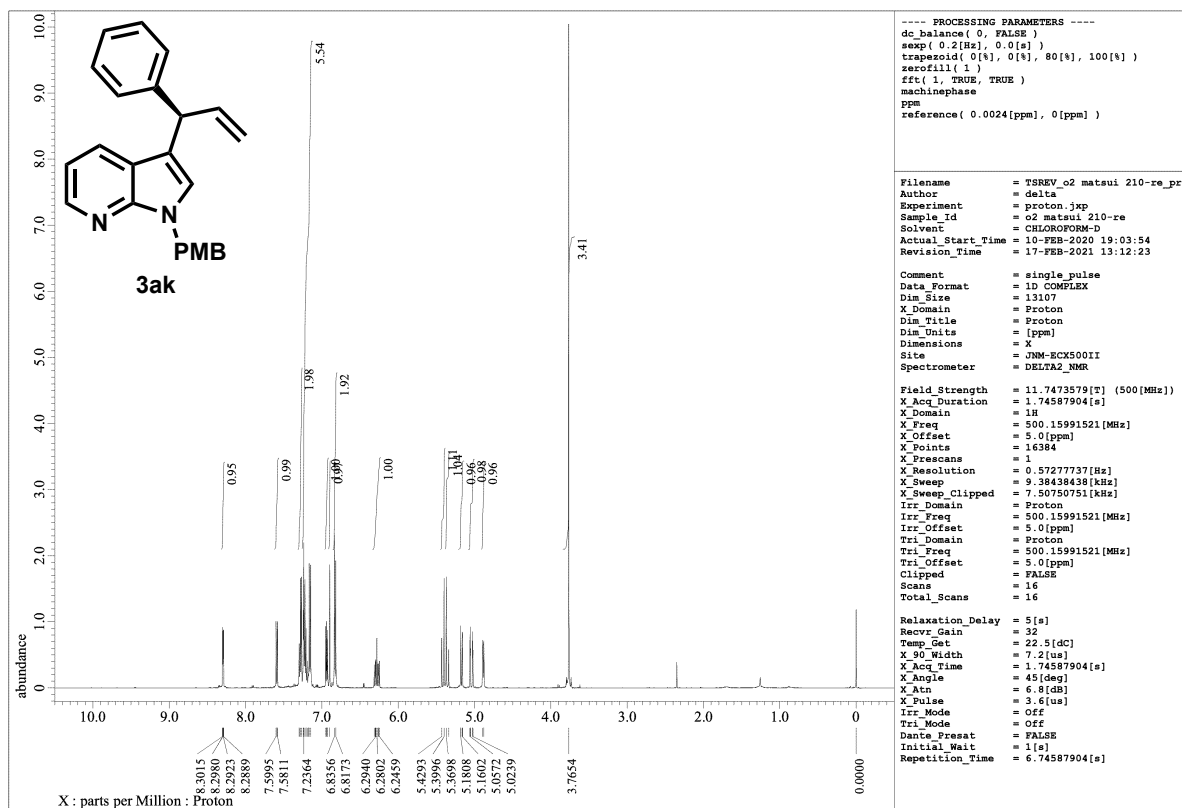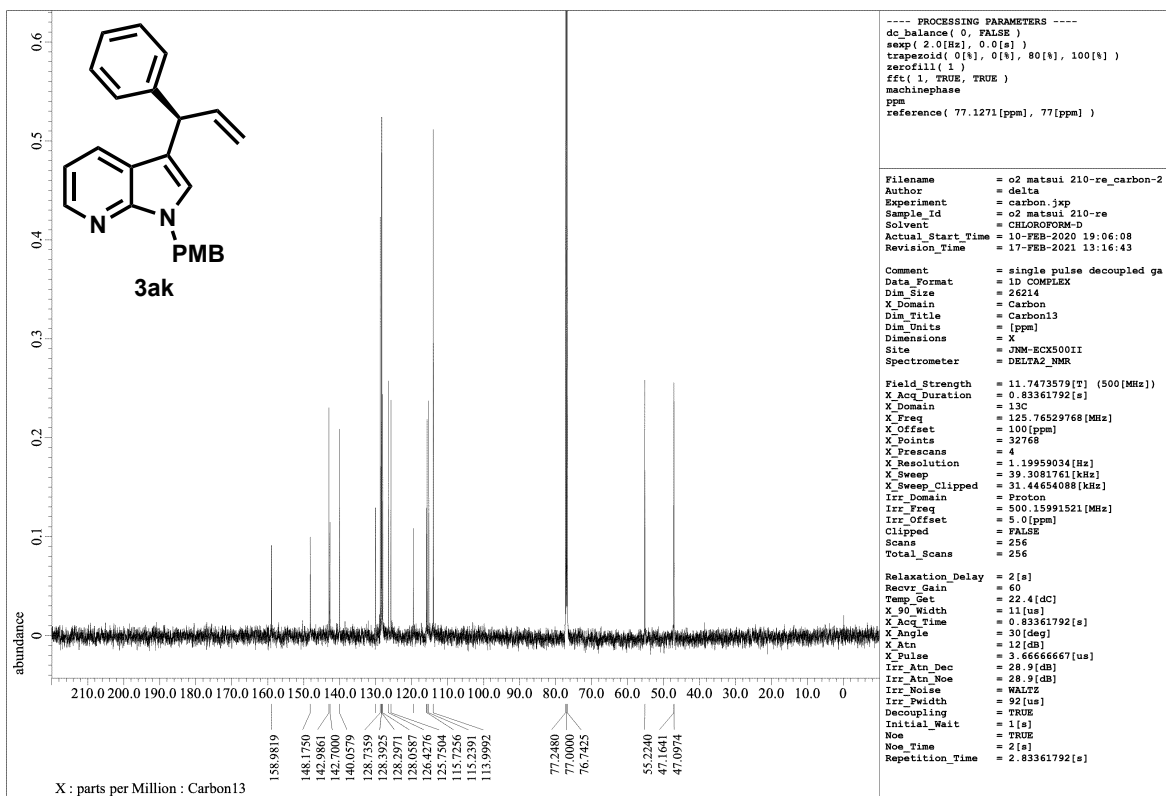

mV

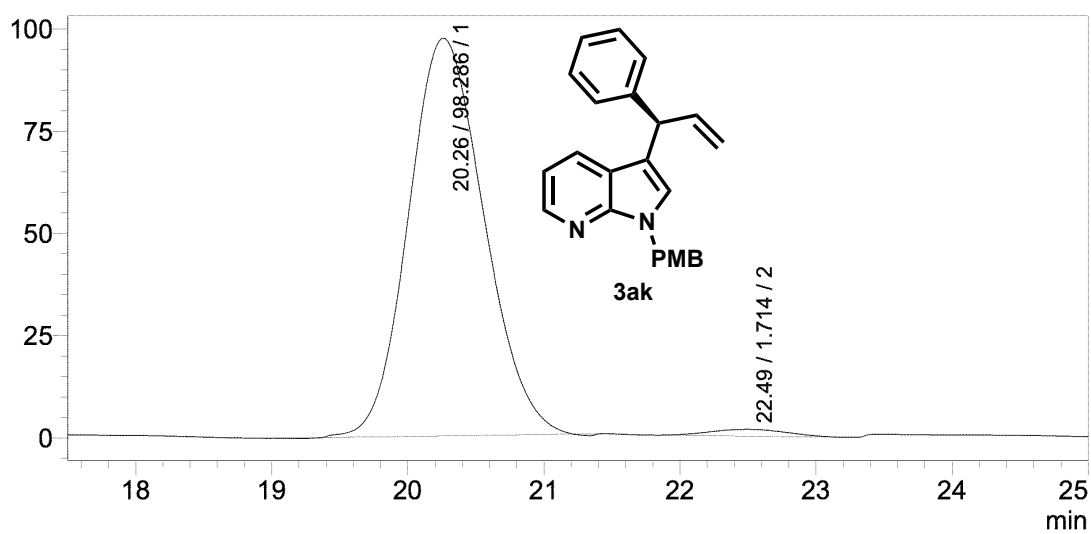

| Peak# | Ret. Time | Area%   |
|-------|-----------|---------|
| 1     | 20.26     | 98.286  |
| 2     | 22.49     | 1.714   |
| Total |           | 100.000 |

mV

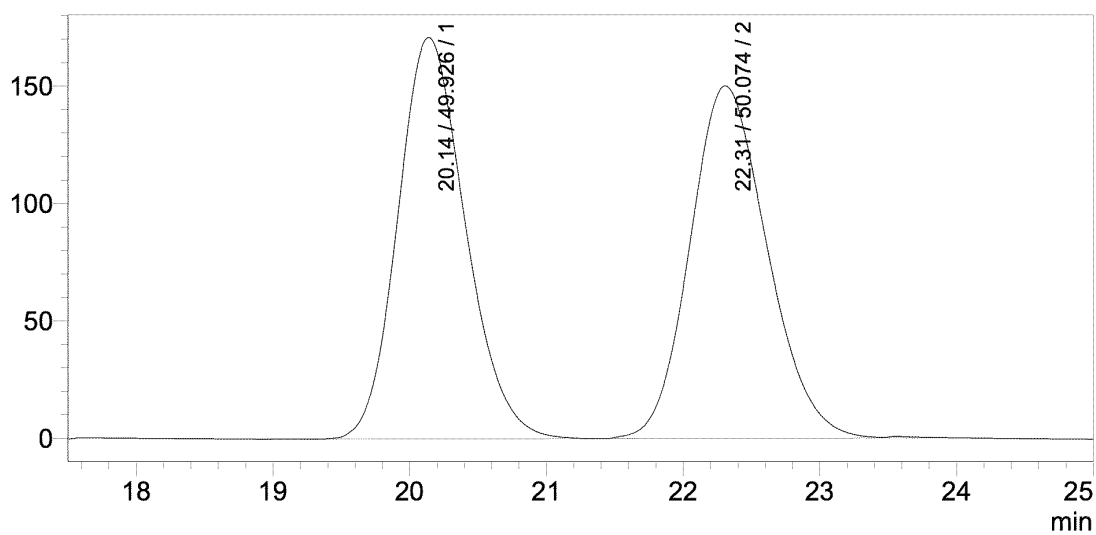

| Peak# | Ret. Time | Area%   |
|-------|-----------|---------|
| 1     | 20.14     | 49.926  |
| 2     | 22.31     | 50.074  |
| Total |           | 100.000 |

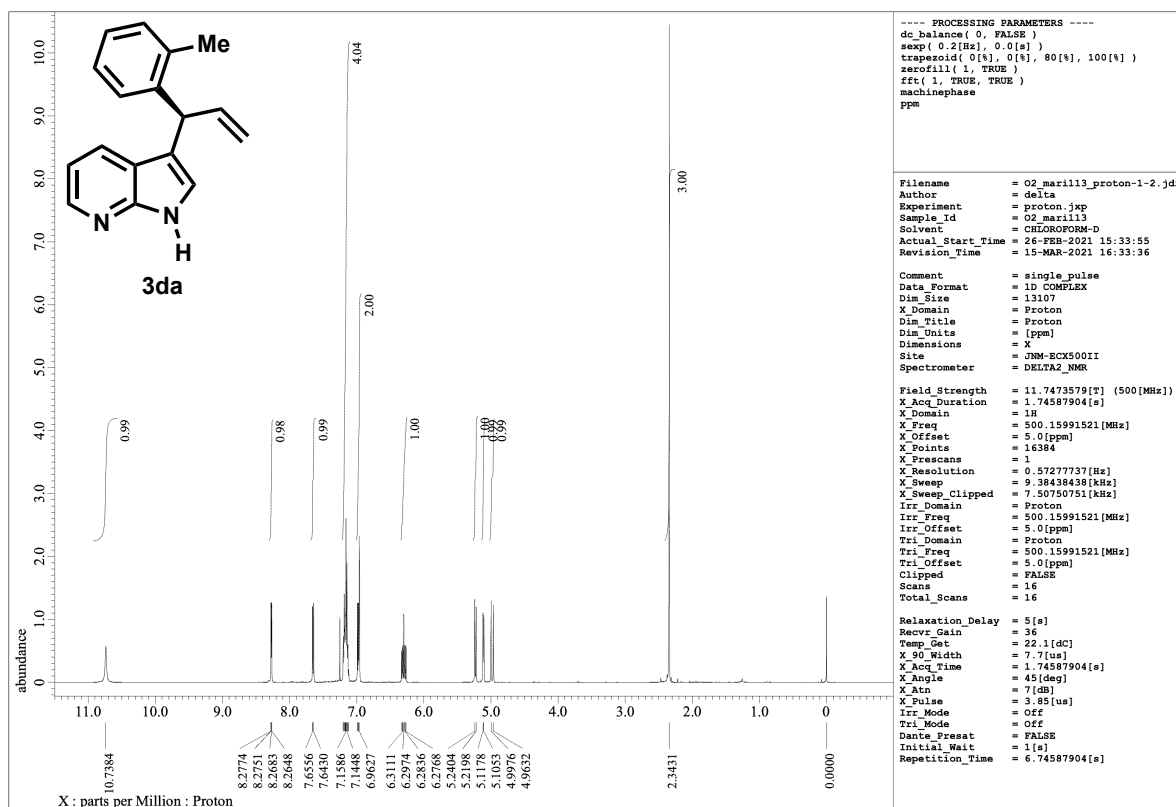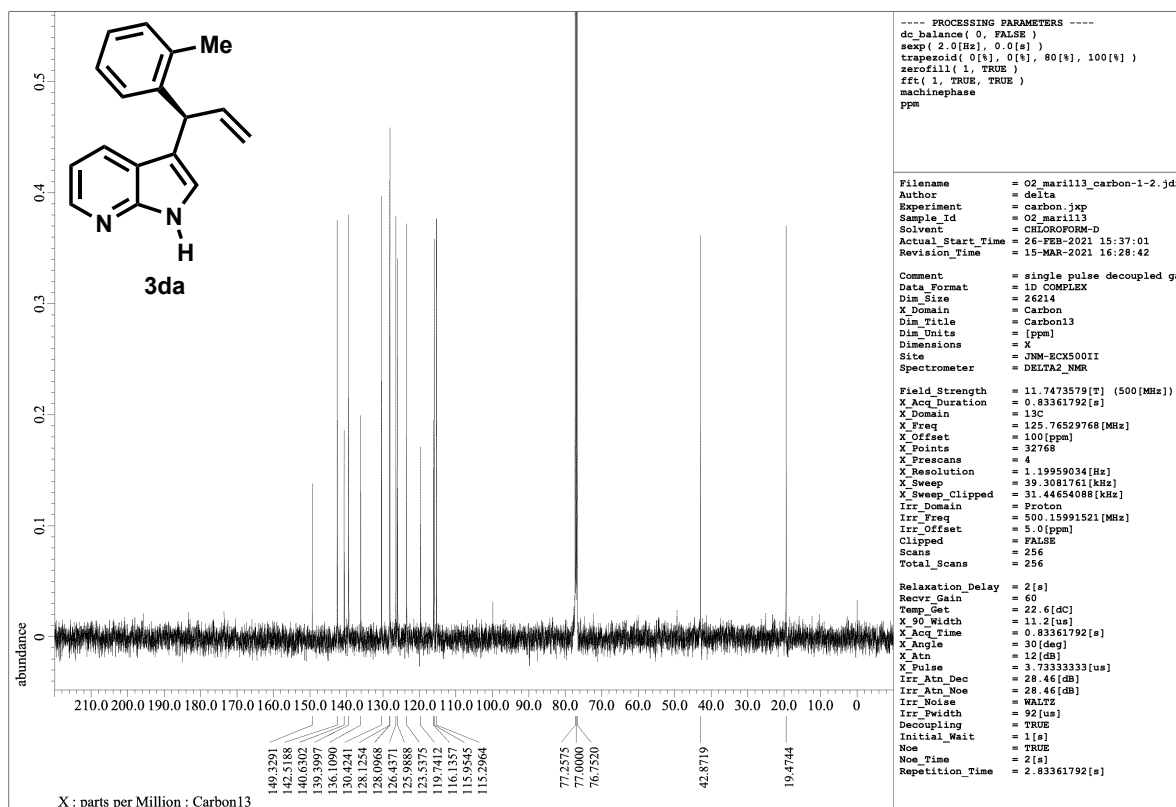

mV

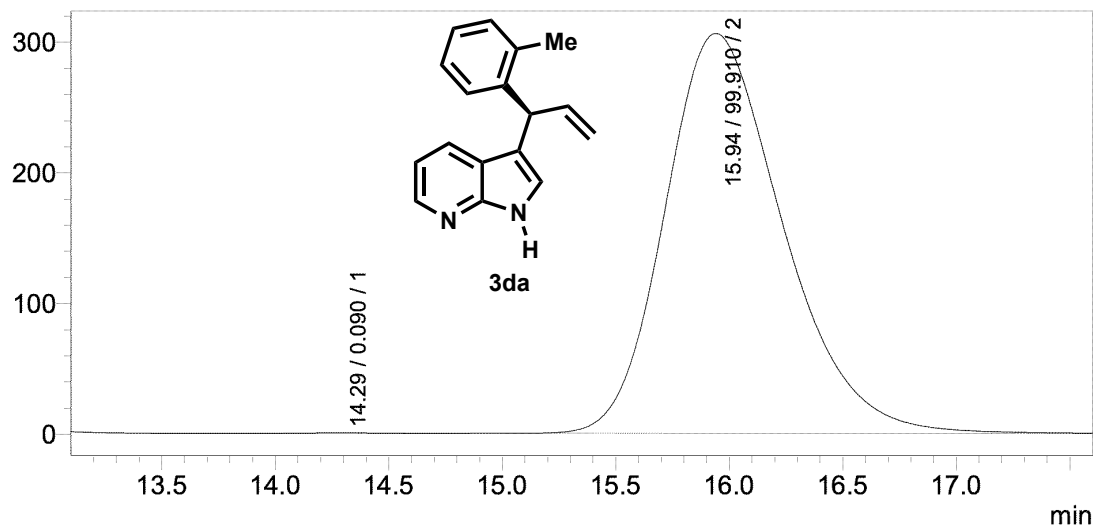

| Peak# | Ret. Time | Area%   |
|-------|-----------|---------|
| 1     | 14.29     | 0.090   |
| 2     | 15.94     | 99.910  |
| Total |           | 100.000 |

mV

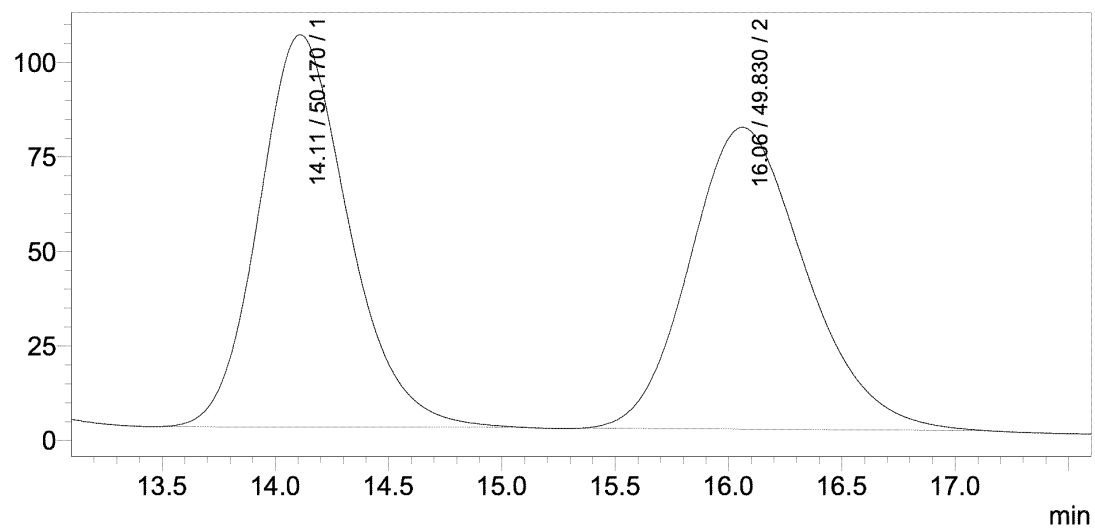

| Peak# | Ret. Time | Area%   |
|-------|-----------|---------|
| 1     | 14.11     | 50.170  |
| 2     | 16.06     | 49.830  |
| Total |           | 100.000 |

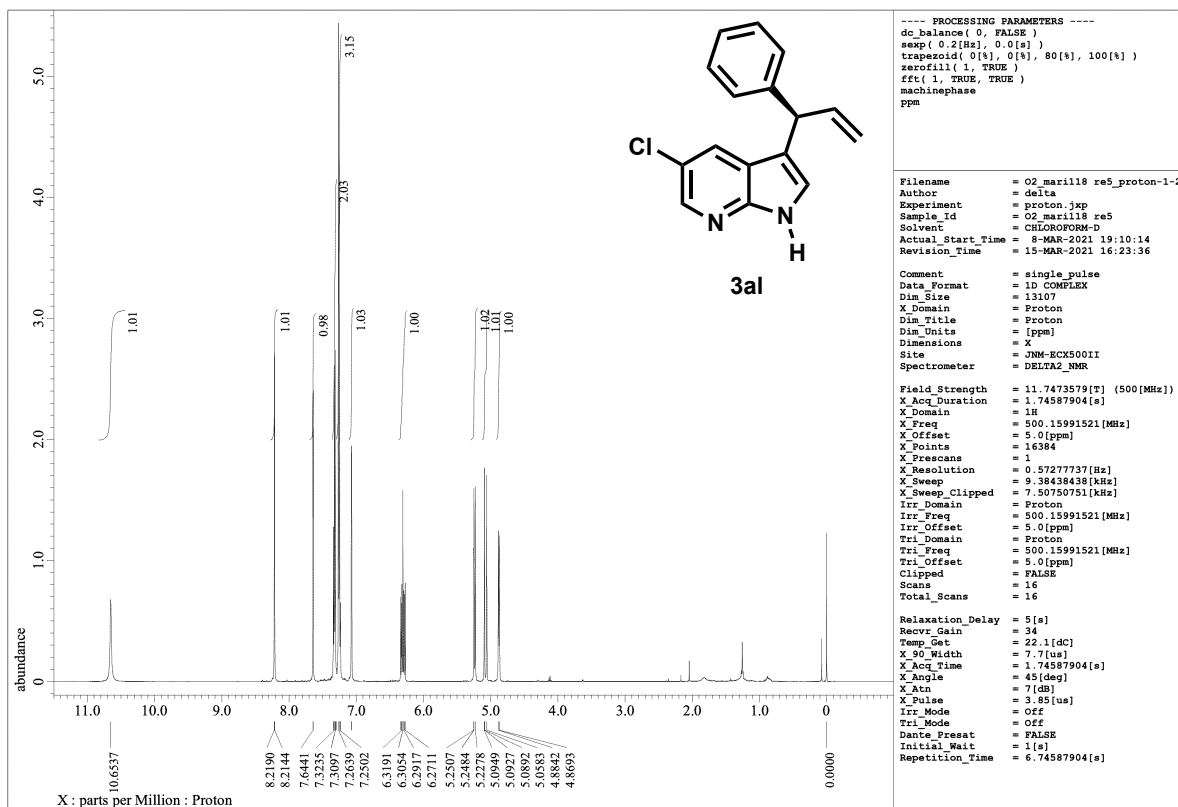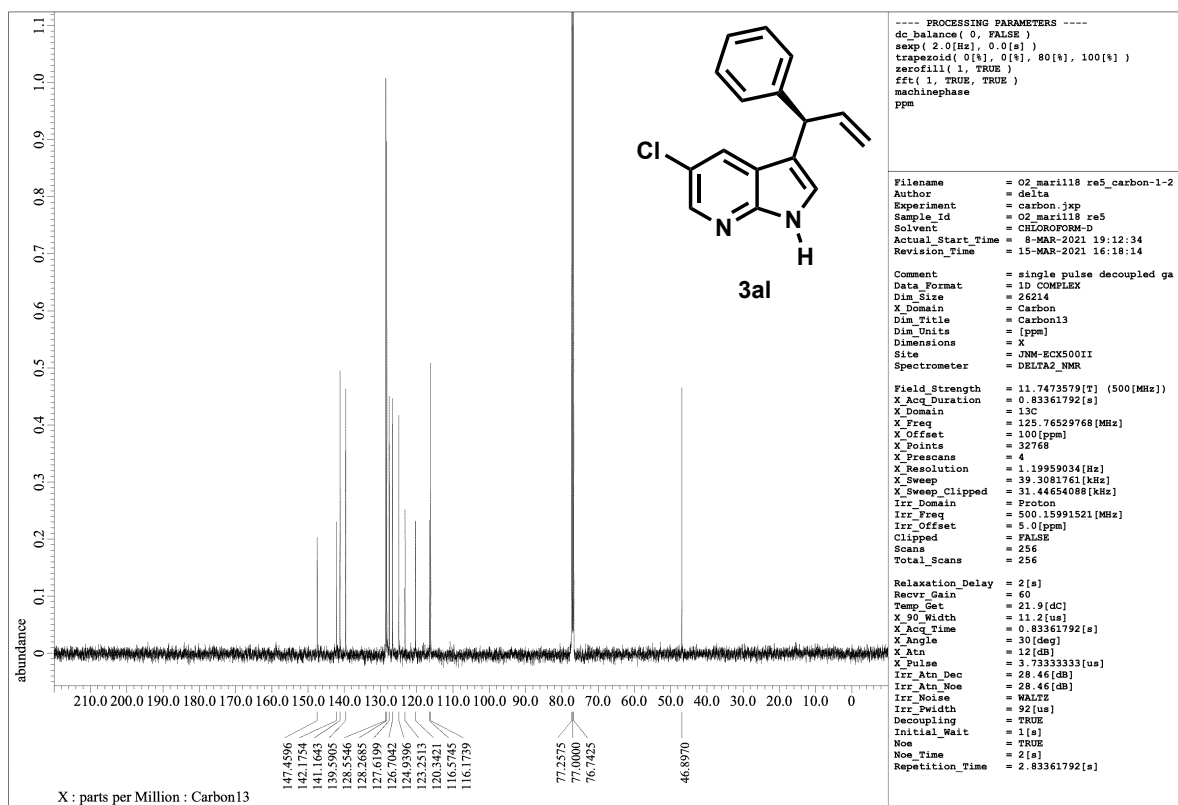

mV

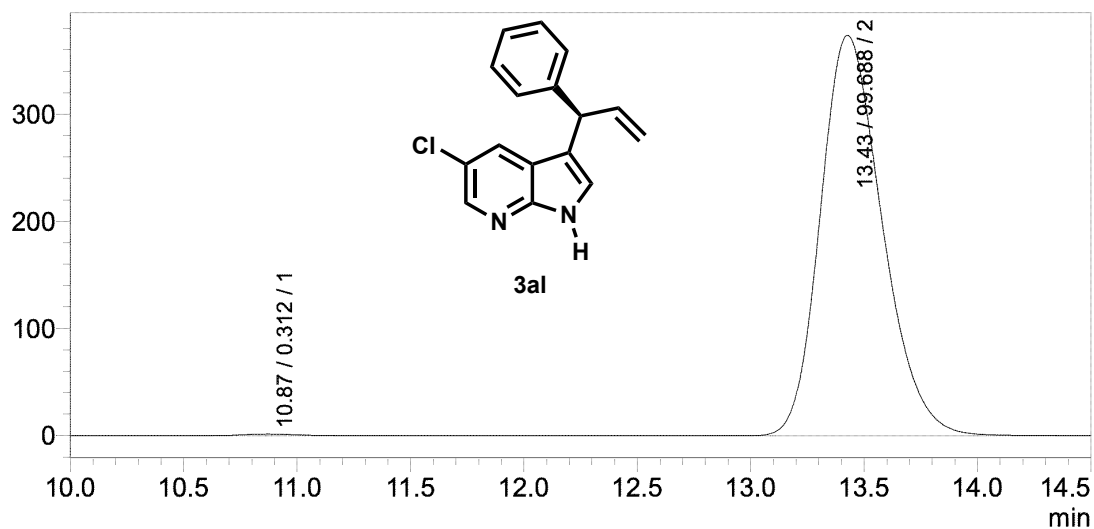

| Peak# | Ret. Time | Area%   |
|-------|-----------|---------|
| 1     | 10.87     | 0.312   |
| 2     | 13.43     | 99.688  |
| Total |           | 100.000 |

mV

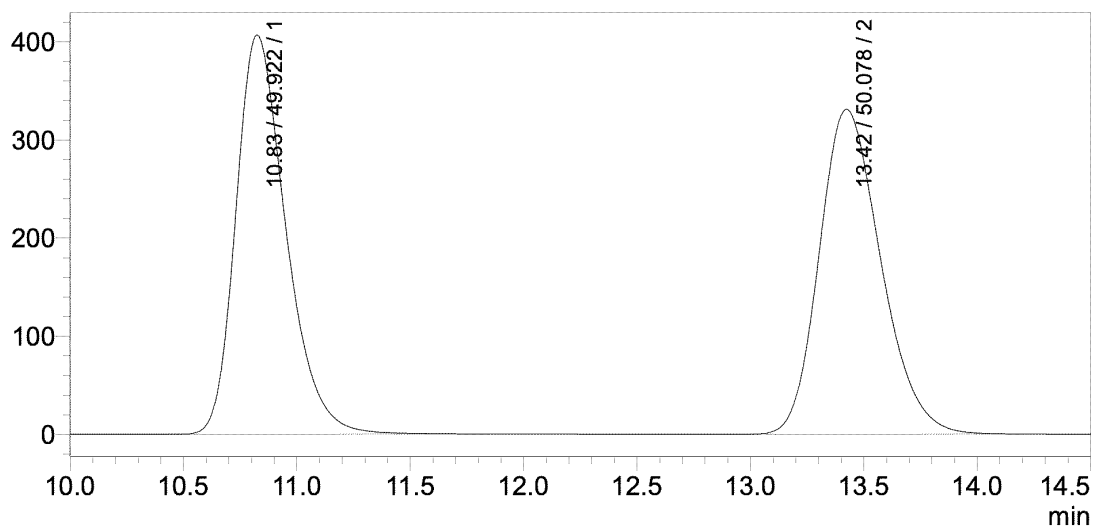

| Peak# | Ret. Time | Area%   |
|-------|-----------|---------|
| 1     | 10.83     | 49.922  |
| 2     | 13.42     | 50.078  |
| Total |           | 100.000 |

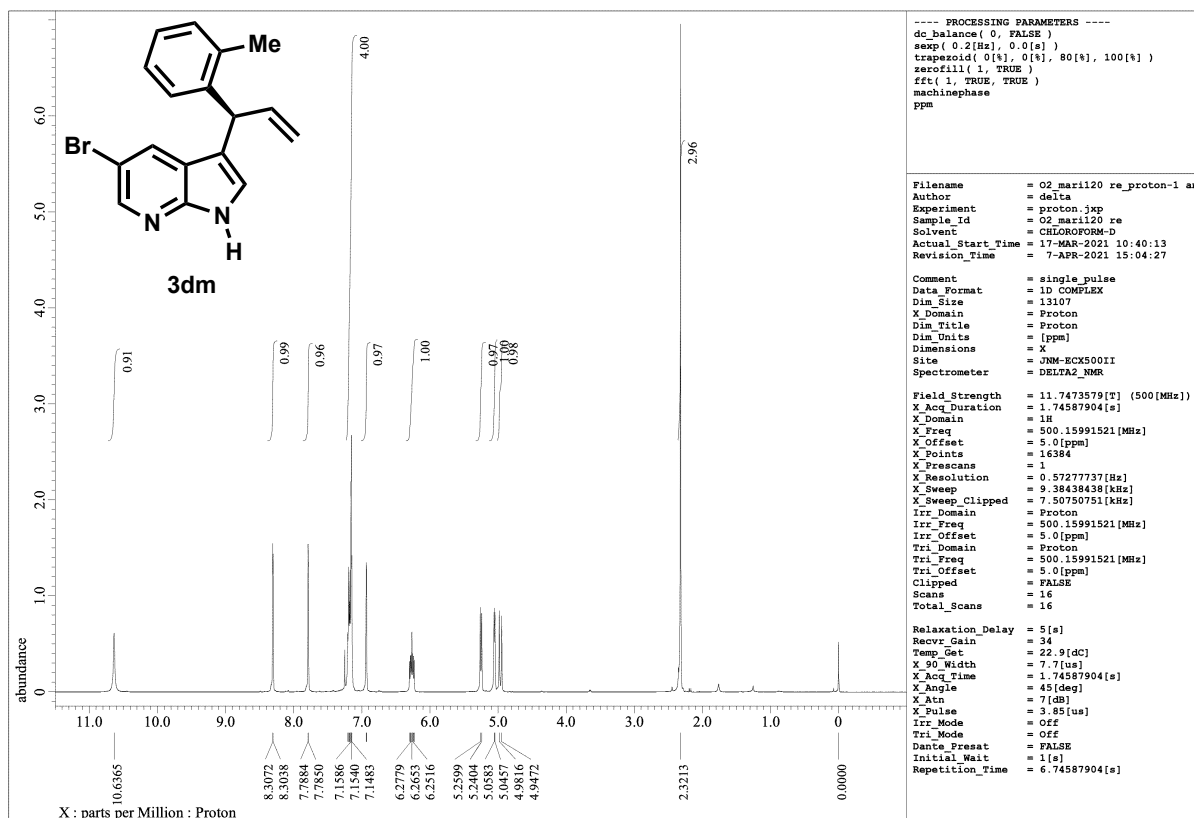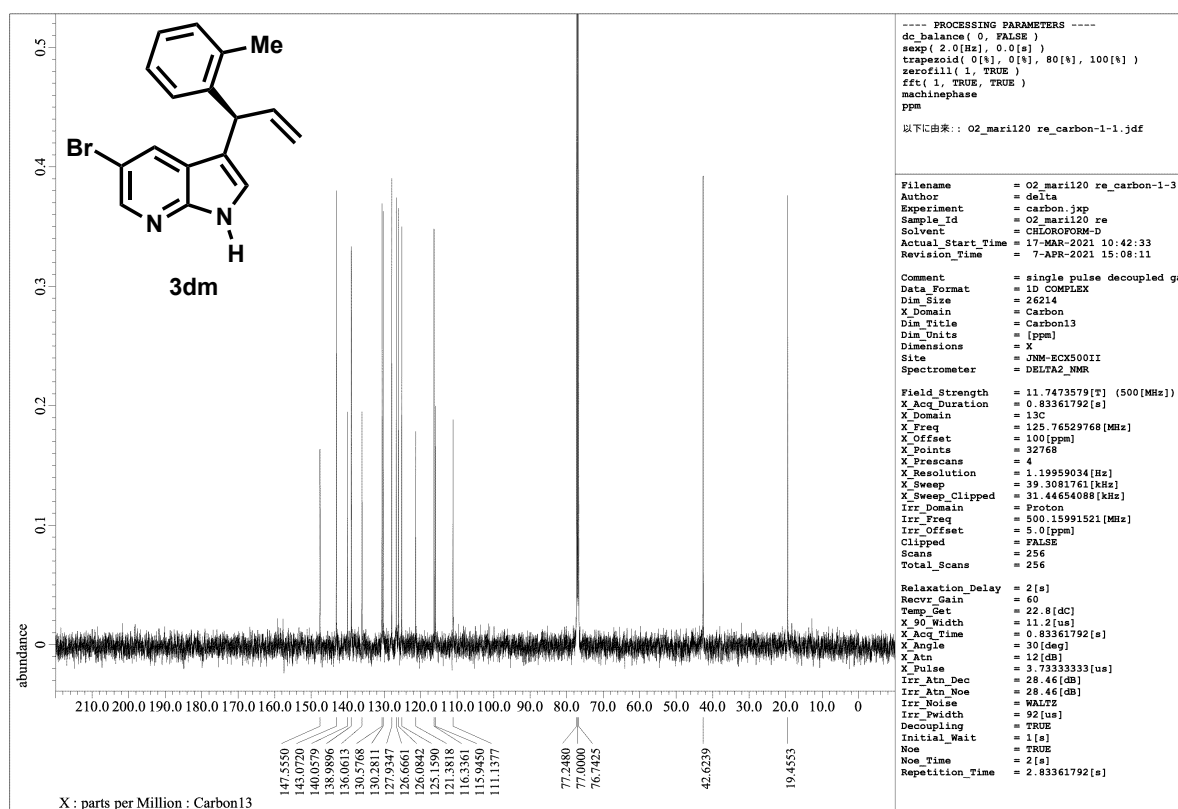

mV

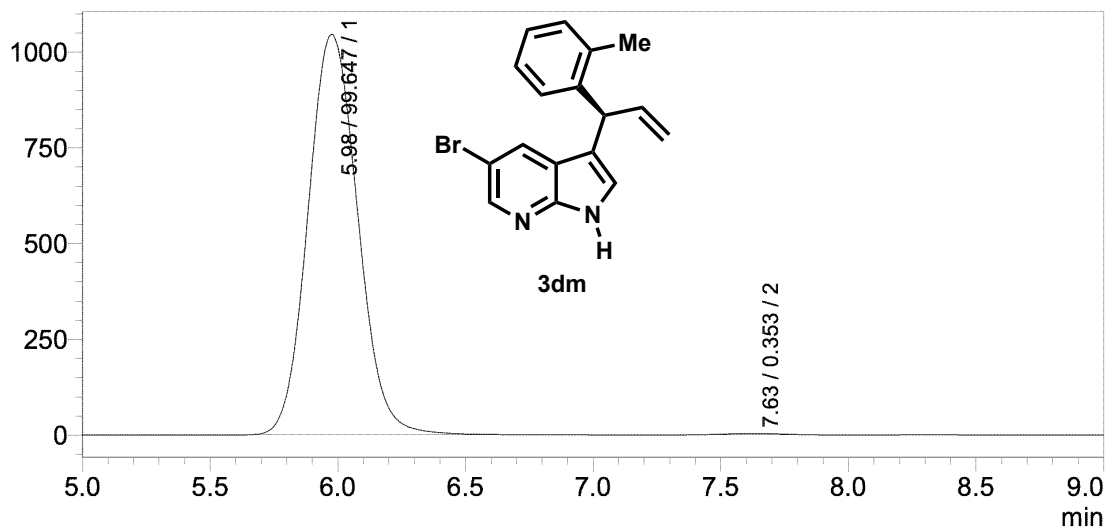

| Peak# | Ret. Time | Area%   |
|-------|-----------|---------|
| 1     | 5.98      | 99.647  |
| 2     | 7.63      | 0.353   |
| Total |           | 100.000 |

uV

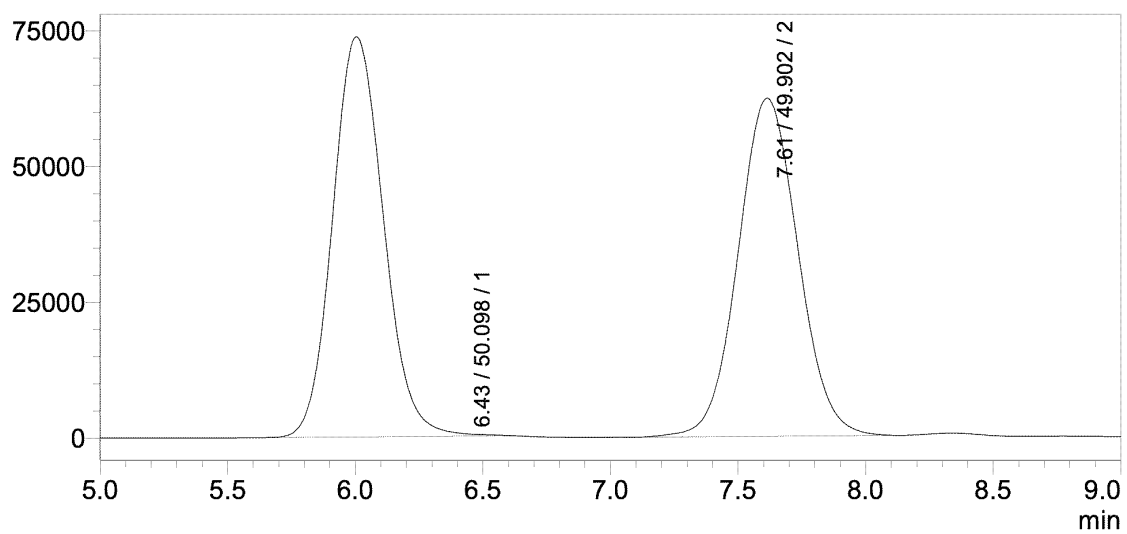

| Peak# | Ret. Time | Area%   |
|-------|-----------|---------|
| 1     | 6.43      | 50.098  |
| 2     | 7.61      | 49.902  |
| Total |           | 100.000 |

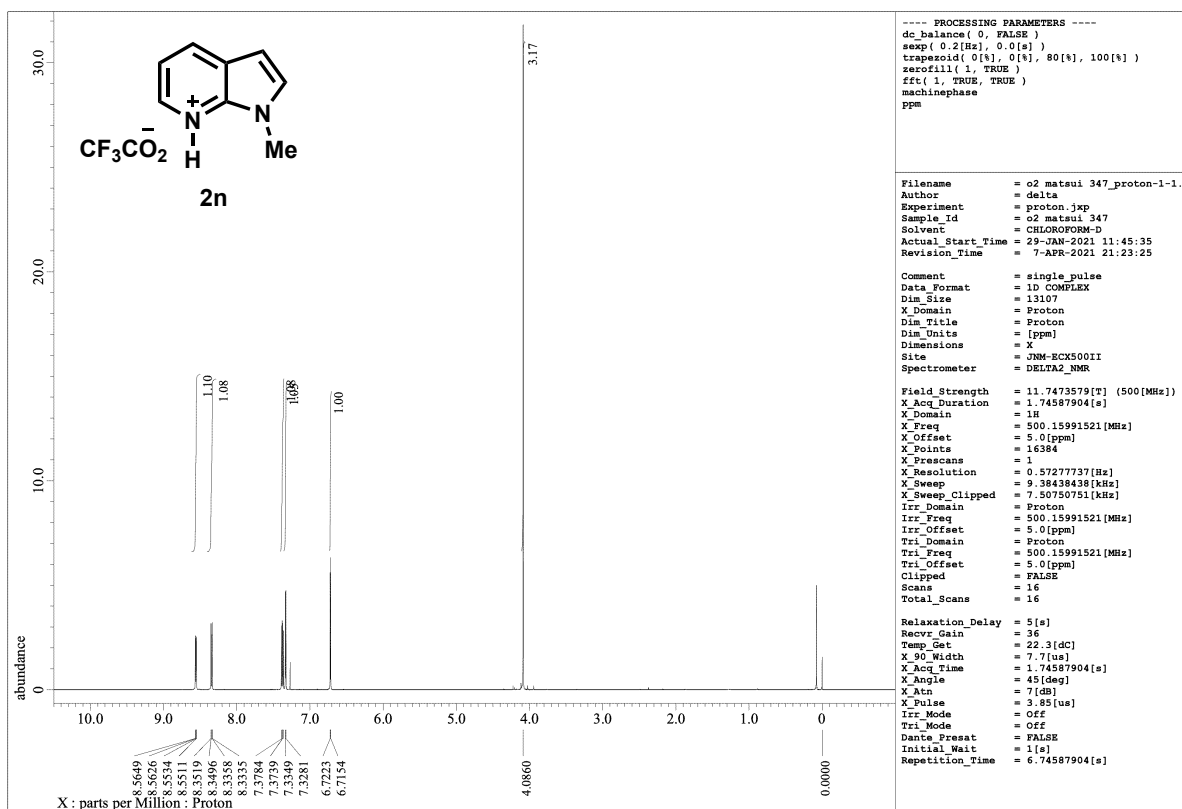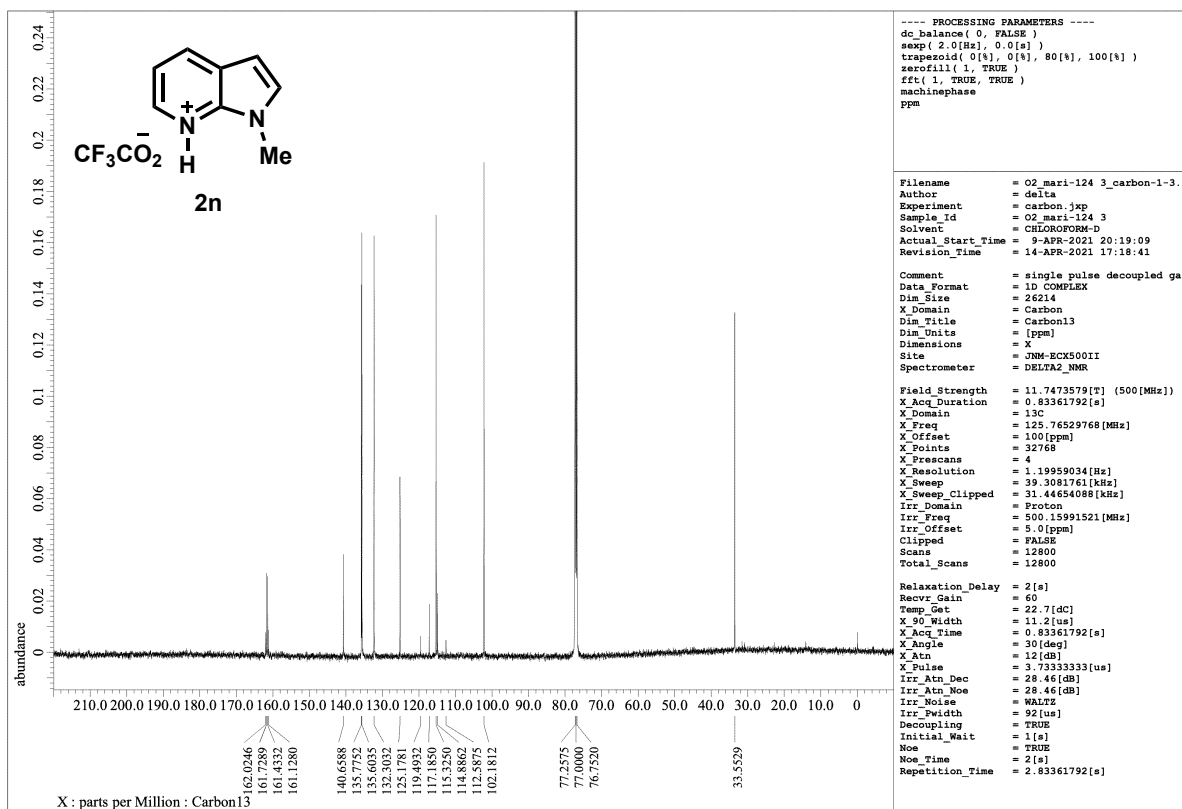

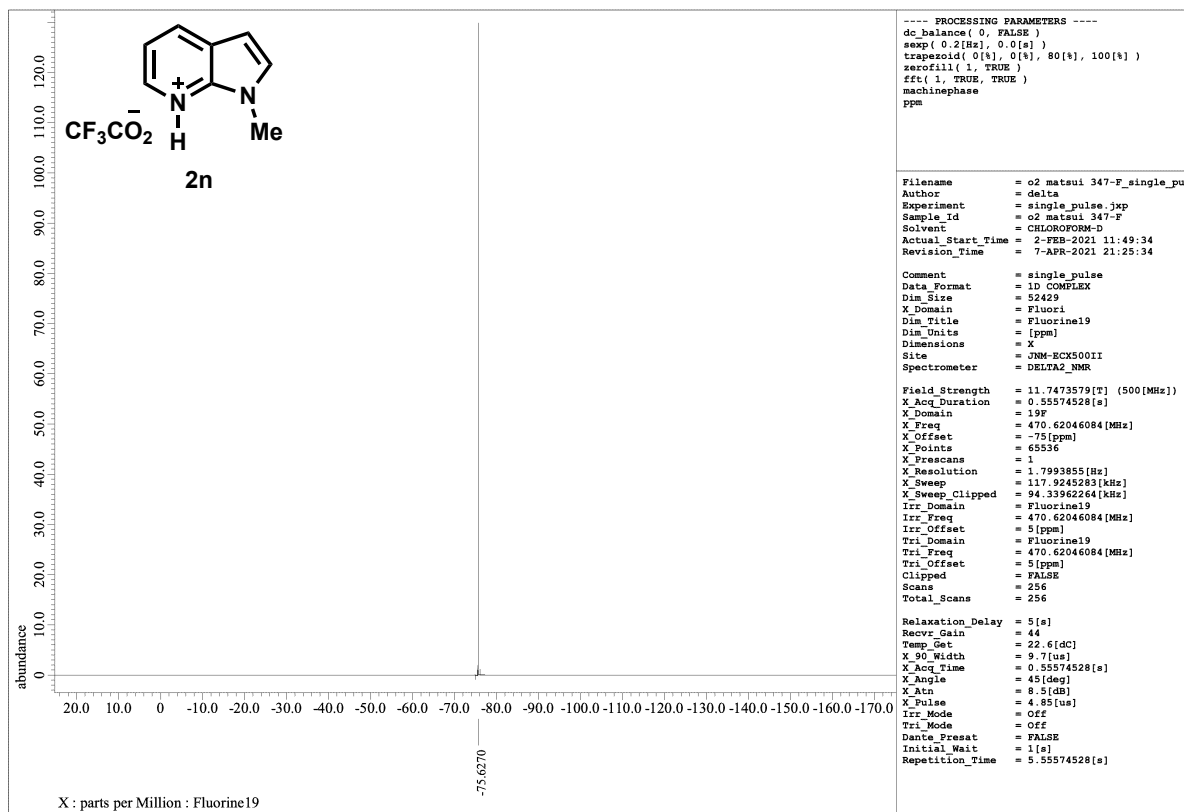

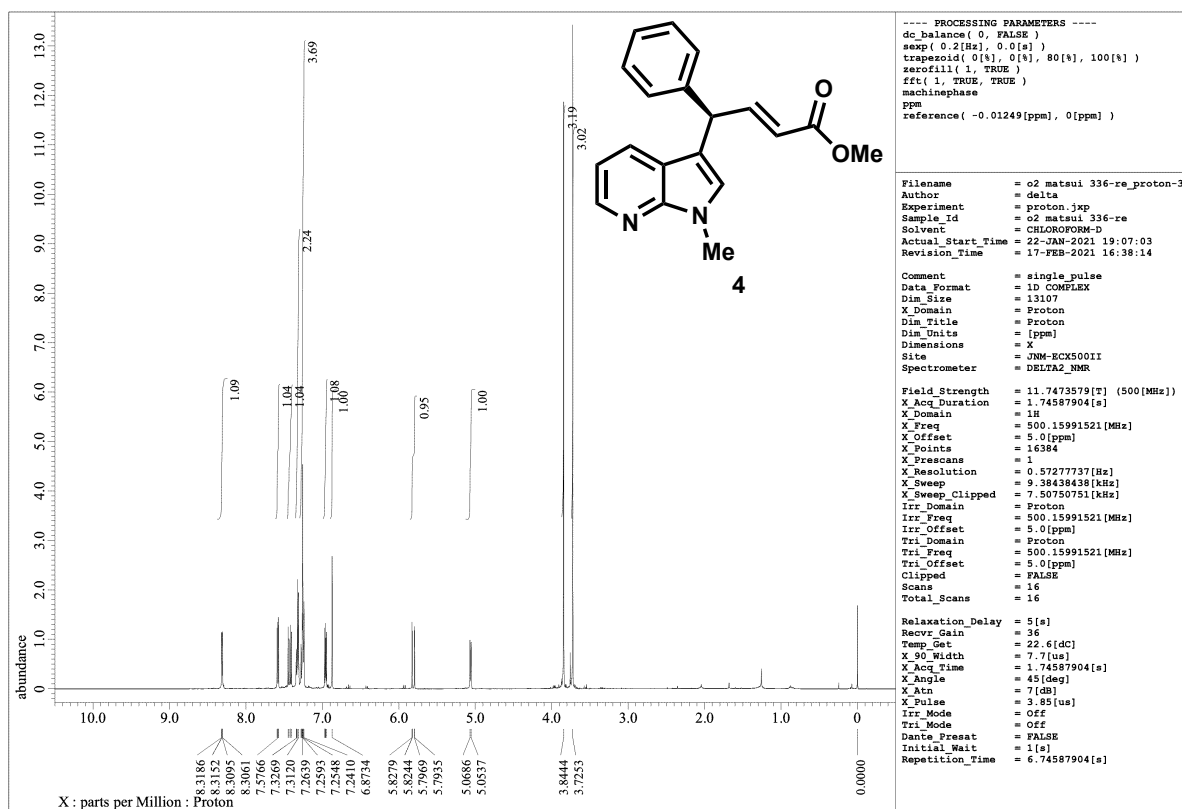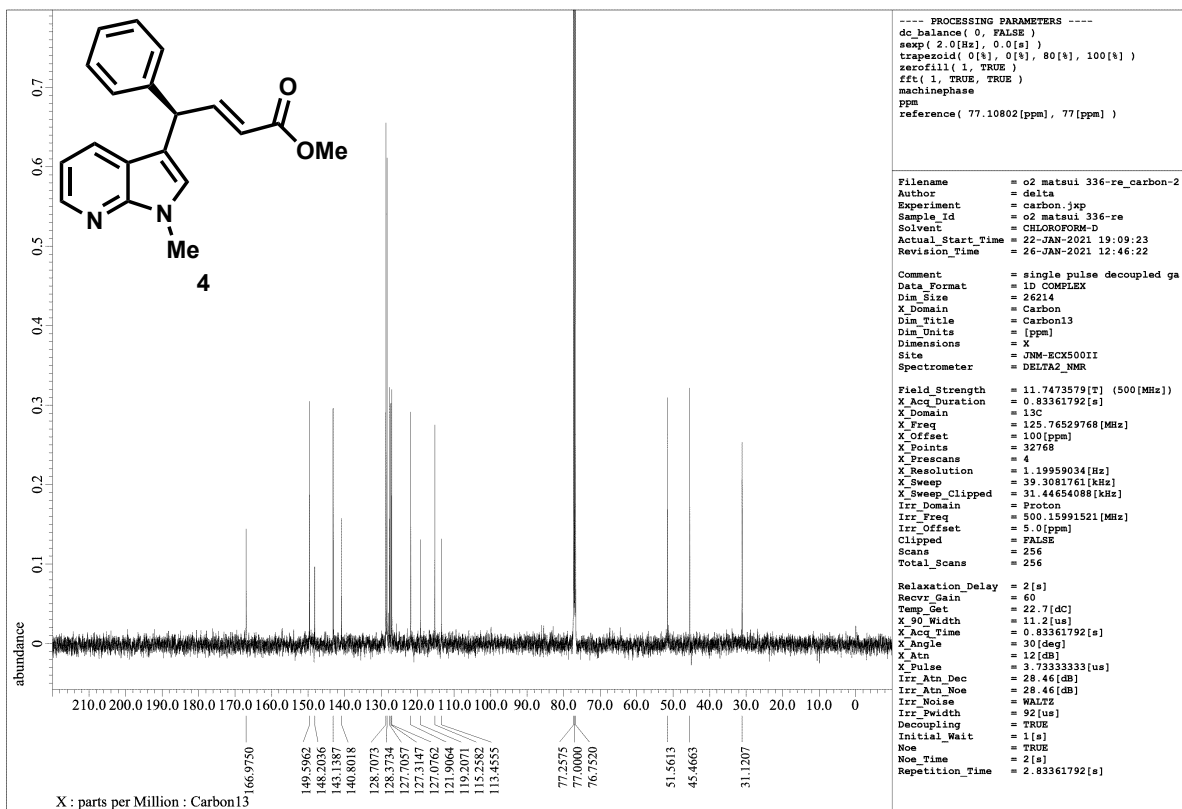

mV

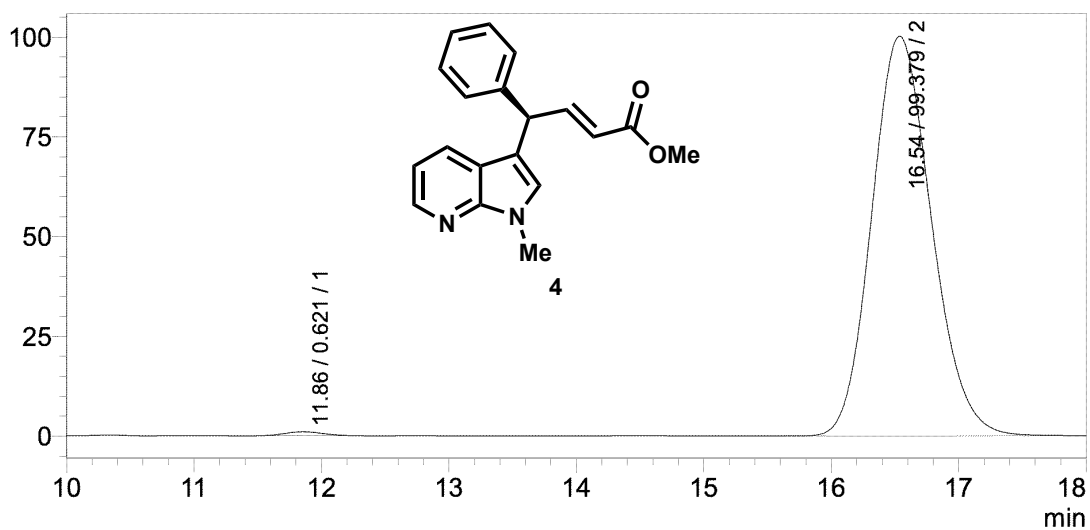

| Peak# | Ret. Time | Area%   |
|-------|-----------|---------|
| 1     | 11.86     | 0.621   |
| 2     | 16.54     | 99.379  |
| Total |           | 100.000 |

mV

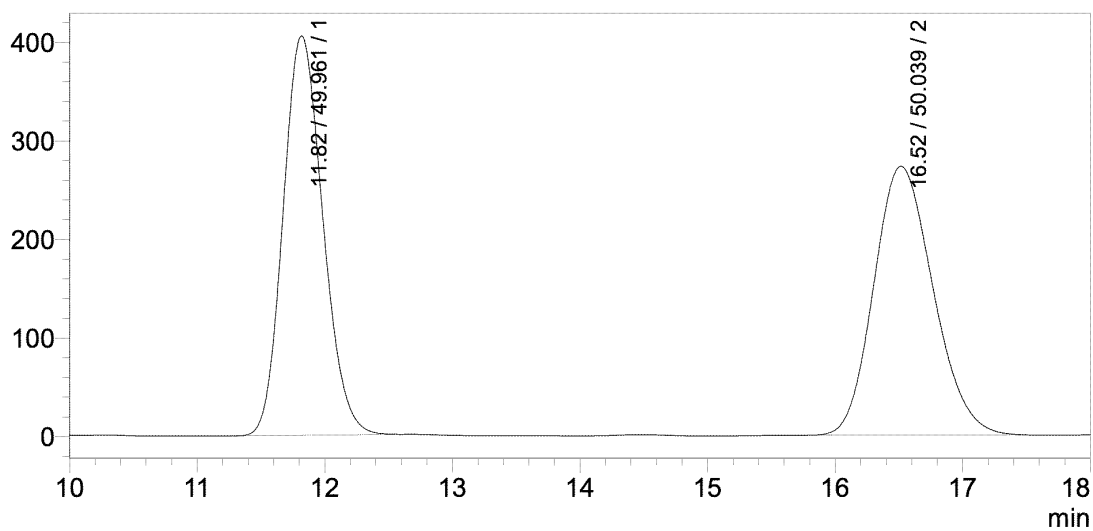

| Peak# | Ret. Time | Area%   |
|-------|-----------|---------|
| 1     | 11.82     | 49.961  |
| 2     | 16.52     | 50.039  |
| Total |           | 100.000 |

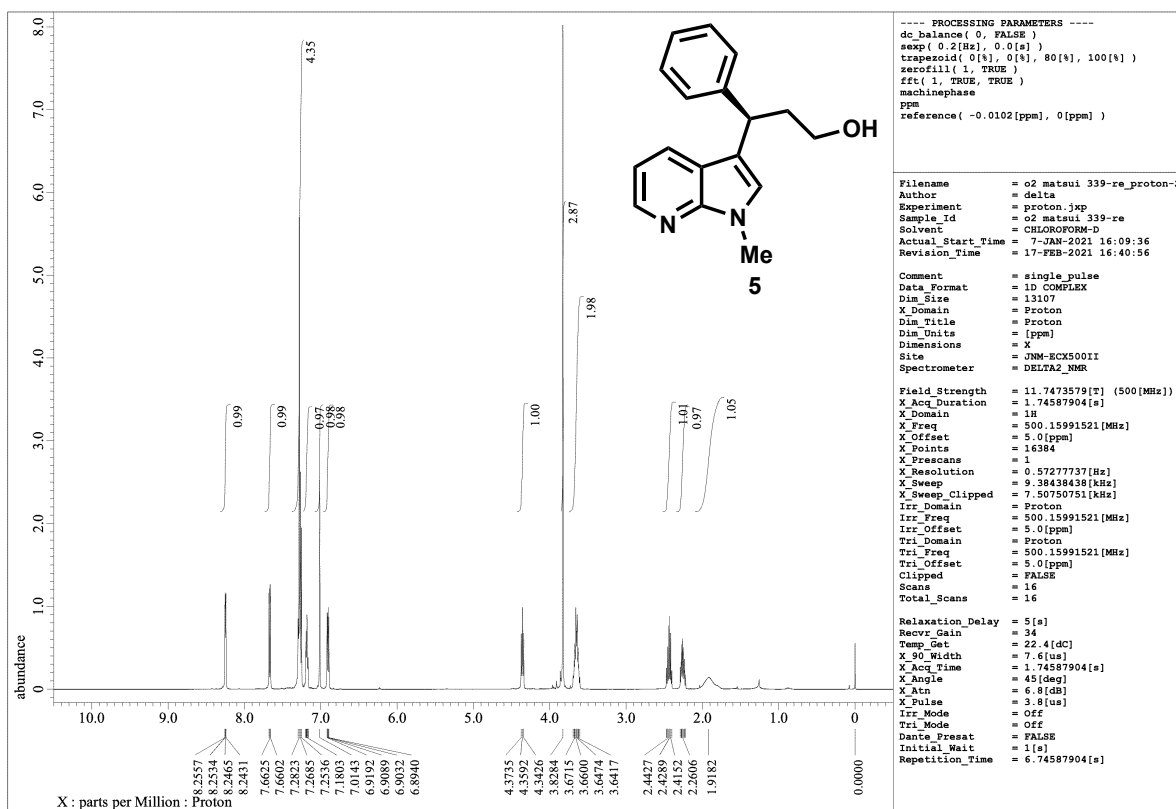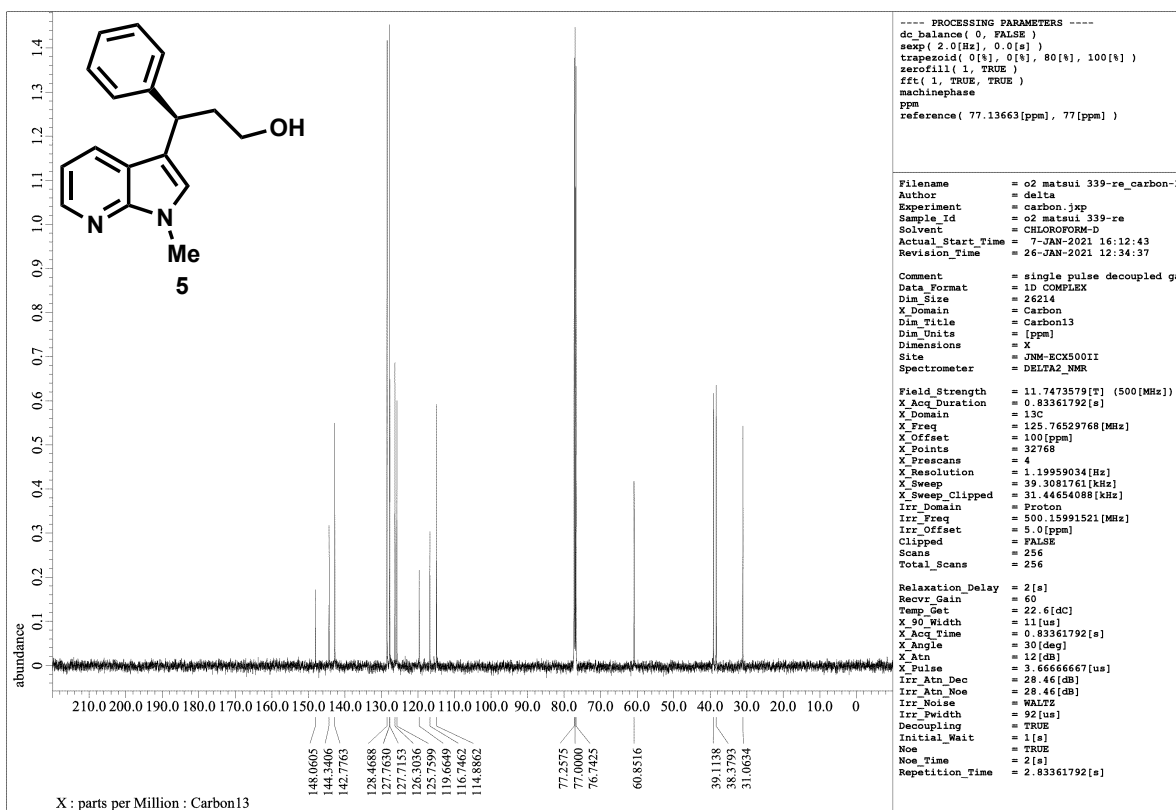

mV

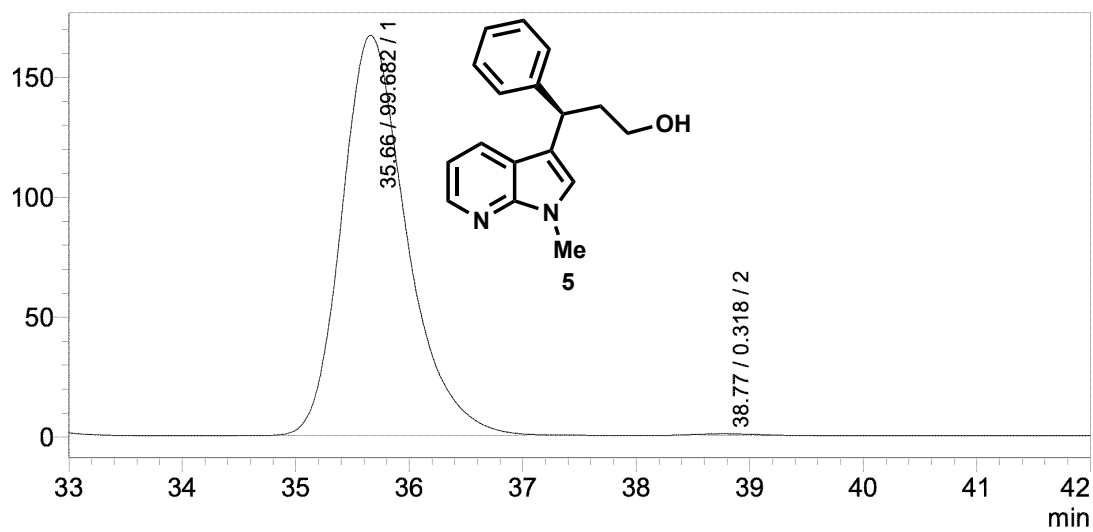

| Peak# | Ret. Time | Area%   |
|-------|-----------|---------|
| 1     | 35.66     | 99.682  |
| 2     | 38.77     | 0.318   |
| Total |           | 100.000 |

mV

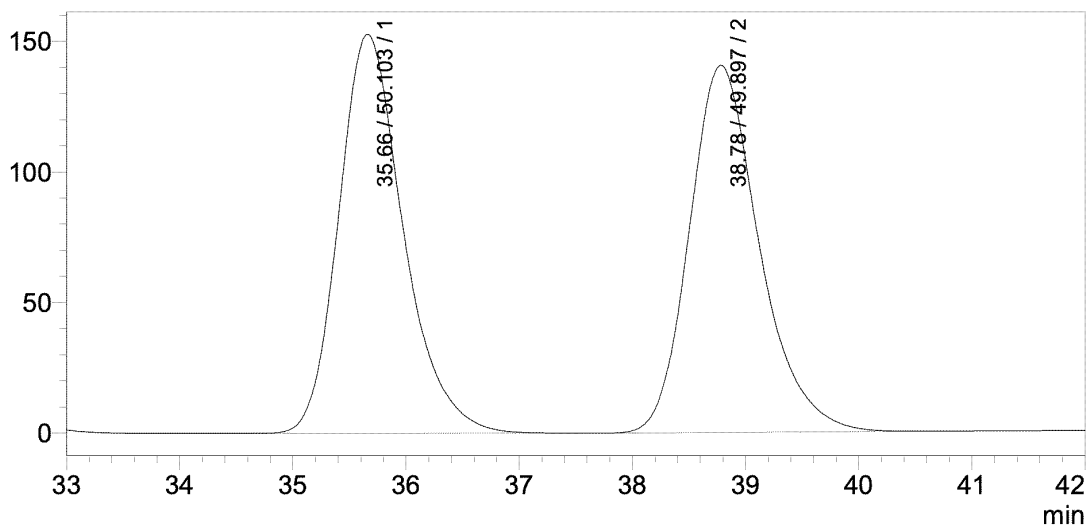

| Peak# | Ret. Time | Area%   |
|-------|-----------|---------|
| 1     | 35.66     | 50.103  |
| 2     | 38.78     | 49.897  |
| Total |           | 100.000 |

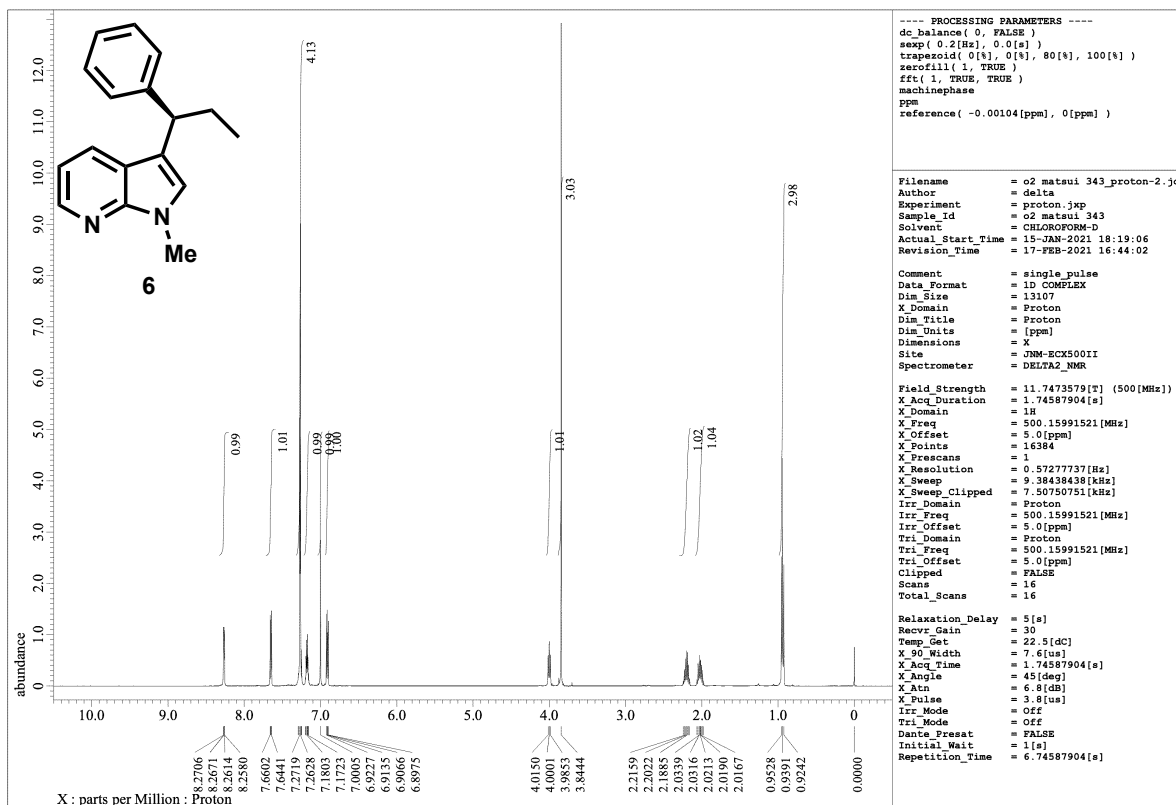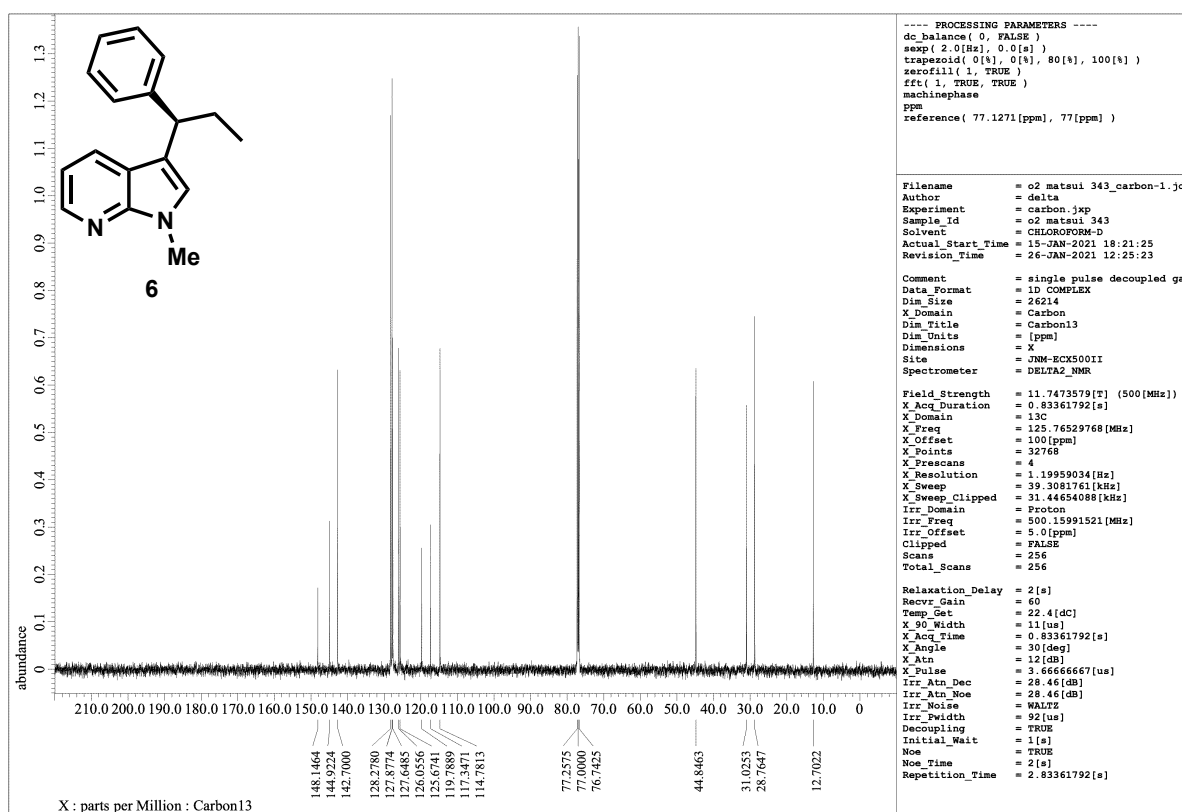

mV

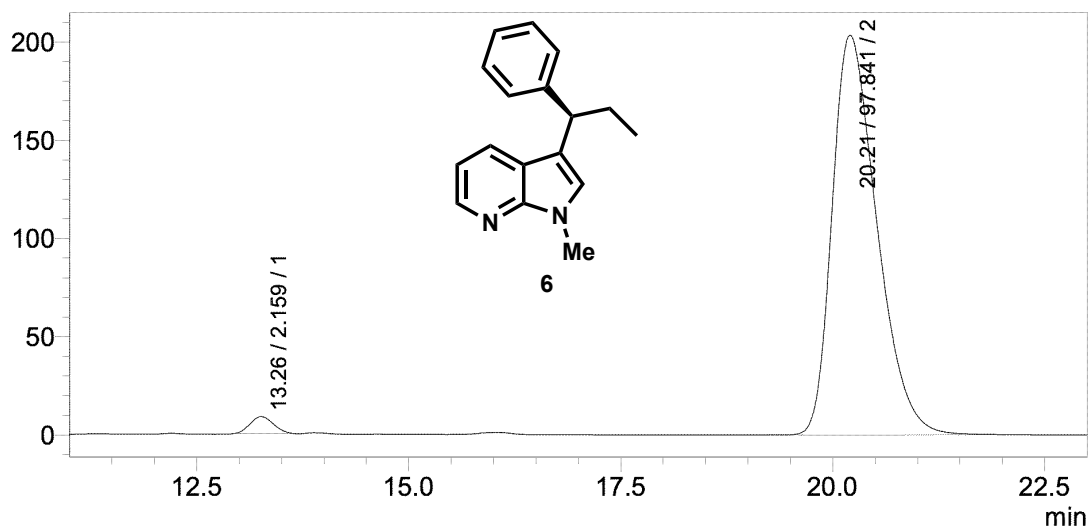

| Peak# | Ret. Time | Area%   |
|-------|-----------|---------|
| 1     | 13.26     | 2.159   |
| 2     | 20.21     | 97.841  |
| Total |           | 100.000 |

mV

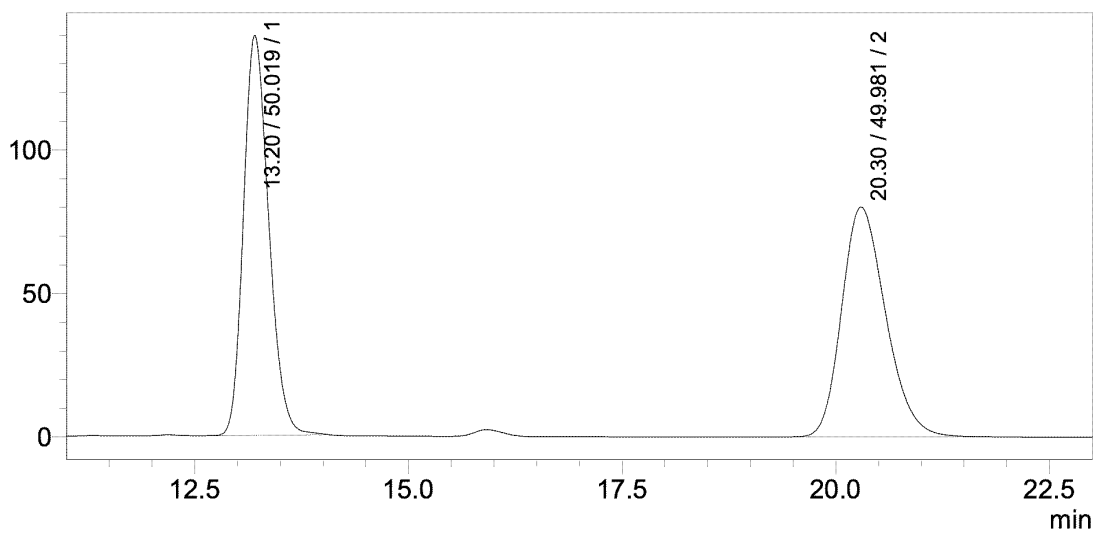

| Peak# | Ret. Time | Area%   |
|-------|-----------|---------|
| 1     | 13.20     | 50.019  |
| 2     | 20.30     | 49.981  |
| Total |           | 100.000 |
